# Supplementary material for: Identification of Nitrogen-Fixing Bradyrhizobium Associated With Roots of Field-Grown Sorghum by Metagenome and Proteome Analyses
Source: Front Microbiol. 2019 Mar 12;10:407. doi: 10.3389/fmicb.2019.00407 (PMC6422874; doi:10.3389/fmicb.2019.00407)
Supplement: Supplementary file 2 [file Table_1.XLSX]

## Sheet: Data Set 1
Data Set 1. Database of NifHDK peptides constructed by this work
ID	Nitrogenase subunit	Amino acid sequence (transrated from metagenome read)	Sequence of metagenome read	Taxonomy of best hit by NCBI Blast based on the metagenome read
H101	NifH	GVAGAGCGGITSINLLAENGTYEDLDVSFDVVGDVVCGGFAMPIRENKAQEIYIVMSGEMMAMFAANNISKGILKYAN	GAATTGGCGTACTTAAGAATGCCCTTGGAGATGTTATTGGCGGCGAACATCGCCATCATCTCGCCCGACATCACGATGTAAATTTCCTGCGCCTTGTTCTCGCGGATCGGCATCGCAAAGCCGCCGCAGACGACGTCGCCGACCACGTCGAAGGAGACCTAGTCGAGGTCCTCATAGGTGCCATTCTCCGCGAGTAAGTTGATCGAGGTGATGCCGCCACAGCCGGCTCCGGCTACGCCGGTCGTCAGAC	Bradyrhizobium sp. TUTVSCRM-I
H103	NifH	LAHKIHNNGGKGIIPTPITMDELEDMLMEHGIMKAVDESVVGKTAAELAAMSA	AGCTCGCGCACAAGATCCACAATAACGGCGGCAAGGGCATCATCCCGACCCCGATCACGATGGACGAGCTCGAGGACATGCTGATGGAGCACGGCATCATGAAGGCGGTCGACGAATCCGTCGTCGGCAAGACCGCAGCCGAACTCGCCGCCATGTCGGCCTGAGACGGCCGACGCCACGTCCGGCGCTTCGGAGGAAGCGCCGGCCCTTCATTACAGAGGAAAGAT	Bradyrhizobium sp. S23321
H104	NifH	ELAHTIPNNGGKGIIPTPITMDELEDMLMEHGIMKAVDESVVGKTAAELAAMSA	ATCTTTCCTCTGTAATGAAGGGCCGGCGCTTCCTCCGAAGCGCCGGACGTGGCGTCGGCCGTCTCAGGCCGACATGGCGGCGAGTTCGGCTGCGGTCTTGCCGACGACGGATTCGTCGACCGCCTTCATGATGCCGTGCTCCATCAGCATGTCCTCGAGCTCGTCCATCGTGATCGGGGTCGGGATGATGCCCTTGCCGCCGTTATTGGGGATCGTGTGGGCGAGCTCTGTCTTTTATTCACATCTTACG	Bradyrhizobium sp. S23321
H106	NifH	DNIVQKAEFNKKTVTEFDPEANQAQEYRELGRKIIENTDLVIPHPLTMDQLEKMVVKYGLSD	CGACAACATCGTGCAGAAAGCGGAATTCAACAAGAAAACCGTCACCGAATTTGACCCGGAAGCTAACCAGGCGCAGGAGTATCGCGAACTGGGACGCAAGATCATTGAAAATACCGACCTGGTGATCCCCCATCCGCTGACCATGGATCAGCTGGAAAAAATGGTCGTTAAATATGGTCTGAGCGATTAATTCGTCCGGTTATTTTACAGTCATTCCCGGAGGGGGATTAATTATGCCGTATCTTGAGTTT	Kosakonia oryzae Ola 51
H107	NifH	MPIRETKAQEIYSVMSGEMMGLYDANSISKGILKYANAGGVRLGGLGCNERQTDKELELAEAMAKKLGTQLIYFVPRDNIVQH	GTGCTGCACGATGTTGTCGCGCGGCACGAAGTAGATCAGCTGGGTGCCGAGCTTCTTGGCCATGGCTTCCGCAAGCTCCAGCTCCTTGTCGGTCTGGCGCTCGTTGCAGCCCAGCCCGCCGAGGCGCACGCCGCCGGCATTGGCGTACTTCAGAATACCCTTGGAGATGCTGTTGGCGTCATACAGCCCCATCATCTCACCCGACATCACGCTGTAGATTTCCTGCGCCTTGGTCTCGCGGATCGGCATC	Bradyrhizobium sp. M12
H108	NifH	DVLGDVVCGGFAMPIRENKAQEIYIVMSGEMMAMYAANNISKGILKYANSGGVRLGGLVCNERQTDKELELADALAKKLGTKL	CGACGTGCTCGGCGACGTGGTCTGCGGCGGCTTCGCGATGCCGATCCGCGAGAACAAGGCGCAGGAGATCTACATCGTGATGTCCGGCGAGATGATGGCGATGTATGCCGCCAACAACATCTCGAAGGGCATTCTGAAATATGCGAACTCCGGCGGCGTGCGCCTGGGCGGCCTGGTCTGCAACGAGCGCCAGACCGACAAGGAGCTGGAGCTGGCGGATGCGCTGGCCAAGAAGCTCGGCACCAAGCTGA	Bradyrhizobium oligotrophicum S58
H109	NifH	LADAMAKKLGTKLIYFVPRDNIVQSAELRRMTVLEYAPDSVQAGHYRSLAEKIHNNAGKGIIPTPITMDELEDMLMEHGIMK	GCCTTCATGATGCCGTGCTCCATGAGCATGTCTTCGAGTTCGTCCATCGTGATCGGGGTCGGGATGATGCCCTTGCCGGCGTTGTTGTGGATCTTCTCCGCCAGCGAGCGGTAGTGGCCGGCCTGGACCGAATCCGGTGCATATTCCAGCACGGTCATGCGGCGCAGCTCGGCGCTCTGCACGATGTTATCGCGCGGCACGAAGTAGATCAGCTTGGTGCCGAGCTTCTTGGCCATCGCATCCGCCAGCT	Bradyrhizobium oligotrophicum S58
H110	NifH	ILHAKAQDTILSLAAAAGSVEDLEIEEVMKVGYRDIKCVESGGPEPGVGCAGRGVITSINFLEENGAYEDIDYV	ATCCTGCACGCCAAGGCGCAGGACACGATCCTGAGCCTGGCCGCTGCCGCCGGCAGCGTCGAGGACCTCGAGATCGAAGAGGTCATGAAGGTCGGCTATCGCGACATCAAGTGCGTCGAGTCGGGTGGACCGGAGCCTGGCGTCGGCTGCGCCGGCCGCGGCGTCATCACCTCGATCAACTTCCTGGAAGAGAACGGCGCCTATGAGGACATCGACTACGTG	Paenibacillus wenxiniae
H111	NifH	ILHGKAQDTILSLAAAAGSVEELEIEEVMKVGYRDIKCVESGGPEPGVGCAGRGVITSINFLEENGAYEDIDYV	CACGTAGTCGATGTCCTCATAGGCGCCGTTCTCTTCCAGGAAGTTGATCGAGGTGATGACGCCGCGGCCGGCGCAGCCGACGCCAGGCTCCGGTCCACCCGACTCGACGCACTTGATGTCGCGATAGCCGACCTTCATGACCTCTTCGATCTCGAGTTCCTCGACGCTGCCGGCGGCAGCGGCCAGGCTCAGGATCGTGTCCTGCGCCTTGCCGTGCAGGAT	Paenibacillus wenxiniae
H112	NifH	HYRTLASRIHNNKGKGIIPTPITMDELEDMLMEHGIMKAVDESVVGKTAAELAAMPA	TGCGAATATCCTTCGGTTTATCCTGTGCAATGAGGGGCCGGCGCTTCCTCCGAAGCGCCGGATGTAACTGGACGGCCTCAGGCCGGCATCGCCGCGAGTTCAGCCGCGGTCTTGCCGACGACGGACTCGTCCACCGCCTTCATGATGCCGTGCTCCATCAGCATGTCCTCGAGCTCGTCCATCGTGATCGGGGTCGGGATGATGCCCTTGCCCTTGTTGTTGTGAATCCTGGACGCAAGCGTGCGATAGTG	Bradyrhizobium sp. S23321
H113	NifH	AEALAKKLGTQLIYFVPRDNIVQHAELRRMTVLEYAPDSKQAEHYRTLASRIHKNKSKGIIPTPITMAELKDIRMEHGIKTA	GGCGGAAGCTCTGGCGAAGAAGCTCGGTACCCAGCTGATCTACTTCGTGCCTCGCGACAACATCGTGCAGCACGCGGAGCTGCGCCGCATGACGGTTCTGGAATATGCGCCCGACTCGAAGCAGGCGGAGCACTATCGCACGCTTGCGTCCAGGATTCACAAAAACAAGAGCAAGGGCATCATCCCGACCCCGATCACGATGGCCGAGCTCAAGGACATTCGTATGGAGCACGGCATCAAGACGGCGGAGG	Bradyrhizobium sp. S23321
H115	NifH	MYAANNISKGILKYANSGGVRLGGLVCNERQTDKELELADALAKKLGTKLIYFVPRDNIVQHAELRRMTVLEYAPDSVQAGH	CGATGTATGCCGCCAACAACATCTCGAAGGGCATTCTGAAATATGCGAACTCCGGCGGCGTGCGCCTGGGCGGCCTGGTCTGCAACGAGCGCCAGACCGACAAGGAGCTGGAGCTGGCGGATGCGCTCGCCAAGAAGCTCGGCACCAAGCTGATCTACTTCGTGCCGCGCGACAACATCGTGCAGCACGCCGAGCTGCGCCGCATGACCGTGCTGGAATACGCGCCGGATTCGGTCCAGGCCGGCCACTA	Bradyrhizobium oligotrophicum S58
H116	NifH	RPLTGLKSAPDPFQAGHYRQLAEKIHNNAGKGIIPTPITMDELEDMLMEHGIMKAVDESQIGKTAADLAATA	GCTTAAGCCGTTGCGGCGAGATCGGCGGCAGTCTTTCCGATTTGGCTCTCGTCGACGGCCTTCATGATGCCATGCTCCATCAGCATGTCTTCGAGCTCGTCCATCGTGATCGGGGTCGGGATGATGCCCTTGCCGGCGTTGTTGTGGATCTTCTCCGCCAGCTGGCGGTAGTGGCCGGCCTGGAACGGATCCGGGGCGGATTTCAGGCCGGTCAGGGGGCGCCGCCCGGTCGGGTGGCGCGGTTTGTACGG	Bradyrhizobium oligotrophicum S58
H119	NifH	QIAFYGKGGTGKSTTSQTTLAAPAEMGHKILSVGCDPKADSTRLILHAKAQDTILSLAAAAGSVEDLEIEEVMKVGYRDIR	CAGCGGATGTCGCGGTAGCCGACCTTCATGACCTCTTCGATCTCGAGGTCCTCGACGCTGCCGGCGGCCGCGGCGAGGCTGAGGATGGTGTCCTGCGCCTTGGCGTGCAGGATCAGTCGGGTCGAGTCGGCCTTGGGATCGCAGCCGACGCTCAGGATCTTGTGGCCCATCTCGGCGGGCGCCGCGAGGGTGGTTTGCGAGGTCGTCGACTTGCCGGTGCCGCCTTTGCCGTAAAATGCGATTTGTTGGAG	Bradyrhizobium sp. BTAi 1
H120	NifH	ELRRMTVLEYAPDSKQAEHYRTLATRIHNNKGKGIIPTPITMDELEDMLMEHGIMKAVDESVVGKTAAELAAMPA	GAGCTGCGCCGCATGACGGTTCTGGAATATGCGCCCGACTCGAAGCAGGCGGAACACTATCGCACGCTCGCGACCCGGATTCACAACAACAAGGGCAAGGGCATCATCCCGACCCCGATCACGATGGACGAGCTCGAGGATATGCTGATGGAGCACGGCATCATGAAGGCGGTGGACGAGTCCGTCGTCGGAAAGACCGCGGCTGAACTCGCGGCGATGCCGGCCTGGTGCCGTCCAGGTACGTCCGGCG	Bradyrhizobium sp. S23321
H121	NifH	LELAEAMAKKLGTQLIYFVPRDNIVQHAELRRMTVLEYAPDSVQAGHYRSLAEKIHNNGGKGIIPTPITMDELEDMLMEHGIM	TCATGATGCCGTGCTCCATCAGCATGTCCTCGAGCTCGTCCATGGTAATGGGCGTCGGGATGATGCCCTTGCCGCCATTGTTGTGGATCTTCTCGGCGAGACTCCGGTAGTGGCCGGCCTGCACCGAGTCCGGCGCATATTCCAGCACCGTCATGCGGCGCAGCTCGGCGTGCTGCACGATGTTGTCGCGCGGCACGAAGTAGATCAGCTGGGTGCCGAGCTTCTTGGCCATCGCTTCCGCAAGCTCGAG	Bradyrhizobium oligotrophicum S58
H122	NifH	IDYVSYDVLGDVVCGGFAMPIRENKAQEIYIVMSGEMMAMYAANNISKGILKYANSGGVRLGGLVCNERQTDKELELAEAMAK	CATCGACTACGTGTCCTACGACGTGCTGGGCGACGTGGTGTGCGGCGGCTTTGCGATGCCGATCCGCGAGAACAAGGCGCAGGAAATCTACATCGTGATGTCCGGCGAGATGATGGCGATGTATGCCGCCAACAACATCTCGAAGGGCATTCTGAAGTATGCCAATTCCGGCGGCGTGCGTCTGGGCGGTCTGGTCTGCAACGAGCGCCAGACCGACAAAGAGCTCGAGCTTGCGGAAGCGATGGCCAAGA	Bradyrhizobium sp. FVNS22
H123	NifH	YEDIDYVSYDVLGDVVCGGFAMPIRENKAQEIYIVMSGEMMAMYAANNISKGILKYANSGGVRLGGLVCNERQTDKELELAE	CCTATGAAGACATCGACTACGTCTCCTACGACGTGCTCGGCGACGTCGTCTGCGGCGGCTTCGCGATGCCGATCCGCGAGAACAAGGCGCAGGAAATCTACATCGTGATGTCAGGCGAGATGATGGCGATGTACGCCGCCAACAACATCTCGAAGGGCATTCTGAAGTACGCCAATTCCGGCGGCGTGCGCCTGGGCGGGCTGGTCTGCAACGAGCGCCAGACCGACAAGGAGCTGGAGCTTGCGGAAGC	Bradyrhizobium sp. FVNS22
H124	NifH	MMAMSAANNISKGILKYANSGGVRLGGLVCNERQTDKELELAEAMAKKLGTQLIYFVPRDNIVQHAELRRMTVLEYAPDSVQ	GCCTGAACCGAGTCCGGGGCATATTCCAGCACGGTCATGCGGCGGAGCTCGGCGTGCTGCACGATGTTGTCACGCGGCACGAAGTAGATCAGCTGGGTGCCGAGCTTCTTGGCCATGGCTTCCGCAAGCTCCAGCTCCTTGTCGGTCTGGCGCTCGTTGCAGACCAGCCCGCCCAGGCGCACGCCGCCGGAATTGGCGTACTTCAGAATGCCCTTCGAGATGTTGTTGGCGGCGGACATCGCCATCATCT	Bradyrhizobium oligotrophicum S58
H126	NifH	ERTDLLLHAKSQPFEWLACTAGSVEDLEIEEIMKVGYQNIRCVDSGGPEPGVDRAARGVITS	GCTGGAGGTGATGACCCCGCGGGCGGCGCGGTCGACGCCAGGCTCCGGACCGCCGGAGTCGACGCAGCGGATGTTCTGGTAGCCGACCTTCATGATCTCCTCGATTTCGAGGTCTTCGACGCTGCCGGCCGTGCACGCCAGCCATTCGAAGGGTTACTGCGACTTGGCGTGCAGGAGCAAGTCGGTGCGCTCATGCATCGTATTGCTAGCCCGTGCCATCATCTATCGCGTCTCCTGCGCTCACGCGCATG	Bradyrhizobium sp. STM 3843
H127	NifH	DELEDMLMEHGIMKAVDESVVGKT	GGATGAGCTCGAGGACATGCTGATGGAGCACGGCATCATGAAGGCGGTCGACGAGTCCGTCGTCGGCAAGACCGCAGCCGAACTCGCCGCCATGTCGGCCTGATCCCTCGTGCCGGCCTCCCCGACCGGGGAGGCCGGCATCGGCTTCACAACGACAGCAGCGGAGCCTTCCGTG	Bradyrhizobium sp. S23321
H128	NifH	DELEDMLMEHGIMKAVDESVVGK	CACGGAAGGCTCCGCTGCTGTCGTTGTGAAGCCGATGCCGGCCTCCCCGGTCGGGGAGGCCGGCACGAGGGATCAGGCCGACATGGCGGCGAGTTCGGCTGCGGGCTTGCCGACGACGGACTCGTCGACCGCCTTCATGATGCCGTGCTCCATCAGCATGTCCTCGAGCTCATCCCTGTTTCTTATCCACATCTGACGCTGCCGACGATTTACCCTGTGTCGATCCCGGTGGTCGGCTGTTCCTTAAAAAA	Bradyrhizobium sp. S23321
H129	NifH	MESNMSSLRQIAFYGKGGIGKSTTSQNTLAALAEMGHKILIVGCDPKADSTRLILHAKAQDTILSLAANAGSVEDLE	GTCATTGGCAATCGGTTGATGGAGAGCAACATGTCTTCACTGAGACAAATCGCGTTTTACGGTAAGGGCGGTATCGGCAAATCGACGACGTCGCAGAACACGCTCGCGGCGCTTGCCGAGATGGGTCACAAGATCCTGATCGTCGGCTGCGACCCCAAGGCGGATTCGACCCGCCTGATCCTGCACGCAAAGGCGCAGGACACCATTCTCAGTCTTGCGGCTAACGCCGGCAGCGTCGAAGACCTCGAAAT	Bradyrhizobium sp. S23321
H130	NifH	KGGNGKSTTSQNTLAALAEMGHKILIVGCDPKADSTRLILHAKAQDTILSLAANAGSVEDLEIEDVMKVGYQNIRCVESGGPE	GCTCTGGACCGCCGGACTCGACGCAGCGGATGTTCTGGTAGCCGACCTTCATCACGTCCTCGATTTCGAGGTCTTCGACGCTGCCGGCGTTAGCCGCAAGACTGAGAATGGTGTCCTGCGCCTTTGCGTGCAGGATCAGGCGGGTCGAATCCGCCTTGGGGTCGCAGCCGACGATCAGGATCTTGTGACCCATCTCGGCCAGCGCCGCGAGCGTGTTCTGCGACGTCGTCGATTTGCCGTTACCGCCCTTT	Bradyrhizobium sp. TUTAHSA118
H131	NifH	ALRQIAFYGKGGIGKSTTSQNTLAALAQMGHRILIVGCDPKADSTRLILHAKAQDTILSLAAAAGSVEDLEIEEVMKVGYQNI	GCACTACGACAAATCGCGTTTTACGGCAAAGGCGGCATCGGTAAGTCGACGACCTCGCAGAATACCCTGGCGGCGCTGGCGCAGATGGGGCACCGGATTCTGATCGTCGGTTGCGATCCCAAGGCTGACTCGACCCGCCTGATCCTGCACGCCAAGGCGCAGGACACCATCTTGAGCCTGGCGGCAGCGGCCGGCAGCGTCGAAGACCTCGAAATCGAAGAGGTCATGAAGGTCGGCTACCAGAACATCCG	Bradyrhizobium sp. STM 3843
H132	NifH	LVVGAAPRAAPPRLILHARAQDTILSLAAAAGSVEDLEIEEVMKVGYQNIRCVESGGPEPGVGCAGRGVITSINFLEENGAYE	CCTCATAGGCGCCGTTCTCCTCGAGGAAGTTGATCGAGGTGATGACCCCGCGGCCGGCGCAGCCGACGCCAGGCTCCGGACCGCCGGATTCGACGCAGCGGATGTTCTGGTAGCCGACCTTCATGACCTCTTCGATTTCGAGGTCTTCGACGCTGCCGGCCGCTGCCGCCAGGCTCAAGATGGTGTCCTGCGCCCTGGCGTGCAGGATCAGGCGGGGCGGGGCAGCCCTGGGAGCCGCACCCACGACCAGA	Bradyrhizobium sp. STM 3843
H133	NifH	VDYVSYDVLGDVVCGGFAMPIRENKAQEIYIFMSGEKMALYAANKIAKGIFKYANSGGVRLGGLSFQERQTDREVD	GTCGACTACGTCTCCTACGACGTTCTCGGCGACGTCGTCTGCGGCGGGTTTGCCATGCCGATCCGCGAGAACAAAGCCCAGGAAATCTACATTTTCATGTCGGGCGAGAAGATGGCGCTCTACGCCGCCAACAAAATCGCCAAGGGGATTTTTAAATACGCCAATTCCGGGGGCGTCCGCCTGGGTGGGCTGAGTTTCCAAGAGCGCCAAACCGACCGCGAGGTCGACC	Rhizobium sp. 5-1-2Rhizobium sp. 5-1-2
H134	NifH	QNTLAALAQMGHRILIVGCDPKADSTRLILHAKAQDTILSLAAAAGSVEDLEIEEVMKVGYQN	GCAGAATACTCTGGCGGCGTTGGCGCAGATGGGACACCGGATCCTGATCGTCGGCTGCGATCCCAAGGCGGACTCGACCCGCCTGATCCTGCACGCCAAGGCGCAGGACACCATTCTCAGCCTGGCGGCGGCCGCCGGCAGCGTCGAAGACCTCGAGATCGAAGAGGTCATGAAGGTCGGCTACCAGAACA	Bradyrhizobium sp. STM 3843
H135	NifH	NTRAALQQMGHRCRIGGCDPKAASTRLILHAKAQDTILSLAAAAGSVEDLEIEEVMKVGYQN	TGTTCTGGTAGCCGACCTTCATGACCTCTTCGATCTCGAGGTCTTCGACGCTGCCGGCGGCCGCCGCCAGGCTGAGAATGGTGTCCTGCGCCTTGGCGTGCAGGATCAGGCGGGTCGAGGCCGCCTTGGGATCGCAGCCGCCGATACGGCACCGGTGTCCCATCTGCTGCAACGCCGCCCGCGTATTCTGCCTGTCTCTTTTACACACCCTACGCTGCCGCCGAGCTACTCTTCGTGGTTCTTGGCGGTGG	Bradyrhizobium sp. STM 3843
H136	NifH	MAALRQIAFYGKGGIGKSTTSQNTLAALAQMGHRILIVGCDPKADSTRLILHAKAQDTILS	GAAGCGAGTCCGGCGTTGACGCGCGGGCTCATTGGCAATCGGTTCATGGAGAACAAAATGGCTGCACTACGACAAATCGCATTTTACGGCAAAGGCGGCATCGGCAAGTCGACGACCTCGCAGAATACTCTGGCGGCGCTGGCGCAGATGGGGCACCGGATCCTGATCGTCGGCTGCGATCCCAAGGCGGACTCGACCCGCCTGATCCTGCACGCCAAGGCGCAGGACACCATTCTCAGC	Bradyrhizobium sp. BTAi1
H137	NifH	ALRQIAFYGKGGMGKSTTSQNTLAALAQMGHRILIVGCDPKADSTRLILHAKAQDTILS	GCTGAGAATGGTGTCCTGCGCCTTGGCGTGCAGGATCAGGCGGGTCGAGTCCGCCTTGGGATCGCAGCCGACGATCAGGATCCGGTGCCCCATCTGCGCCAGCGCCGCCAGAGTATTCTGCGAGGTCGTCGACTTGCCCATGCCGCCTTTGCCGTAAAATGCGATTTGTCGTAGTGCAGCCCTTTTGTTCTCCATGAACCTATTGCCAATTGGCCCGCGCGCGAACGCCCGGCCCGCTTTCTTGCTCTTAT	Bradyrhizobium sp. BTAi1
H138	NifH	LILHAKAQDTILSLAANAGSVEDLEIEDVMKVGYRDIRCVESGGPEPGVGCAGRGVITSINFLEENGAYEDIDYVSY	GTCTGATCCTGCACGCCAAGGCGCAGGACACCATTCTGAGCCTGGCGGCCAACGCCGGCAGCGTCGAAGACCTCGAAATCGAGGACGTGATGAAAGTCGGCTACCGCGACATCCGCTGCGTCGAGTCCGGCGGCCCGGAGCCGGGCGTCGGCTGCGCTGGCCGTGGCGTCATCACCTCGATCAACTTCCTGGAAGAGAACGGCGCCTATGAGGACATCGACTACGTGTCCTACGA	Lusitaniella coriacea LEGE 07167
H139	NifH	TGLTLHGKAQDTMLSLAANAGSVEDREIEDVMKVGYRDIRCVESGGPEPGVGCAGRGVITSINFLEENGAYEDIDYVSY	TCGTAGGACACGTAGTCGATGTCCTCATAGGCGCCGTTCTCTTCCAGGAAGTTGATCGAGGTGATGACGCCACGGCCAGCGCAGCCGACGCCCGGCTCCGGGCCGCCGGACTCGACGCAGCGGATGTCGCGGTAGCCGACCTTCATCACGTCCTCGATTTCGCGGTCTTCGACGCTGCCGGCGTTGGCCGCCAGGCTCAGCATGGTGTCCTGCGCCTTGCCGTGCAGGGTCAGACCTGTCTCTTATCCAC	Bradyrhizobium sp. TUTAHSA87
H140	NifH	MESNMSSLRQIAFYGKGGIGKST	GTCGTCGATTTGCCGATACCACCCTTGCCGTAAAACGCGATTTGTCTCAGTGAAGACATGTTGCTCTCCATCAACCGATTGCCAATGACTCCGCGCTGCTCGCGCGAGATTGCTTCTCTCTCAGAAGCGTGGGCCCGCGGGGTTCGGGAAGGAGAACATCGCTCGCCAGCAGCGTCGGCGTGTTCTCAGCCCTCACTCGTTGTTGCTGCATCCAAATAGCAACCGTCGTGCCATTCACTGCCGCGTGCA	Bradyrhizobium sp. S23321
H141	NifH	MESNMSSLRQIAFYGKGGIGKSTTSQNTLAALAEMGHKILIVGCDPKADSTRLILHAKAQDTIL	CGCTTCTGAGAGAGAAGCAATCTCGCGCGAACAGCGCGATGTCATTGGCAATCGGTTGATGGAGAGCAACATGTCTTCACTGAGACAAATCGCGTTTTACGGCAAGGGTGGTATCGGCAAATCGACGACGTCGCAGAACACGCTCGCGGCGCTTGCCGAGATGGGTCACAAGATCCTGATCGTCGGCTGCGACCCCAAGGCGGACTCAACCCGCCTGATCCTGCACGCCAAGGCGCAGGACACCATTCTCA	Bradyrhizobium sp. S23321
H142	NifH	WSSLRQIEFYGKGVNGKAPTSQNTLAALAEMGHKILIVGCDPKADSTRLILHAKAQDTILSLAANAGSVEDLELEDVMKVGY	GTAGCCGACCTTCATAACGTCCTCGAGTTCGAGGTCCTCGACGCTGCCGGCGTTGGCCGCCAGGCTGAGAATGGTGTCCTGCGCCTTGGCGTGCAGGATCAGGCGGGTTGAGTCCGCCTTGGGGTCGCAGCCGACGATCAGGATCTTGTGACCCATCTCGGCGAGCGCCGCGAGCGTGTTCTGCGACGTCGGCGCTTTGCCGTTAACACCCTTGCCGTAAAACTCGATTTGTCTCAGTGAAGACCATTTGT	Bradyrhizobium sp. S23321
H143	NifH	INFLEENGAYEDIDYVSYDVLGDVVCGGFAMPIRENKAQEIYIVMSGEMMAMYAANNISKGILKYAN	GAATTGGCGTACTTCAGAATGCCCTTGGAGATGTTGTTGGCGGCATACATCGCCATCATCTCGCCGGACATCACGATGTAGATCTCCTGCGCCTTGTTCTCGCGGATCGGCATCGCGAAGCCGCCGCACACGACATCGCCGAGCACGTCGTAGGAGACGTAGTCGATGTCCTCATAGGCGCCGTTTTCCTCGAGGAAGTTGATC	Rhizobium tropici
H144	NifH	INFLEENGAYADIDYVSYDVLGDVVCGGFSMPIRENKAQEIYIVMSGEMMAMYAANNISTGILKYA	GATCAACTTCCTCGAGGAAAACGGCGCCTATGCGGACATCGACTACGTCTCCTACGACGTGCTCGGCGATGTCGTGTGCGGCGGCTTCTCGATGCCGATCCGCGAGAACAAGGCGCAGGAGATCTACATCGTGATGTCCGGCGAGATGATGGCGATGTATGCCGCCAACAACATCTCCACGGGCATTCTGAAGTACGCCACTTC	Rhizobium tropici
H145	NifH	AEMGHRILIVGCDPKADSTRLILHAKAQDTILSLAAAAGSVEDLEIEEVMKVGYRDIRCVESAGPERGVGCAGRGVIMSFNLL	CGCCGAGATGGGGCACCGCATCCTGATCGTCGGCTGCGATCCCAAGGCGGATTCGACCCGGTTGATCCTGCATGCCAAGGCGCAGGACACCATCCTCAGCCTCGCGGCTGCCGCCGGCAGCGTCGAGGACCTCGAGATCGAGGAGGTCATGAAGGTCGGCTATCGCGATATCCGCTGCGTGGAGTCCGCCGGACCGGAGCGCGGCGTCGGCTGTGCCGGCCGCGGCGTCATCATGTCGTTCAACTTGCTCG	Bradyrhizobium denitrificans LMG 8443
H146	NifH	QAGHYRSLAARIHNNGGKGIIPTPITMDELEDMLMEHGIMKPVDESVVGKT	GCTTAGGTCCGGCCCCTGTTGCGAGGGGCCGGATGTGAGCGATTGATGACCTCAGGCCGCGGCGATTGCGGCTTCGGCGGCGAGTTCGGCGGCGGTCTTGCCGACGACGGATTCGTCGACCGGCTTCATGATGCCGTGCTCCATCAGCATGTCCTCGAGCTCGTCCATGGTGATCGGGGTCGGAATGATGCCCTTGCCGCCATTGTTGTGGATCCTCGCGGCCAGGCTGCGGTAGTGACCGGCCTGGACCG	Bradyrhizobium sp. S23321
H147	NifH	AQEIYIVMSGEMMAMYAANNISKGILKYANSGGVRLGGLNCNRQTDTELELAEARAKKLATPLSYFDPCRTIGQHAQPTRMT	AGGCGCAGGAGATCTACATCGTGATGTCCGGCGAGATGATGGCGATGTATGCCGCCAACAACATCTCCAAGGGCATTCTGAAATACGCCAATTCCGGCGGCGTGCGCCTCGGCGGGCTGAACTGCAACTAGCGCCAGACCGACACGGAGCTCGAGTTGGCCGAAGCGAGGGCCAAGAAGCTCGCCACGCCCCTGAGCTATTTCGATCCGTGCCGCACCATCGGGCAGCACGCGCAACCGACTCGCATGACG	Bradyrhizobium sp. M12
H148	NifH	LGTQLIYFVPRDNIVQHAELRRMTVLEYAPESEQAEHYRKLAHKIHNNGGKGIIPTPITMDALEDMLMEHGIMKAVDESVVGK	GCTCGGCACCCAGCTGATCTACTTCGTGCCGCGCGACAACATCGTGCAGCACGCGGAGCTCCGCCGCATGACGGTGCTGGAATACGCGCCGGAGTCCGAGCAGGCCGAGCACTATCGCAAGCTCGCGCACAAGATCCACAACAACGGCGGCAAGGGCATCATCCCGACCCCGATCACGATGGACGCGCTCGAGGACATGCTGATGGAGCACGGCATCATGAAGGCGGTCGACGAGTCCGTCGTCGGCAAGA	Bradyrhizobium sp. S23321
H149	NifH	MTDDNIRQIAFYGKGGIGKSTTSQNTLAAMAEMGQRIMIVGCDPKADSTRLMLHSKAQTTVLHL	GCCAAGTGCAATACGGTGGTTTGAGCTTTGGAGTGCAGCATCAAACGGGTAGAGTCAGCTTTGGGGTCGCAACCTACAATCATGATGCGCTGACCCATTTCTGCCATAGCTGCCAGGGTGTTTTGGGAGGTGGTAGATTTACCGATACCACCTTTACCGTAGAAAGCTATCTGTCTAATGTTATCGTCAGTCATTGTTCTTTTCCTGCAATTGGTTGGTTGGTTTGGTGGGTCTATTAGTTCTCACGC	Anabaena variabilis
H150	NifH	MTDDNIRQIAFYGKGGIGKSTTSQNTLAAMAEMCQ	GATTATGACACAAAAGCCCACCGAATTTGTTGTGGAGCGATCGCCACCAGCGACGTTCTACATGCGCTCACTGCTGTAGCTCAACAGGCGTGAGAACTAATAGACCCACCAAACCAACCAACCAATTGCAGGAAAAGAACAATGACTGACGATAACATTAGACAGATAGCTTTCTACGGTAAAGGTGGTATCGGTAAATCAACCACCTCCCAAAACACCCTGGCAGCTATGGCAGAAATGTGTCAGCTACA	Anabaena variabilis
H151	NifH	IVMSGEMMAMYAANNISKGILKYANSGGVRLGGLVCNERQTDKELELAEAMAKKLGTQLIY	ACATCGTGATGTCCGGCGAGATGATGGCGATGTATGCCGCCAACAACATCTCCAAAGGCATTCTGAAGTACGCCAATTCCGGCGGCGTGCGCCTGGGCGGGCTGGTCTGCAACGAGCGCCAGACCGACAAGGAGCTCGAGCTGGCCGAAGCCATGGCCAAGAAGCTCGGCACCCAACTGATCTACTT	Bradyrhizobium sp. FVNS22
H152	NifH	LKYANSGGVRLGGLVCNERQTDKELELAEALAKKLGTQLIYFVPRDNIVQHAELRRMTVQE	TTCCTGAACCGTCATGCGGCGCAGCTCCGCGTGCTGCACGATGTTGTCGCGCGGCACGAAGTAGATCAGCTGGGTGCCGAGCTTCTTCGCCAGCGCTTCCGCCAGCTCCAGCTCCTTGTCGGTCTGTCGTTCGTTGCAGACCAGGCCGCCGAGACGCACGCCGCCGGAATTGGCGTATTTCAGAA	Bradyrhizobium sp. S23321
H153	NifH	LKYANSGGVRLGGLVCNERQTDKELELAEALAKKLGTQLIYFVPRDNIVQHAELRRMTVQE	TTCTGAAATACGCCAATTCCGGCGGCGTGCGTCTCGGCGGCCTGGTCTGCAACGAACGACAGACCGACAAGGAGCTGGAGCTGGCGGAAGCGCTGGCGAAGAAGCTCGGCACCCAGCTGATCTACTTCGTGCCGCGCGACAACATCGTGCAGCACGCGGAGCTGCGCCGCATGACGGTTCAGGAA	Bradyrhizobium sp. S23321
H154	NifH	DPKADSTRLILHAKAQDTILSLAANAGSVEDLEIEDVMKVGYRDIRCVESGGPEPGVGCAGRGVITSINFLEENGAYEDVDYV	GTGATCCCAAGGCGGATTCGACTCGCCTGATCCTGCACGCCAAGGCGCAGGACACCATCCTCAGCCTGGCGGCAAATGCCGGCAGCGTCGAGGACCTCGAAATCGAGGATGTCATGAAAGTCGGCTACCGCGACATCCGTTGCGTCGAGTCCGGCGGTCCGGAACCCGGTGTCGGCTGCGCCGGCCGCGGCGTGATCACCTCGATCAACTTCCTGGAAGAGAACGGCGCCTATGAAGACGTCGACTACGTT	Bradyrhizobium sp. S23321
H155	NifH	AAKNISKGILKYANSGGVRLGGMVGKERQTDKELELAEALAKKLGTQLIYFVPRDNIVQHAELRRMTVLEYAPDSKQAEHYR	GTGCGATAGTGTTCCGCTTGCTTCGAGTCGGGCGCATATTCCAGAACCGTCATGCGGCGCAGCTCCGCGTGCTGCACGATGTTGTCGCGCGGAACGAAGTAGATCAGCTGGGTGCCGAGCTTCTTCGCCAGCGCTTCCGCCAGTTCCAGCTCCTTGTCGGTCTGCCGTTCCTTGCCGACCATGCCGCCGAGCCGCACGCCGCCGGAATTGGCGTATTTAAGAATGCCCTTCGAGATGTTTTTGGCCGCAT	Bradyrhizobium sp. S23321
H157	NifH	IDYVSYDVLGDVVCGGFAMPIRENKAQEIYIVMSGEMMAMYAANNISKGILKYANSGGVRLGGLVCNERQTDKELELAEAMAK	CATCGACTACGTGTCCTACGACGTGCTCGGCGACGTGGTGTGCGGTGGCTTCGCGATGCCGATCCGCGAAAACAAGGCGCAGGAAATCTATATCGTGATGTCCGGCGAGATGATGGCGATGTATGCCGCCAACAACATCTCCAAGGGCATTCTGAAGTACGCCAATTCCGGCGGTGTGCGCCTCGGCGGGCTGGTCTGCAACGAGCGCCAGACCGACAAGGAACTCGAGCTTGCCGAAGCCATGGCCAAGA	Bradyrhizobium sp. FVNS22
H158	NifH	IDYVSYDVLGDVVCGGFAMPIRENKAQEIYIVMSGEMMAMYAANNISKGILKYANSGGVRLGGLVCNERQTDKELELAEAMAK	TTCTTGGCCATGGCTTCGGCAAGCTCGAGTTCCTTGTCGGTCTGGCGCTCGTTGCAGACCAGCCCGCCGAGGCGCACACCGCCGGAATTGGCGTACTTCAGAATGCCCTTGGAGATGTTGTTGGCGGCATACATCGCCATCATCTCGCCGGACATCACGATATAGATTTCCTGCGCCTTGTTTTCGCGGATCGGCATCGCGAAGCCACCGCACACCACGTCGCCGAGCACGTCGTAGGACACGTAGTCGAT	Bradyrhizobium sp. FVNS22
H160	NifH	MESNMSSLRQIAFYGKG	AGTATGATCAGATGGTTAAGGCGATCGCCGCGAGTGGCACGCCAGTTGCTATTTGGATGCAGCAACAACGAGTGAGGGCTGAGAGCACGCCGACGCCGCTGGCGAGCGATGTTCTCCTTCCCGAACCCCGTGTGCCCACGTTTCTGCGAGAGAAACAATCTCGCGCGAGCATCGCGCGGAATCATTGGCAATCGGTTGATGGAGAGCAACATGTCTTCACTGAGACAAATCGCGTTTTACGGCAAGGGTGG	Bradyrhizobium sp. S23321
H161	NifH	KADSTLLILSAKAQDTILSLAANAGSVEDLELEDVMKVGYRDIRCVESGGPEPGVGCAGRGVITSINFLEENGAYEDIDYVSY	TCATAGGACACGTAGTCGATGTCCTCATAGGCGCCGTTCTCTTCCAGGAAGTTGATCGAGGTGATGACGCCTCGACCGGCGCAACCAACGCCGGGCTCCGGACCGCCGGACTCGACGCAGCGGATGTCGCGGTAGCCGACCTTCATGACGTCTTCGAGTTCAAGGTCCTCGACGCTGCCGGCGTTGGCCGCCAGGCTCAGAATGGTGTCCTGCGCCTTGGCGGACAGGATCAGCAGGGTCGAGTCCGCCTT	Bradyrhizobium diazoefficiens W1
H162	NifH	AMYAANNISKGILKYANSGGVRLGGLVCNERQTDKELELAESLAKMLGSRLIHFVPRDNIVQHAELRRMTVIEYAPESKQAEE	GGCCATGTACGCGGCCAACAACATCTCCAAGGGCATCCTGAAGTACGCCAACAGCGGCGGCGTGCGCCTGGGCGGCCTGGTGTGCAACGAGCGCCAGACCGACAAGGAACTGGAACTGGCCGAGTCGCTGGCCAAGATGCTGGGCAGCCGGCTCATCCACTTCGTGCCGCGCGACAACATCGTGCAGCACGCCGAGCTGCGCCGCATGACGGTGATCGAGTACGCACCCGAGTCCAAGCAGGCCGAGGAAT	Pseudacidovorax intermedius NH-1
H163	NifH	IVQHAELRRMTVLEYAPDSVQAGHYRSLAEKIHNNGGKGIIPTPITMDELEDMLMEHGIMKAVDESIVGKTAADLAAIA	CATCGTGCAGCACGCCGAGCTGCGCCGCATGACGGTGCTGGAATATGCGCCGGACTCGGTGCAGGCCGGCCACTACCGGAGTCTCGCCGAGAAGATCCACAACAATGGCGGCAAGGGCATCATCCCGACGCCCATTACCATGGACGAGCTCGAGGACATGCTGATGGAGCACGGCATCATGAAGGCGGTCGACGAGTCCATCGTCGGCAAGACCGCCGCCGACCTCGCCGCCATCGCGTAAGGCAGAACA	Bradyrhizobium sp. ORS278
H164	NifH	IVQHAELRRMTVLEYAPESQQAEHYRKLAHKIHNNGGKGIIPTPITMDELEDMLMEHGII	ACATCGTGCAGCACGCGGAGCTGCGCCGCATGACGGTGCTGGAATACGCGCCGGAGTCGCAGCAGGCCGAGCACTATCGCAAGCTCGCGCACAAGATCCATAACAACGGCGGTAAGGGCATCATCCCGACCCCGATCACGATGGACGAGCTCGAGGACATGCTGATGGAGCACGGCATCATTAAGGCTGTCGACGAGTCCGTCGCCGGCCAGACCGCCCCCGCATCCCCCGCCCTGTCGACGTATCCTAC	Bradyrhizobium sp. S23321
H165	NifH	MAALRQIAYYGKGGIGKSTTSQNTLAALVELGQKILIVGCDPKADSTRLILNAKAQDTVLHLAAEQGSVEDL	CGAGATCCTCGACCGACCCTTGCTCGGCGGCCAGATGCAGCACTGTGTCTTGCGCTTTGGCGTTGAGGATGAGGCGCGTCGAGTCGGCTTTCGGGTCGCAGCCGACAATAAGAATCTTCTGGCCGAGCTCCACCAGAGCCGCGAGCGTGTTTTGTGAGGTGGTGGATTTTCCGATGCCGCCCTTCCCGTAGTAGGCTATTTGGCGCAGAGCCGCCATGGCTGTCTCCTTGATCTCTGCCGCGACGGCGG	Rhizobium sp. CNPSo 668
H166	NifH	YDVLGDVVCGGFAMPIRENKAQEIYIVMSGEMMAMYAANNISKGILKYANSGGVRLGGLVCNERQTDKELELAEALAKKLGTQ	GCTGGGTGCCGAGCTTCTTGGCCAGCGCCTCAGCCAATTCCAGCTCCTTGTCGGTCTGGCGCTCGTTGCAGACCAGGCCGCCGAGGCGCACGCCGCCGGAATTAGCGTATTTCAGAATGCCCTTGGAGATGTTGTTGGCGGCGTACATAGCCATCATCTCGCCGGACATCACGATGTAGATTTCCTGCGCCTTGTTCTCGCGGATCGGCATCGCGAAGCCGCCGCAGACGACGTCGCCGAGCACGTCGTAG	Bradyrhizobium sp. FVNS22
H167	NifH	SSLRQIAFYGKGGIGKSTTSQNTLAALAEMGHKILIVGCDPKADSTRLILHAKAQDTTLSMAANAGSAEDLDTAGHTNRGDRG	GTCTTCACTGAGACAAATCGCGTTTTACGGCAAGGGCGGTATCGGCAAATCGACGACGTCGCAGAACACGCTCGCGGCGCTTGCCGAGATGGGTCACAAGATCCTGATCGTCGGCTGCGACCCCAAGGCGGACTCGACCCGCCTGATCCTGCACGCCAAGGCGCAGGACACCACTCTGAGCATGGCAGCCAACGCCGGCAGCGCCGAGGACCTCGACACTGCGGGACACACCAATAGAGGCGACCGCGGAA	Bradyrhizobium sp. DOA9
H168	NifH	RSLAEKIHNNGGKGIIPTPITMDELEDMLM	ACCGGAGTCTCGCCGAGAAGATCCACAACAATGGCGGCAAGGGCATCATCCCGACGCCCATTACCATGGACGAGCTCGAGGACATGCTGATGG	Azorhizobium caulinodans ORS 571
H169	NifH	GSGSVEDLESEEVMKVGRDIKCVESGGPEPGVGCAGRGVITSINFLEENGAYEDIDYVSYDVLGDVVCGGFAMPIRENKAQE	CTCCTGCGCCTTGTTCTCGCGGATCGGCATCGCGAAGCCGCCGCACACGACGTCGCCGAGCACGTCGTAGGACACGTAGTCGATGTCCTCATAGGCGCCGTTCTCTTCCAGGAAGTTGATCGAGGTGATGACGCCGCGGCCGGCGCAGCCGACGCCCGGCTCCGGTCCGCCCGACTCGACGCACTTGATATCGCGCTAGCCGACTTTCATGACCTCTTCGCTCTCGAGGTCCTCGACGCTGCCCGAGCCCG	uncultured bacterium
H170	NifH	NGAYEDIDYVSYDVLGDVVCGGFAMPIRENKAQEIYIVMSGEMMAMYAANNISKGILKYANSGGVRLGGLVCNERQTDKELEL	GCCAGTTCCAGCTCCTTGTCGGTCTGCCGTTCGTTGCAGACCAGGCCGCCGAGACGCACGCCGCCGGAATTGGCATATTTCAAAATGCCCTTCGAGATGTTGTTGGCGGCATACATCGCCATCATCTCGCCGGACATCACGATGTAGATTTCCTGCGCCTTGTTCTCGCGGATCGGCATCGCGAAGCCGCCGCACACGACGTCGCCGAGAACGTCGTAGGACACGTAGTCGATGTCCTCATAGGCGCCGTT	Bradyrhizobium sp. S23321
H171	NifH	LEIEDVMKVGYRDIRCVESGGPEPGVGCAGRGVITSINFLEENGAYEDIDYVSYDVLGDVVCGGFAMPIRENKAKEIYIVMSG	CCTCGAAATCGAGGACGTCATGAAGGTCGGCTACCGCGACATCCGTTGCGTCGAGTCCGGCGGTCCCGAGCCCGGCGTCGGCTGCGCCGGCCGCGGCGTCATCACGTCGATCAACTTCCTCGAAGAGAACGGCGCCTATGAGGACATCGACTACGTGTCCTACGACGTTCTCGGCGACGTCGTGTGCGGCGGCTTCGCGATGCCGATCCGCGAGAACAAGGCGAAGGAAATCTACATCGTGATGTCCGGCG	Bradyrhizobium sp. S23321
H172	NifH	IYIVMTGEMMAMAANNISKGILKYANSGGVRLGGLVCNERQTDKELELAEAMAKKLGTQLIYFVPRDNIVQHAELRRMTVLE	TTCCAGCACCGTCATGCGGCGCAGCTCCGCGTGCTGCACGATGTTGTCGCGCGGCACGAAGTAGATCAGCTGGGTGCCGAGCTTCTTGGCCATGGCTTCCGCCAGCTCCAGCTCCTTGTCGGTCTGCCGTTCGTTGCAGACCAGGCCGCCGAGCCGCACGCCGCCGGAATTGGCGTATTTCAGAATGCCCTTGGAGATGTTGTTGGCGGCCTACATCGCCATCATCTCGCCGGTCATCACGATGTAGATTT	Bradyrhizobium sp. 39S1MB
H173	NifH	VCGGFAMPIREGKAQEIYIVTSGEMMAMYAANNIARGILKYAHSGGVRLGGLICNSRKTDREHELIETLAKRLNTQMIHFV	GTATGTGGTGGTTTCGCTATGCCTATCCGTGAAGGTAAAGCACAAGAAATTTACATCGTTACATCAGGTGAAATGATGGCGATGTACGCTGCAAACAACATCGCTCGTGGTATTTTGAAATACGCTCACTCCGGTGGTGTACGCTTGGGTGGTTTGATTTGTAACAGCCGTAAAACTGACCGGGAACACGAACTCATCGAAACCTTGGCAAAACGGTTGAACACCCAAATGATTCACTTCGTAC	Nostoc sp. NIES-3756
H174	NifH	VSGGFDMPIREGKAQEIYIVTSGEMMAMYAANNIARGILKYAHSGGVRLGGLICNSRKTDREHELIETLAKRLNTQMIHFV	GTACGAAGTGAATCATTTGGGTGTTCAACCGTTTTGCCAAGGTTTCGATGAGTTCGTGTTCCCGGTCAGTTTTACGGCTGTTACAAATCAAACCACCCAAGCGTACACCACCGGAGTGAGCGTATTTCAAAATACCACGAGCGATGTTGTTTGCAGCGTACATCGCCATCATTTCACCTGATGTAACGATGTAAATTTCTTGTGCTTTACCTTCACGGATAGGCATATCGAAACCACCACTTACTTTTCTT	Nostoc sp. NIES-3756
H175	NifH	FVPRDNIVQHAELRRMTVLEYAPESEQAEHYRKLAHKIHNNGGRGIIPTPITMVELEDMLMEHGIMKSGDDSVVGKTAAELT	ACTTCGTGCCGCGCGACAACATCGTGCAGCACGCGGAGCTCCGCCGCATGACGGTGCTGGAATACGCGCCGGAGTCCGAGCAGGCCGAGCACTATCGCAAGCTCGCTCACAAGATCCACAACAACGGCGGCAGGGGCATCATCCCGACCCCGATCACGATGGTCGAGCTCGAGGACATGCTGATGGAGCACGGCATCATGAAGTCGGGCGACGACTCGGTCGTAGGCAAGACCGCCGCAGAACTCACGTGG	Bradyrhizobium sp. S23321
H176	NifH	NGAYEDIHYVSYDVLGDVVCGGFAMPIRENKAQEIYIVMSGEMMAMYAANNISKGILKYANSGGVRLGGLVCNERQTDKELE	AGCTCCAGCTCCTTGTCGGTCTGGCGCTCGTTGCAGACCAGGCCGCCCAGGCGCACGCCGCCGGAGTTCGCATATTTCAGAATGCCCTTCGAGATGTTGTTGGCGGCATACATCGCCATCATCTCGCCGGACATCACGATGTAGATCTCCTGCGCCTTGTTCTCGCGGATCGGCATCGCGAAGCCGCCGCACACGACGTCGCCGAGCACGTCGTAGGACACGTAGTGGATGTCCTCATAGGCGCCGTTCT	Bradyrhizobium oligotrophicum S58
H177	NifH	ILSLAAAAGSVEDLEIEEVMKVGYRDIKCVESGGPEPGVGCAGRGVITSINFLEENGAYEDIDYASYDVLGDVVCGGFAMPIR	ATCCTGAGCCTGGCCGCTGCCGCCGGCAGCGTCGAGGACCTCGAGATCGAAGAGGTCATGAAGGTCGGCTATCGCGACATCAAGTGCGTCGAGTCGGGTGGACCGGAGCCGGGCGTCGGCTGCGCCGGCCGCGGCGTCATCACCTCGATCAACTTCCTGGAAGAGAACGGCGCCTATGAGGACATCGACTACGCTTCCTACGACGTGCTCGGCGACGTGGTCTGCGGCGGCTTCGCGATGCCGATCCGCGA	uncultured bacterium
H178	NifH	MAANTLSKGILKYANSGGVRHGGLVCNARQTDKELELADELAKKLGTKLIYFVPRDNIVQHAELRRMTVLEYAPDSVQAGHY	GTAGTGGCCGGCCTGGACCGAATCCGGTGCGTATTCCAGCACGGTCATGCGCCGCAGCTCGGCGTGCTGCACGATGTTGTCGCGCGGCACGAAGTAGATCAGCTTGGTGCCGAGCTTCTTGGCCAGCTCATCCGCCAGCTCCAGCTCCTTGTCGGTCTGGCGCGCGTTGCAGACCAGACCGCCGTGGCGCACGCCGCCGGAGTTCGCATATTTCAGAATGCCCTTCGAGAGGGTGTTGGCGGCCTACATCG	Bradyrhizobium oligotrophicum S58
H179	NifH	MESNMSSLRQIAFYGKGGIGKS	GTTAAGGCGATCGCCGCGAGTGGCACGCCAGTTGCTATTTGGATGCAGCAACAACGAGTGAGGGCTGAGAGCACGCCGACGCTGCTGGCGAGCGATGTTCTCCTTCCCGAACCCCGTGTGCCCACGTTTCTGCGAGAGAAACAATCTCGCGCGAGCATCGCGCGGAATCATTGGCAATCGGTTGATGGAGAGCAACATGTCTTCACTGAGACAAATCGCGTTTTACGGCAAGGGTGGTATCGGCAAATCGA	Bradyrhizobium sp. S23321
H180	NifH	MESNMSSLRQIAFYGKGGIGKSTTSQNTLAALAEMGHK	CTTGTGGCCCATCTCGGCCAGCGCCGCGAGCGTGTTCTGCGACGTCGTCGATTTGCCGATACCACCCTTGCCGTAAAACGCGATTTGTCTCAGTGAAGACATGTTGCTCTCCATCAACCGATTGCCAATGATTCCGCGCGATGCTCGCGCGAGATTGTTTCTCTCGCAGAAACGTGGGCACACGGGGTTCGGGAAGGAGAACATCGCTCGCCAGCAGCGTCGGCCGGCTCTCAGCCCTACCTCGTTGTTG	Bradyrhizobium sp. S23321
H181	NifH	LLGGPAQRSVLYTLREEGEDVELGDIRAGGFCKSLCVESGGPEPGVGCAGRGIITSINMLEQLDAYKTEKGEDLDYVFYDVLG	GCCCAGCACGTCGTAGAACACGTAGTCGAGGTCCTCGCCCTTCTCGGTTTTGTAGGCGTCGAGCTGCTCGAGCATGTTGATCGACGTGATGATGCCGCGGCCCGCGCAACCAACGCCGGGCTCGGGACCGCCGGACTCGACGCAGAGGCTTTTGCAAAAGCCCCCGGCGCGAATGTCTCCGAGTTCCACGTCCTCACCCTCCTCGCGGAGCGTGTAGAGCACGCTGCGCTGGGCGGGACCGCCGAGCAGCG	uncultured bacterium
H183	NifH	ELRRMTVLEYAPESQQAEHYRKLAHKIHNNGGKGIIPTPITMDELEDMLMEHGIMKAVDESVVGKT	GAGCTGCGCCGCATGACGGTGCTGGAATACGCGCCGGAGTCCCAGCAGGCCGAGCACTATCGCAAGCTCGCGCACAAGATCCACAACAATGGCGGCAAGGGCATCATCCCGACCCCGATCACGATGGATGAGCTCGAGGACATGCTGATGGAGCACGGCATCATGAAGGCGGTGGACGAGTCCGTCGTCGGCAAGACCGCAGCCGAACTCGCCGCCATGTCGGCCTGATCCCTCGTGCCGGCCTCCCCGA	Bradyrhizobium sp. S23321
H184	NifH	LDYVFYDVLGDVVCGGFAMPIREGKAEEIYIVCSGEMMAMYAANNISKGILKFAETGVVRLGGLICN	CCTCGACTACGTGTTCTACGACGTGCTGGGCGACGTCGTTTGCGGCGGATTCGCGATGCCGATCCGCGAGGGCAAGGCCGAGGAAATCTACATCGTCTGCTCCGGCGAGATGATGGCGATGTATGCGGCGAACAACATTAGCAAGGGCATTCTGAAATTCGCGGAGACCGGCGTGGTGCGCCTCGGCGGCCTCATCTGCAAC	Desulfovibrio vulgaris DP4
H185	NifH	LDYVFYDVLGDVVCGGFAMPIREGKAEEIYIVCSGEMMAMYAANNISKGILKFAETGVVRLGGLICN	GTTGCAGATGAGGCCGCCGAGGCGCACCACGCCGGTCTCCGCGAATTTCAGAATGCCCTTGCTAATGTTGTTCGCCGCATACATCGCCATCATCTCGCCGGAGCAGACGATGTAGATTTCCTCGGCCTTGCCCTCGCGGATCGGCATCGCGAATCCGCCGCAAACGACGTCGCCCAGCACGTCGTAGAACACGTAGTCGAGG	Desulfovibrio vulgaris DP4
H186	NifH	CVESGGPEPGVGCAGRGIITSINMLEQLDAYKTEKGEDLDYVFYDVLGDVVCGGFAMPIREGKAEEIYIVCSGEMMAMYAANN	ATGTTGTTCGCCGCATACATCGCCATCATCTCGCCGGAGCAGACGATGTAGATTTCCTCGGCCTTGCCCTCGCGGATCGGCATCGCGAATCCGCCGCAAACGACGTCGCCCAGCACGTCGTAGAACACGTAGTCGAGGTCCTCGCCCTTCTCGGTTTTGTAGGCGTCGAGCTGCTCGAGCATGTTGATCGACGTGATGATGCCGCGGCCCGCGCAACCAACGCCGGGCTCGGGACCGCCGGACTCGACGCA	Opitutaceae bacterium TAV5
H187	NifH	AQRSVLDTLREEGEDVELGDIRAGGFCKSLCVESGGPEPGVGCAGRGIITSINMLEQLDAYKTEKGEDLDYVFYDVLGGVVCG	GCCCAGCGCAGCGTGCTCGACACGCTCCGCGAGGAGGGTGAGGACGTGGAACTCGGAGACATTCGCGCCGGGGGCTTTTGCAAAAGCCTCTGCGTCGAGTCCGGCGGTCCCGAGCCCGGCGTTGGTTGCGCGGGCCGCGGCATCATCACGTCGATCAACATGCTCGAGCAGCTCGACGCCTACAAAACCGAGAAGGGCGAGGACCTCGACTACGTGTTCTACGACGTGCTGGGCGGCGTCGTTTGCGGCGG	uncultured bacterium
H188	NifH	RRMTVLEDAPDSKQADHYRKLAAKVHNNGGKGIIPTPISMDELEDMLMEHGIIKAVDESIIGKTAAEL	TCGCTCGCCTTCGCAAGGCGGCGACTCGCGGCCTTTACGAGGCTGCGAGTTCGGCGGCGGTTTTGCCGATGATTGATTCATCCACGGCCTTTATGATGCCATGCTCCATCAGCATGTCCTCGAGCTCATCCATTGAGATCGGGGTCGGGATGATGCCCTTGCCGCCATTATTGTGAACCTTGGCCGCTAGTTTCCGATAGTGATCAGCCTGCTTGGAATCGGGTGCATCTTCAAGCACCGTCATGCGACG	Bradyrhizobium diazoefficiens NK6
H189	NifH	TRLILHAKAQDTILSLAANAGSVEDLEIEDVMKVGYRDIRCVESGGPEPGVGCAGRGVITSINFLEENGAYEDVDYVSY	TCGTAGGACACGTAGTCGACGTCTTCATAGGCGCCGTTCTCCTCCAGGAAGTTGATCGAGGTGATCACGCCGCGGCCGGCGCAGCCGACACCGGGCTCCGGACCGCCGGACTCGACGCAACGGATGTCGCGGTAGCCGACTTTCATGACATCCTCGATTTCGAGGTCCTCGACGCTGCCGGCATTTGCTGCCAGGCTGAGGATGGTGTCCTGCGCCTTGGCGTGCAGGATCAGGCGGGTGCGGACCCCC	Lusitaniella coriacea LEGE 07167
H190	NifH	GCAGRGVITSINFLEENGAYEDIDYVSYDVLGDVVCGGFAMPIRENKAQEIYIVMSGEMMAMYAANNISKGILKYANSG	CCGCCGGAGTTCGCATATTTCAGAATGCCCTTCGAGATGTTGTTGGCGGCATACATCGCCATCATCTCGCCGGACATGACGATGTAGATCTCCTGCGCCTTGTTCTCGCGGATCGGCATGGCGAAGCCGCCGCACACGACGTCGCCGAGCACGTCGTATGATACGTAGTCGATGTCCTCATAGGCGCCGTTCTCTTCCAGGAAGTTGATCGAGGTGATGACGCCGCGGCCGGCGCAGCCG	Bradyrhizobium oligotrophicum S58
H191	NifH	GCAGRGVITSINFLEENGAYEDIDYVSYDVLGDVVCGGFAMPIRENKAQEIYIVMSGEMMAMYAANNISKGILKYANSG	CGGCTGCGCCGGCCGCGGCGTCATCACCTCGATCAACTTCCTGGAAGAGAACGGCGCCTATGAGGACATCGACTACGTATCATACGACGTGCTCGGCGACGTCGTGTGCGGCGGCTTCGCCATGCCGATCCGCGAGAACAAGGCGCAGGAGATCTACATCGTCATGTCCGGCGAGATGATGGCGATGTATGCCGCCAACAACATCTCGAAGGGCATTCTGAAATATGCGAACTCCGGCGG	Bradyrhizobium oligotrophicum S58
H192	NifH	VLKTGYKGIKCVESGGPEPGVGCAGRGVITSINFLEENGAYDDVDYVSYDVLGDVVCGGFAMPIRENKAQEIYIVMSCEMMAL	GTCCTCAAGACCGGATACAAAGGCATCAAGTGCGTTGAGTCCGGCGGCCCCGAGCCGGGCGTCGGTTGCGCCGGCCGCGGCGTCATCACCTCGATCAACTTCCTCGAGGAGAACGGCGCTTATGACGACGTCGACTATGTCTCCTACGACGTCCTCGGCGACGTCGTCTGCGGCGGCTTTGCCATGCCGATCCGCGAGAACAAGGCGCAGGAGATCTATATCGTCATGTCCTGCGAAATGATGGCGCTCT	Rhizobium sp. JPY735
H193	NifH	GPEPGVGCAGRGVITSINFLEENGAYENIDYVSYDVLGDVVCGGFAMPIRENKAQEIYIVMSGDMMAMYAANNISKGILKYAN	GGCCCTGAGCCAGGTGTCGGCTGCGCCGGCCGCGGTGTCATCACCTCGATCAATTTTCTTGAAGAGAACGGAGCCTACGAGAACATTGACTATGTTTCTTACGATGTGCTTGGCGACGTTGTTTGCGGTGGCTTTGCGATGCCAATCCGCGAAAACAAGGCGCAGGAGATCTACATCGTGATGTCTGGTGACATGATGGCAATGTATGCCGCAAACAATATTTCTAAGGGGATCCTGAAATACGCTAACT	Bradyrhizobium japonicum PV1.15
H194	NifH	IYIVMSGEMMAMYAANNISKGILKYANSGGVRLGGLVCNERQTDKELELADALAKKLGTKLIYFVPRDNIVQHAELRRMTVLE	GATCTACATCGTGATGTCCGGCGAGATGATGGCGATGTATGCCGCCAACAACATCTCGAAGGGCATTCTGAAATATGCGAACTCCGGCGGCGTGCGCCTGGGCGGCCTGGTCTGCAACGAGCGCCAGACCGACAAGGAGCTGGAGCTGGCGGATGCGCTCGCCAAGAAGCTCGGCACCAAGCTGATCTACTTCGTGCCGCGCGACAACATCGTGCAGCACGCCGAGCTGCGCCGCATGACCGTGCTGGAA	Bradyrhizobium oligotrophicum S58
H195	NifH	IYIVMSGEMMAMYAANNISKGILKYANSGGVRLGGLVCNERQTDKELELADALAKKLGTKLIYFVPRDNIVQHAELRRMTVLE	TTCCAGCACGGTCATGCGGCGCAGCTCGGCGTGCTGCACGATGTTGTCGCGCGGCACGAAGTAGATCAGCTTGGTGCCGAGCTTCTTGGCGAGCGCATCCGCCAGCTCCAGCTCCTTGTCGGTCTGGCGCTCGTTGCAGACCAGGCCGCCCAGGCGCACGCCGCCGGAGTTCGCATATTTCAGAATGCCCTTCGAGATGTTGTTGGCGGCATACATCGCCATCATCTCGCCGGACATCACGATGTAGATC	Bradyrhizobium oligotrophicum S58
H196	NifH	SSLRQIAFYGKGGIGKSTTSQNTLAALAEMGHKILIVGCDPKADSTRLILHAKAQDTILSLAANAGSVEDLEIEDVMKVGYR	TGTCTTCACTGAGACAAATCGCGTTTTACGGCAAGGGCGGTATCGGCAAGTCGACGACCTCGCAGAACACGCTGGCTGCGCTGGCGGAGATGGGCCACAAGATCCTGATCGTCGGCTGCGATCCCAAGGCGGATTCGACCCGCCTGATCCTGCACGCCAAGGCGCAGGATACGATCCTGAGCCTGGCGGCAAATGCCGGCAGCGTCGAGGACCTCGAAATCGAGGATGTCATGAAAGTCGGCTACCGCGA	Bradyrhizobium oligotrophicum S58
H197	NifH	FEDVMKVGYSDIRCVESGGPEPGVGCAGRGVITSINFLEENGAYEDIDYVSYDVLGDVVCGGFAMPIRENKAQEIYIVMSGEM	CATCTCGCCGGACATCACGATGTAGATTTCCTGCGCCTTGTTCTCTCGGATCGGCATCGCGAAGCCGCCGCACACGACGTCGCCGAGAACGTCGTAGGACACGTAGTCGATGTCCTCATAGGCACCGTTCTCTTCCAGGAAGTTGATCGAGGTGATGACGCCGCGGCCGGCGCAGCCGACACCGGGTTCCGGACCGCCGGACTCGACGCAACGGATGTCGCTGTAGCCGACTTTCATGACATCCTCGAATT	Bradyrhizobium sp. S23321
H198	NifH	ILKYAHSGGVRLGGLICNSRKVDREIELIETLAERLNTQMIHFVPRDNIVQHAELRRMTVNEYAPDSNQSNEYRALAKKIINN	ATTCTTAAGTATGCTCACTCCGGCGGCGTGCGTTTGGGTGGTTTGATTTGTAACAGCCGTAAAGTTGACCGGGAAATCGAATTGATCGAAACTTTGGCTGAACGTTTGAACACTCAAATGATTCACTTCGTACCCCGCGACAACATCGTTCAACACGCTGAATTGCGCCGGATGACTGTTAACGAGTACGCACCTGACAGCAACCAATCTAACGAATACCGCGCGTTAGCTAAGAAGATCATCAACAACCA	Nostocales cyanobacterium HT-58-2
H201	NifH	IYFVPRDNIVQHAELRRMTVLEYAPDSVQAGHYRSLATKINAKGGKGIIPTPITLAELEDMLLEHGILKALYDSIVGRTAAE	GATCTACTTCGTGCCGCGCGACAACATCGTGCAGCACGCCGAGTTGCGCCGCATGACGGTGCTGGAATATGCGCCTGACTCGGTGCAGGCCGGCCACTACCGCTCGCTCGCCACCAAGATCAACGCCAAGGGCGGCAAGGGCATCATCCCTACCCCGATCACCTTGGCCGAACTAGAGGACATGCTGCTGGAGCACGGCATCCTGAAGGCGCTGTACGATTCCATAGTCGGCAGGACTGCCGCGGAGCATG	Bradyrhizobium sp. ORS278
H202	NifH	MSSLRQIAFYGKGGIGKSTTSQNTLAALAEMGHKILIVGCDPKADSTRLILHAKAQDTILSLAAN	GATCATGAGAGAGCGCACGCCGGGCGATCAGCATCGGCTGAAGGAGAAGCAACATGTCTTCACTGAGACAAATCGCGTTTTACGGCAAGGGCGGTATCGGCAAGTCGACGACGTCGCAGAACACGCTGGCTGCGCTGGCGGAGATGGGCCACAAGATCCTGATCGTCGGCTGCGATCCCAAGGCGGACTCGACCCGCCTGATCCTGCACGCCAAGGCGCAGGACACCATCCTCAGCCTGGCAGCAAATGC	Bradyrhizobium sp. S23321
D101	NifD	VMLFVGGLRPRHVIGAYEDLGMEVVGTGYEFGHNDDYQRTAQHYVKDGTLIYDDVTGYEFERFVEKIQPDLVGSGIKEKYVFQ	CCGTGATGCTGTTCGTCGGCGGCCTGCGTCCTCGCCACGTGATCGGCGCCTATGAGGACCTCGGCATGGAAGTGGTCGGGACCGGCTATGAGTTTGGTCACAACGACGACTATCAGCGCACCGCCCAGCACTACGTCAAGGACGGCACGCTGATCTACGACGACGTCACCGGCTACGAATTCGAGCGTTTCGTCGAGAAGATCCAGCCGGACCTCGTCGGCTCCGGCATCAAGGAGAAGTACGTCTTCCAG	Bradyrhizobium sp. S23321
D102	NifD	MSLATTQSVAEIKARNKQLIDEVLKVYPEKTAKRRAKHLNVHEAGKSDCGVKSNLKSIPGVMTIRGCAYAGSKGVVW	CCACACCACACCCTTGGAACCGGCATAGGCGCAGCCGCGGATCGTCATCACGCCCGGGATGGATTTCAGGTTGGACTTGACGCCGCAATCCGACTTCCCGGCCTCGTGCACGTTGAGATGCTTGGCGCGGCGCTTGGCGGTCTTCTCCGGATAGACCTTCAAGACCTCATCGATCAGCTGCTTGTTGCGCGCCTTGATCTCGGCGACGCTCTGGGTGGTTGCTAGGCTCATACGAATATCCCTCGATCTTT	Bradyrhizobium sp. BTAi1
D103	NifD	MSLATTQSVAEIKARNKQLIDEVLKVYPEKTAKRRAKHLNVHEAGKSDCGVKSNLKSIP	GGTCGACGCCACGTCCGGCGCTTCGGAGGAAGCGCCGGCCCTTCATTACAGAGGAAAGATCGAGGGATATTCGTATGAGCCTAGCAACCACCCAGAGCGTCGCCGAGATCAAGGCGCGCAACAAGCAGCTGATCGATGAGGTCTTGAAGGTCTATCCGGAGAAGACCGCCAAGCGCCGCGCCAAGCATCTCAACGTGCACGAGGCCGGGAAGTCGGATTGCGGCGTCAAGTCCAACCTGAAATCAATCCCG	Bradyrhizobium sp. BTAi1
D104	NifD	MSLATTQSVAEIKARNKELSDEVLKVYPEKTAKRRAKHLNVHEAGKSDCGVKSNLKSIPGVMTIRGCAYAGSK	CCCTTGGATCCGGCGTAGGCGCAGCCGCGAATGGTCATCACGCCGGGGATGGACTTGAGGTTCGACTTGACGCCGCAGTCGGACTTGCCGGCCTCGTGCACGTTGAGGTGCTTGGCGCGACGCTTGGCGGTCTTCTCCGGATAGACCTTCAAGACCTCGTCGCTCAGTTCCTTGTTGCGGGCCTTGATCTCTGCGACGCTCTGTGTGGTTGCTAGGCTCATACGAATACCCTCCGGTTATTCTCTTTGTGA	Bradyrhizobium sp. Aec12.3
D110	NifD	VGCGQYSWAARRNYYIGTTGIDTFVTMQFTSDFQEKDIVFGGDKKLAKIMDEIQELFPLNNGITVQSECPIGLIGDDIEAVSK	CTTGGAGACCGCTTCGATGTCGTCGCCGATGAGACCGATCGGGCACTCGGACTGAACCGTGATGCCATTGTTCAGCGGGAACAGCTCCTGGATTTCGTCCATGATCTTGGCGAGCTTCTTGTCGCCGCCGAAGACAATGTCCTTTTCCTGGAAGTCTGACGTGAACTGCATCGTCACGAAGGTGTCGATGCCGGTCGTGCCGATGTAATAGTTGCGGCGCGCCGCCCACGAATACTGACCGCAGCCAACCG	Methylocella silvestris BL2
D111	NifD	DCGVKSNIKSIPGVMTIRGCAYAGSKGVVWGPIKDMIHISHGPVGCGQYSWAARRNYYIGTTGIDTFVTIQFTSDFQEKDIVF	CCGACTGCGGCGTGAAATCGAACATCAAGTCGATCCCCGGTGTGATGACCATCCGCGGCTGCGCCTATGCCGGCTCGAAGGGCGTGGTCTGGGGTCCGATCAAGGACATGATCCACATCAGCCACGGCCCGGTTGGCTGCGGTCAGTATTCGTGGGCGGCGCGCCGCAACTATTACATCGGCACGACCGGCATCGACACCTTCGTGACGATTCAGTTCACGTCAGACTTCCAGGAAAAGGACATTGTCTTT	Bradyrhizobium sp. S23321
D112	NifD	HTPNDGTRVWVFDTLPADAAPRFEPSAYDVAIIGDYNIGGDAWSSRILLEEMGLRVIAQWSGDGSLAELEATPKAKLNVLHCY	GTAGCAGTGCAGCACGTTGAGCTTCGCCTTCGGCGTTGCCTCGAGCTCCGCCAGCGAGCCGTCGCCCGACCACTGCGCGATCACGCGCAGGCCCATCTCCTCGAGCAGGATGCGCGACGACCAGGCGTCGCCGCCGATATTGTAGTCGCCGATGATCGCGACGTCGTAGGCCGACGGCTCGAAGCGCGGGGCGGCATCGGCGGGGAGCGTATCGAAAACCCAGACCCGGGTCCCGTCGTTGGGGGTGTGGG	Methylobacterium sp. C1
D113	NifD	FQEKDIVFGGDKKLAKIMDEIQELFPLNNGITVQSECPIGLIGDDIEAVSKVKSKEYDGKTIVPVRCEGFRGVAQSLVHHLLN	TTCCAGGAGAAGGACATCGTGTTCGGCGGCGACAAGAAGCTCGCCAAGATCATGGACGAGATCCAGGAGCTGTTCCCGCTGAACAACGGCATCACCGTGCAGTCGGAATGCCCGATCGGCCTGATCGGCGACGACATCGAGGCGGTCTCCAAGGTCAAGTCGAAGGAGTATGACGGCAAGACCATCGTCCCGGTCCGCTGCGAAGGCTTCCGCGGTGTCGCTCAGTCGCTCGTCCACCACCTCCTCAACC	Bradyrhizobium japonicum J5
D114	NifD	GQYSWAARRNYYIGTTGIDTFVTMQFTSDFQEKDIVFGGDKKLAKIMDEIQELFPLNNGITVQSECPIGLIGDDIEAVSKQKS	GGTCAATACTCCTGGGCGGCCCGGCGCAACTATTACATCGGAACGACGGGCATCGACACCTTCGTGACTATGCAGTTCACATCCGACTTCCAGGAAAAGGACATCGTCTTCGGCGGCGACAAGAAGCTCGCCAAGATCATGGACGAAATCCAGGAGCTGTTTCCGCTCAACAACGGCATCACCGTGCAGTCGGAATGCCCGATCGGTCTGATCGGTGACGACATCGAGGCGGTTTCCAAGCAGAAATCCAA	Bradyrhizobium japonicum J5
D115	NifD	KIASLFDDKIKEGAERVIAKYQPLMDAVIAKYRPRLEGKTVMLFVGGLRPRHVIGAYEDLGMEVVGTGYEFGHNDDYQRTAQH	GTGCTGTGCAGTGCGCTGATAGTCGTCGTTGTGGCCAAACTCATAGCCGGTTCCGACAACCTCCATGCCAAGATCCTCATAGGCGCCGATCACATGGCGGGGACGCAAGCCGCCGACGAACAGCATCACGGTCTTGCCTTCCAGCCGGGGCCGGTACTTGGCGATCACCGCATCCATCAGCGGCTGATACTTGGCGATGACGCGCTCGGCGCCTTCCTTGATCTTGTCGTCGAATAAGCTTGCGATCTTG	Uncultured bacterium
D116	NifD	PVGCGQYSWGTRRNYATGTQGVDAFGVLQVTSDFVEKDIVFGGDKKLENICREITEVFPLSKGISIQSACPVGLIGDDIEAVG	CCCGTCGGCTGCGGCCAGTACAGCTGGGGCACCCGCCGGAACTATGCCACCGGCACCCAAGGCGTCGATGCCTTCGGCGTGCTGCAAGTCACCAGCGACTTCGTCGAGAAGGACATCGTCTTCGGCGGCGACAAGAAGCTGGAGAACATCTGCCGGGAGATCACGGAAGTATTCCCGTTGTCGAAGGGCATCTCGATCCAATCCGCGTGTCCGGTCGGTCTGATCGGCGACGATATCGAAGCCGTAGGCAA	Bradyrhizobium oligotrophicum S58
D117	NifD	DIVFGGDKKLAKIMDEIQELFPLNNGITVQSECPIGLIGDDIEAVSKSKSKEYDGKTIVPVRCEGFRGVSQSLGHHIANDAIR	GGACATTGTCTTCGGCGGCGACAAGAAGCTCGCCAAGATCATGGACGAAATCCAGGAGCTGTTCCCGCTGAACAATGGCATCACGGTTCAGTCCGAGTGCCCGATCGGTCTCATCGGCGACGACATCGAAGCGGTCTCCAAGAGCAAGTCGAAGGAATACGACGGCAAGACGATTGTTCCGGTTCGCTGCGAAGGCTTCCGCGGCGTGTCGCAGTCGCTCGGCCACCACATCGCGAACGACGCAATCCGCG	Rhizobium sp. N741
D124	NifD	DKAAKRRKKHLSVATSRDEPGDEPKALSECDVKSNIKSIPGVAHAQDPAFQGKKRVKYM	AGACAAGGCGGCGAAGCGCCGCAAGAAGCACCTCAGCGTCGCAACGAGCCGCGACGAGCCTGGCGATGAGCCGAAGGCCCTTTCCGAATGCGACGTCAAATCGAACATCAAGTCCATTCCGGGCGTGGCACATGCCCAATAGGACCCAGCTTTCCAGGGAAAAAAACGTGTCAAATATTGAATGTGAACGTAACACGGACTGCAGGCGAAAGTCTTTGCGTGGACCGTCGCCGATTTTCGTTCCGACCACA	Bradyrhizobium sp. S23321
D127	NifD	EYGGKTIVPVRCEGFRGVSQSLGHHIANDAVRDWIFGHIEAEGKPKFEPTPYDVAIIGDYNIGGDAWSSRILLEEIGLR	GAATATGGAGGCAAGACCATCGTGCCGGTCCGTTGTGAGGGCTTTCGGGGTGTGTCGCAGTCACTAGGCCATCACATTGCAAACGATGCGGTACGCGATTGGATTTTCGGGCATATCGAGGCCGAGGGCAAACCAAAGTTCGAGCCGACACCATACGATGTTGCGATCATCGGAGACTACAATATCGGCGGCGATGCTTGGTCATCGCGAATTCTGCTTGAAGAGATTGGACTACGGG	Bradyrhizobium japonicum J5
D128	NifD	TTQSVAEIKARNKQLIDEVLKVYPEKTAKRRAKHLNVHEAGKSDCGVKSNLKSIPGVMTIRGCAYAGSKGVVWGPIKDMIHIS	GGCTGATATGGATCATGTCCTTGATCGGGCCCCACACCACGCCCTTGGAGCCGGCATAGGCGCAGCCCCGGATGGTCATGACGCCGGGGATGGACTTCAGATTGGACTTGACGCCGCAATCCGACTTGCCGGCCTCATGGACGTTGAGATGCTTGGCGCGACGCTTGGCGGTCTTCTCCGGATAGACCTTCAAGACCTCATCGATCAGTTGCTTGTTGCGGGCCTTGATCTCCGCGACGCTCTGGGTGGTT	Bradyrhizobium sp. S23321
D132	NifD	YHIPWLEYNFFGPTKIAESLREIASKFDEKIQANAEKVIAKYQPTMDAIVSKYRPRLE	TTCCAAGCGGGGGCGATACTTAGAAACGATCGCATCCATTGTTGGCTGATACTTGGCAATTACCTTCTCAGCGTTTGCTTGGATTTTCTCGTCAAACTTAGAAGCGATTTCCCGTAAGGATTCAGCAATCTTGGTGGGGCCGAAGAAATTGTACTCAAGCCAGGGTATATGGTAGATTAAAGCCTAAAACCGTTATATATCAATAGTTTTACAAGTCTGAGTTTTGTGTGGCTT	Calothrix sp. PCC 7507
D134	NifD	REYGAKPTVPVRCEGFRGVPQLLGHHIANDAVRDWIFGYIEDEGKPKFEPTPYDVAIIGDYNIGGDAWSSRILLEEMGLR	CCCGTAGTCCCATCTCTTCAAGCAGAATTCGCGATGACCAAGCATCGCCGCCGATATTGTAGTCTCCGATGATCGCAACATCGTATGGTGTCGGCTCGAACTTTGGTTTGCCCTCGTCCTCGATATACCCGAAAATCCAATCGCGTACCGCATCGTTTGCAATGTGATGGCCTAGTAACTGCGGCACACCCCGAAAGCCCTCACAACGGACAGGAACGGTGGGCTTGGCACCATATTCTCGTCCCTATTAA	Bradyrhizobium japonicum J5
D135	NifD	DDIEAVSKVKSKEYEGKTIVPVRCEGFRGVSQSLGHHIANDAVRDWIFDKISPEAKPTFEPTPYDVAIIGDYNIGGDAWSSRI	GGATGCGGGAGGACCAGGCGTCGCCACCGATATTGTAGTCACCGATGATCGCGACGTCGTAGGGCGTCGGCTCGAATGTCGGCTTGGCCTCCGGAGAGATCTTGTCGAAGATCCAGTCGCGCACGGCGTCGTTTGCAATGTGGTGACCGAGCGATTGCGAGACGCCACGGAAGCCCTCGCAGCGCACCGGCACGATAGTCTTGCCTTCATACTCCTTCGACTTCACCTTCGAGACCGCCTCGATGTCGTCG	Bradyrhizobium sp. S23321
D136	NifD	PGVMTIRGCAYAGSKGVVWGPIKDMIHISHGPVGCGQYSWAARRNYYIGTTGIDTFVTMQFTSDFQEKDIVFGGDNKLAKII	TCCCCGGCGTCATGACCATCCGGGGCTGCGCCTATGCCGGTTCCAAAGGCGTGGTGTGGGGCCCGATCAAGGACATGATCCATATCAGCCATGGCCCGGTTGGCTGCGGGCAGTATTCCTGGGCTGCGCGCCGGAACTACTACATCGGCACGACCGGCATCGACACCTTCGTGACCATGCAGTTCACCTCCGACTTCCAGGAGAAGGACATCGTGTTCGGTGGCGACAACAAGCTCGCCAAGATAATCGA	Bradyrhizobium sp. S23321
D138	NifD	FVTLQFTSDLQEKDIVFGGDKKLDKILDEIQELFPLNNGITIQSECPVGLIGDDIEAVSRAKSKEYGGKTIVPVRCE	CCCTCACAACGGACCGGCACGATGGTCTTGCCTCCATATTCTTTGGATTTCGCCCTTGACACCGCCTCGATATCGTCACCGATCAACCCTACCGGGCACTCTGATTGTATCGTAATGCCGTTGTTGAGTGGAAACAGCTCTTGGATTTCATCAAGGATTTTGTCCAGTTTCTTGTCGCCGCCAAATACGATATCCTTTTCCTGTAAGTCGGAGGTGAACTGCAGAGTCACGAAG	Bradyrhizobium diazoefficiens USDA 122
D139	NifD	VTLQFTSDFQEKDIVFGGDKKLDKILDEIQELFPLNNGITIQSECPVGLIGDDIEAVSRAKSKKYCKTSRPVRVDGW	CTTCGTGACTCTGCAGTTCACCTCCGACTTCCAGGAAAAGGATATCGTATTTGGCGGCGACAAGAAACTGGACAAAATCCTTGATGAAATCCAAGAGCTGTTTCCACTCAACAACGGCATTACGATACAATCAGAGTGCCCGGTAGGGTTGATCGGTGACGATATCGAGGCGGTGTCAAGGGCGAAATCCAAAAAATATTAGTGCAAGACCAGCAGGCCGGTGCGTGTAGACGGGTGGTATTTATAACAAA	Bradyrhizobium diazoefficiens USDA 122
D140	NifD	VLKAYPEKMAKRRAKHLGTFEEGKPDCGVKSNIKSLPGVMTIRGCAYAGSKGVVWGPIKDMIHISHGPVGCGQYSWAARRNYY	GTGCTGAAGGCCTATCCCGAGAAGATGGCCAAGCGGCGCGCCAAGCACCTGGGTACGTTCGAAGAAGGCAAGCCCGACTGCGGCGTGAAATCCAACATCAAGTCGCTGCCCGGCGTCATGACCATCCGCGGCTGTGCCTATGCCGGCTCCAAGGGCGTGGTCTGGGGCCCGATCAAGGACATGATCCACATCAGCCACGGCCCGGTCGGCTGCGGCCAGTATTCGTGGGCCGCGCGCCGCAACTACTACAT	Variovorax sp. HW608
D141	NifD	HLGTFEEGKPDCGGKSNIKSLPGVMTIRGCAYAGSKGVVWGPIKDMIHISHGPVGCGQYSWAARRNYYIGTTGIDTFVTMQFT	GAGGTGAACTGCATCGTCACGAAGGTGTCGATGCCGGTGGTGCCGATGTAGTAGTTGCGGCGCGCGGCCCACGAATACTGGCCGCAGCCGACCGGGCCGTGGCTGATGTGGATCATGTCCTTGATCGGGCCCCAGACCACGCCCTTGGAGCCGGCATAGGCACAGCCGCGGATGGTCATGACGCCGGGCAGCGACTTGATGTTGGATTTCCCGCCGCAGTCGGGCTTGCCTTCTTCGAACGTACCCAGGTG	Variovorax sp. HW608
D142	NifD	HYVKDGTLIYDDVTGYEFEKFVEKVQPDLVGSGIKEKYVFQKMGVPFRQMHSWDYSGPYHGYDGFAIFARDMDMAINSPVWKM	GCACTACGTCAAGGACGGCACGCTGATCTATGACGACGTGACCGGCTACGAGTTCGAGAAGTTCGTCGAGAAGGTCCAGCCGGACCTGGTCGGATCGGGCATCAAGGAAAAGTACGTGTTCCAGAAGATGGGCGTGCCGTTCCGCCAGATGCATTCCTGGGACTATTCGGGTCCCTATCACGGCTATGACGGATTCGCGATCTTCGCCCGCGACATGGACATGGCCATCAACTCGCCGGTCTGGAAGATGG	Bradyrhizobium oligotrophicum S58
D143	NifD	YDVAIIGDYNIGGDAWSSRILLEEMGLRVVAQWSGDGSLAELEATPKAKLNVLHCYRSMNYISRHMEEKYGIPWCEYNFFGP	GCCTACGACGTCGCGATCATCGGCGACTACAACATCGGCGGCGACGCCTGGTCGTCGCGCATCCTGCTCGAGGAGATGGGCCTGCGCGTGGTCGCCCAGTGGTCGGGCGACGGATCGCTGGCGGAGCTCGAGGCAACGCCGAAGGCGAAGCTCAACGTGCTGCACTGCTACCGCTCGATGAACTACATCTCGCGTCACATGGAAGAGAAGTACGGAATTCCGTGGTGCGAGTACAACTTCTTCGGGCCGAG	Bradyrhizobium sp. ORS278
D144	NifD	LLEEMGLRVVAQWSGDGSLAELEATPKAKLNVLHCYRSMNYISRHMEEKYGIPWCECNFFGPSKIAESLRKIASYFDDKIKEG	GCACCCTCCTTGATCTTGTCGTCGAAATAGCTGGCGATCTTGCGCAGTGATTCGGCGATCTTGCTCGGCCCGAAGAAGTTGCACTCGCACCACGGAATACCGTACTTCTCTTCCATGTGACGCGAGATGTAGTTCATCGAGCGGTAGCAGTGCAGCACGTTGAGCTTCGCCTTCGGCGTTGCCTCGAGCTCCGCCAGCGATCCGTCGCCCGACCACTGGGCGACCACGCGCAGGCCCATCTCCTCGAGCAG	Bradyrhizobium sp. ORS278
D145	NifD	VFQKMGVPFRQMHSWDYSGPYHGYDGFAIFARDMDMAINSPVWKMAQPPWKRKPQPLLQAAE	GTGTTCCAGAAGATGGGCGTGCCGTTCCGCCAGATGCACTCGTGGGACTACTCGGGTCCGTATCACGGCTATGACGGGTTTGCGATCTTCGCGCGCGACATGGACATGGCCATCAACTCGCCGGTCTGGAAGATGGCGCAGCCGCCGTGGAAGCGGAAGCCGCAGCCGCTGCTGCAGGCCGCCGAGTAAGACGTACCACTGCCCTACGGCCCTCCCTCGATGGAGGGCCGGAGCTCCTGATCGACAAAGGG	Bradyrhizobium oligotrophicum S58
D146	NifD	QSIAEIKARNKELIEEVLKVYPEKTAKRRAKHLNVHEAGKSDCGVKSNIKSVPGVMTIRGCAYAGSKGVVWGPIKDMIHISHG	GGCCATGGCTGATGTGGATCATGTCCTTGATCGGCCCCCAGACCACACCCTTCGAGCCGGCGTAGGCACAGCCGCGGATCGTCATCACGCCGGGAACCGACTTGATGTTCGATTTCACGCCGCAGTCGGATTTACCGGCTTCGTGCACGTTCAAGTGCTTGGCGCGGCGCTTCGCGGTCTTCTCCGGATAGACCTTCAATACCTCTTCGATCAGTTCCTTGTTGCGAGCCTTGATCTCGGCAATGCTCTG	Azorhizobium caulinodans ORS 571
D147	NifD	KSDCGVKSNIKSVPGVMTIRGCAYAGSKGVVWGPIKDMIHISNGPVGCGQYSWAARRNYSIGTTGID	AAGTCCGACTGCGGCGTGAAGTCGAACATCAAGTCGGTTCCCGGCGTGATGACGATCCGCGGCTGCGCCTATGCTGGCTCGAAGGGCGTGGTGTGGGGTCCGATCAAGGACATGATCCACATCAGCAACGGCCCGGTCGGCTGCGGTCAGTACTCCTGGGCGGCCCGGCGTAACTATTCCATCGGCACCACCGGCATAGACAC	Bradyrhizobium sp. ORS278
D149	NifD	YEGKTIVPVRCEGFRGVSQSLGHHIANDAVRDWIFDKISPEAKPAFEATPYDVAIIGDYNIGGDAWSSRILLEEMGLLVIAQW	GTATGAGGGCAAGACCATCGTCCCGGTGCGGTGCGAAGGCTTCCGCGGCGTTTCGCAGTCGCTCGGCCACCACATCGCCAACGACGCGGTGCGCGACTGGATCTTCGACAAGATCTCGCCGGAGGCCAAACCGGCATTCGAGGCAACGCCCTACGACGTCGCGATCATCGGCGACTACAATATCGGCGGCGATGCCTGGTCCTCCCGCATCCTGCTGGAGGAGATGGGCCTGCTCGTGATCGCACAGTGGT	Bradyrhizobium sp. ztm3
D150	NifD	AHISHGPIGCGQYSRAGRRNYYTGVSGVDSFGTLNFTSDFQE	GGCCCATATCTCGCACGGCCCCATCGGCTGCGGCCAGTACTCGCGCGCCGGACGGCGCAACTACTATACCGGCGTCAGCGGTGTCGACAGCTTCGGCACCCTGAACTTCACCTCTGATTTTCAGGAG	Klebsiella quasipneumoniae ATCC 700603
D151	NifD	AHISHGPIGCGQYSRAGRRNYYTGVSGVDSFGTLNFTSDFQE	CTCCTGAAAATCAGAGGTGAAGTTCAGGGTGCCGAAGCTGTCGACACCGCTGACGCCGGTATAGTAGTTGCGCCGTCCGGCGCGCGAGTACTGGCCGCAGCCGATGGGGCCGTGCGAGATATGGGCC	Klebsiella quasipneumoniae ATCC 700603
D152	NifD	SFFDDNIKEGAERVIAKYQPLMDAVIAKYRPRLEGKTVMLFVGGLRPRHVIGAYEDLGMEVVGTGYEFGHNDDYQRTAQHYVK	CCTTGACGTAGTGCTGTGCAGTGCGCTGATAGTCGTCGTTGTGGCCAAACTCATAGCCGGTTCCGACAACCTCCATGCCAAGATCCTCATAGGCGCCGATCACATGGCGGGGACGCAAGCCGCCGACGAACAGCATCACGGTCTTGCCTTCCAGCCGAGGCCGGTACTTGGCGATCACCGCATCCATCAGCGGCTGATACTTGGCGATGACGCGCTCGGCACCTTCCTTGATATTGTCGTCGAAGAAGCTT	Bradyrhizobium oligotrophicum S58
D153	NifD	AKLNVLHCYRSMNYISRHMEEKFGIPWCEYNFFGPSKIAESLRKIASFFDDKIKEGAERVIAKYQPLMDAVIAKRPRREGKT	GGCCAAGCTCAACGTCCTGCACTGCTACCGCTCGATGAACTACATCTCCCGTCACATGGAGGAGAAGTTCGGCATTCCGTGGTGCGAATACAACTTCTTCGGCCCCTCCAAGATCGCCGAATCGCTGCGCAAGATTGCAAGCTTCTTCGACGACAAGATCAAGGAAGGTGCCGAGCGCGTCATCGCCAAGTATCAGCCGCTGATGGATGCGGTGATCGCCAAGTAACGGCCTCGGCGGGAAGGCAAGACCG	Bradyrhizobium sp. S23321
D155	NifD	YEFERFVEKLQPDLVGSGIKEKYVFQKMSVPFRQMHSWDYSGQYHGYDGFAIFARDMDMPVNPIWKRTKAPWKEQPTDKLQ	GCTATGAGTTCGAGCGCTTCGTCGAAAAACTCCAGCCTGATCTTGTCGGCTCAGGCATCAAGGAAAAGTACGTTTTCCAAAAGATGAGTGTGCCGTTCCGGCAGATGCATTCGTGGGACTATTCGGGTCAATATCACGGTTATGACGGCTTTGCGATCTTCGCGCGCGACATGGACATGCCCGTCAACTAGCCAATTTGGAAAAGAACGAAAGCTCCTTGGAAGGAACAGCCGACCGACAAGCTCCAGC	Bradyrhizobium japonicum J5
D158	NifD	DSWVKSTSKSVPGVMTIRGCAYAGSKGVVWGPIKDMIHISHGPVGCGQYSWAARRNYYIGTTGID	GTGTCTATGCCGGTGGTGCCGATGTAATAGTTACGCCGGGCCGCCCAGGAGTACTGACCGCAGCCGACCGGGCCGTGGCTGATGTGGATCATGTCCTTGATCGGACCCCACACCACGCCCTTCGAGCCAGCATAGGCGCAGCCGCGGATCGTCATCACGCCTGGAACTGACTTGCTGGTCGATTTTACCCAGCTGTCGGCATTATGTCTCTTACACAGATCTGCAGATGCCGCCGATCACACTAGAGAGAT	Bradyrhizobium sp. ORS278
D161	NifD	IDTFVTMQFTSGFQEKDIVFGGDKKLAKIIDEIQDLFPLNHGITIQSECPIGLIGDDIEAVSKSKSKEYDGKTIVPVRCEGFR	CCGCGGAAACCTTCGCACCGCACCGGCACGATGGTCTTGCCGTCATATTCCTTCGACTTCGACTTCGACACGGCCTCGATGTCGTCGCCGATCAGGCCGATCGGGCATTCCGACTGGATGGTGATGCCGTGATTGAGCGGGAACAGATCCTGGATCTCATCGATGATCTTGGCGAGCTTCTTGTCGCCGCCGAACACGATGTCCTTTTCCTGGAAGCCGGAGGTGAACTGCATGGTCACGAAGGTGTCGAT	Bradyrhizobium sp. ztm3
D162	NifD	SWAARRNYYIGTTGIDTFVTMQFTSDFQEKDIVFGGDKKLAKIIDEIQDLFPLNHGITIQSEVPIGLIVDDFRAVSQLQSQE	TTCCTGGGCGGCGCGACGCAACTACTACATCGGCACGACCGGCATCGACACCTTCGTGACCATGCAGTTCACCTCCGACTTCCAGGAAAAGGACATCGTGTTCGGCGGCGACAAGAAGCTCGCCAAGATCATCGATGAGATCCAGGATCTGTTCCCGCTCAATCACGGCATCACCATCCAGTCGGAAGTCCCGATCGGCCTGATCGTCGACGACTTCAGGGCCGTGTCGCAGCTGCAGTCGCAGGAATCTT	Bradyrhizobium sp. S23321
D164	NifD	CPIGLIGDDIEAVSKVKSKEYDGKTIVPVRCEGFRGVSQSLGHHIANDSIRDWVFDKIAPDAAPRVEPTPYDVAIIGAYNTGG	TGCCCGATCGGCCTGATCGGCGACGACATCGAGGCCGTCTCCAAGGTCAAATCGAAGGAATACGACGGCAAGACCATCGTGCCCGTGCGCTGCGAAGGCTTCCGCGGCGTGTCGCAGTCGCTCGGCCACCACATCGCCAACGACTCGATCCGGGATTGGGTGTTCGACAAGATCGCGCCGGACGCAGCTCCGAGGGTCGAACCGACGCCCTATGACGTCGCCATCATCGGCGCTTACAACACAGGCGGCGG	Bradyrhizobium oligotrophicum S58
D165	NifD	LRPRHVIGAEDLGMEVVGTGYEFGHNDDYQRTAQHYVKDGTLIYDDVTGYEFERFVEKIQPDLVGSGIKEKYVFQKMGVPFR	TGCCGGAACGGCACGCCCATCTTCTGGAAGACGTACTTTTCCTTGATGCCGGAGCCGACGAGGTCCGGCTGGATCTTCTCGACAAAGCGCTCGAACTCGTAACCGGTGACGTCGTCGTAGATCAGCGTGCCGTCCTTGACGTAGTGCTGTGCAGTGCGCTGATAGTCGTCGTTGTGGCCAAACTCATAGCCGGTTCCGACAACCTCCATGCCAAGATCCTCTTAGGCGCCGATCACATGGCGGGGACGCAA	Bradyrhizobium sp. S23321
D166	NifD	SGDGSLAELEATPKAKLNVLHCYRSMNYISRHMEEKFGIPWCEYNFFGPSKIAESLRKIASFFDDKIQEGAERVIAKYQPLIE	GGTCCGGCGACGGCAGCCTCGCCGAGCTCGAAGCCACCCCCAAGGCCAAGCTCAACGTCCTGCACTGCTACCGCTCGATGAACTACATCTCCCGCCACATGGAGGAGAAGTTCGGCATTCCGTGGTGCGAATACAACTTCTTCGGCCCCTCCAAGATCGCCGAATCGCTGCGCAAGATTGCAAGCTTCTTCGACGACAAGATCCAGGAAGGTGCCGAGCGCGTCATCGCCAAGTATCAGCCGCTGATCGAG	Bradyrhizobium sp. S23321
D168	NifD	HMEEKHQIPWMEYNFFGQTKIAESLRKIADQFDDTIRANAEAVIAKYEGQMAAIIAKYRPRLEGRKVLLYMGGLRPRPVIGA	CCATATGGAGGAGAAACATCAGATCCCATGGATGGAATATAACTTCTTCGGCCAGACCAAAATCGCCGAATCGCTGCGCAAGATCGCCGATCAATTTGATGACACCATTCGCGCCAATGCGGAAGCGGTGATCGCCAAATATGAGGGGCAGATGGCGGCCATCATCGCCAAATATCGCCCGCGGCTGGAGGGGCGCAAAGTGCTGCTGTACATGGGGGGGCTGCGACCGCGCCCCGTCATCGGCGCCT	Klebsiella pneumoniae KP5-1
D170	NifD	GDYEDLGMDILAAGYAHNEDYCRTLPDLKEGTLLFDDASSYELEAFVKALNPDLLGSGIKEKYIFQKMGVPFRQMHSD	AGTCTCAGGAGTGCATCTGGCGGAACGGCACCCCCATTTTCTGGAAGATATATTTCTCTTTGATCCCGGAGCCGAGGAGGTCAGGGTTCAGCGCTTTGACGAAGGCCTCCAGCTCATAGCTGCTGGCATCGTCAAACAGCAGGGTGCCCTCTTTCAGGTCCGGCAGGGTGCGGCAGTAATCCTCGTTATGGGCATACTACTAGCCGGCGGCGAGTATGTCCATGCCTAGATCCTCATAGTCGCCGTTGGCG	Klebsiella variicola GJ3
D173	NifD	IEEVLAAYPDKTKKKRQKHLNTAKAADAPETPEPADAPHGGLTECDVKSNLKSIPGVMTIRGCAYAGSKGVVWGPVKDMIHI	TCATCGAGGAGGTGCTGGCGGCGTATCCCGACAAGACCAAGAAGAAACGCCAGAAGCACCTCAATACCGCCAAGGCGGCAGATGCGCCGGAGACGCCGGAGCCGGCGGATGCGCCGCACGGCGGCCTGACCGAGTGCGACGTCAAGTCGAACCTGAAGTCGATCCCCGGCGTCATGACCATCCGCGGCTGCGCCTACGCCGGCTCCAAGGGCGTGGTGTGGGGGCCGGTCAAGGACATGATCCACATCAG	Rhodospirillum centenum SW
D177	NifD	YEDLGMEVVGTGYEFGHNDDYQRTAQHYVKDGTLIYDDVTGYEFEKFVEKVQPDLVGSGIKEKYVFQKMGVPFRQMHSWDYS	CCTATGAAGACCTCGGCATGGAGGTGGTCGGCACCGGCTACGAGTTCGGCCACAACGACGACTATCAGCGGACCGCCCAGCATTACGTCAAGGACGGCACACTGATCTATGACGACGTGACCGGTTACGAGTTCGAGAAATTCGTCGAGAAAGTGCAGCCGGATCTCGTCGGCTCCGGCATCAAGGAGAAATACGTGTTCCAGAAGATGGGCGTGCCGTTCCGGCAGATGCACTCCTGGGACTACTCCGG	Rhizobium sp. N741
D178	NifD	HNDDYQRTAQHYVKDGTLIYDDVTGYEFEKFVEKVQPDLVGSGIKEKYVFQKMGVPFRQMHSWDYSGPYHGYDGFAIFARDMD	TGTCCATGTCGCGCGCGAAGATCGCGAAACCGTCGTAGCCGTGGTATGGGCCGGAGTAGTCCCAGGAGTGCATCTGCCGGAACGGCACGCCCATCTTCTGGAACACGTATTTCTCCTTGATGCCGGAGCCGACGAGATCCGGCTGCACTTTCTCGACGAATTTCTCGAACTCGTAACCGGTCACGTCGTCATAGATCAGTGTGCCGTCCTTGACGTAATGCTGGGCGGTCCGCTGATAGTCGTCGTTGTGG	Rhizobium sp. N741
D179	NifD	HYVKDGTLIYDDVTGYEFEKFVEKVQPDLVGSGIKEKYVFQKMGVPFRQMHSWDYSGPYHGYDGFAFFARDMDMAINSPIW	GCATTACGTCAAGGACGGCACACTGATCTATGACGACGTGACCGGTTACGAGTTCGAGAAATTCGTCGAGAAAGTGCAGCCGGATCTCGTCGGCTCCGGCATCAAGGAGAAATACGTGTTCCAGAAGATGGGCGTGCCGTTCCGGCAGATGCACTCCTGGGACTACTCCGGCCCATACCACGGCTACGACGGCTTCGCGTTCTTCGCTCGCGACATGGACATGGCGATCAATTCGCCGATCTGGAAGAAGA	Bradyrhizobium oligotrophicum S58
D184	NifD	MSLATTQSVAEIKARNKQLIDEVLKVYPEKTAK	GCTTGGCGGTCTTCTCCGGATAGACCTTCAAGACCTCATCGATCAGCTGCTTGTTGCGCGCCTTGATCTCGGCGACGCTCTGGGTGGTTGCTAGGCTCATACGAATATCCCTCGATCTTTCCTCTGTAATGAAGGGCCTGCGCTTTCTCCGAAGCGCCGGACGTGGTGTTGACCGTCTCAGGCCGGCATGGCACCGAGTTCTGCGGCGGGGTTTCCCGCGGCCGGACCGTCGGCCCGCCTTCTTTCGTCCG	Bradyrhizobium sp. S23321
D186	NifD	EKDIVFGGDKKLAKIIDEIQELFPLNHGITIQSECPIGLIGDDIEAVSKVKSKEYEGKTIVPVRCEGFRGVSQSLGHHI	GAGAAGGACATCGTGTTCGGTGGCGACAAGAAGCTCGCCAAGATCATCGACGAGATCCAGGAGCTGTTCCCGCTCAACCACGGCATCACCATCCAGTCGGAATGCCCGATCGGCCTGATCGGCGACGACATCGAGGCGGTCTCGAAGGTTAAGTCGAAGGAGTATGAAGGCAAGACCATAGTGCCGGTGCGCTGCGAGGGCTTCCGTGGCGTCTCGCAGTCGCTCGGTCACCACATCGC	Azoarcus sp. KH32C
D188	NifD	YQPLMDAVIAKYRPRLEGKTVMLFVGGLRPRHVIGAYEDLGM	GTATCAGCCGCTGATGGACGCGGTGATCGCCAAGTACCGGCCGCGGCTGGAAGGCAAGACCGTGATGCTGTTCGTCGGCGGCTTGCGTCCTCGCCACGTGATCGGCGCCTATGAGGACCTCGGCATGGA	Bradyrhizobium sp. S23321
D189	NifD	YQPLMDAVIAKYRPRLEGKTVMLFVGGLRPRHVIGAYEDLGM	TCCATGCCGAGGTCCTCATAGGCGCCGATCACGTGGCGAGGACGCAAGCCGCCGACGAACAGCATCACGGTCTTGCCTTCCAGCCGCGGCCGGTACTTGGCGATCACCGCGTCCATCAGCGGCTGATAC	Bradyrhizobium sp. S23321
D190	NifD	MSVIEKQSVAEIKARNKELIAEVLKVYPEKTAKRRAKHLNVHENGKSDCGVKSNIK	GACTTGATGTTCGACTTGACGCCGCAGTCCGACTTTCCGTTCTCATGCACGTTGAGATGCTTGGCGCGGCGCTTGGCGGTCTTTTCCGGATAGACCTTCAGGACCTCGGCGATCAGTTCCTTGTTGCGTGCCTTGATCTCGGCAACGCTCTGCTTCTCGATGACGCTCATCTGGCTTTCCTCGATGATCGGTTGCGGAGGTGATCCGGCCCTTGAAGATGAAGGGCCGGATCACCGGTGGCAGTTTCGCCG	Bradyrhizobium oligotrophicum S58
D191	NifD	MSVIEKQSVAEIKARNKELIAEVLKVYPEKTAKR	GCACGGCATCATGAAGGCCGTCGATGAGACCCAGATCGGAAAGACTGCCGCCGATCTCGCCGCAACGGCGTAACTGCCACCGGTGATCCGGCCCTTCATCTTCAAGGGCCGGATCACCTCCGCAACCGATCATCGAGGAAAGCCAGATGAGCGTCATCGAGAAGCAGAGCGTTGCCGAGATCAAGGCACGCAACAAGGAACTGATCGCCGAGGTCCTGAAGGTCTATCCGGAAAAGACCGCCAAGCGCCG	Bradyrhizobium oligotrophicum S58
D192	NifD	IFDKISPEAKPTFEPTPYDVAIIGDYNIGGDAWSSRILLEEMGLRVIAQ	CTGCGCAATCACGCGCAGGCCCATCTCCTCGAGCAGGATGCGGGAGGACCAGGCGTCGCCGCCGATATTGTAGTCGCCGATAATCGCGACGTCGTAAGGCGTCGGTTCGAATGTCGGCTTGGCCTCCGGAGAGATCTTGTCGAAGAT	Bradyrhizobium sp. S23321
D193	NifD	IFDKISPEAKPTFEPTPYDVAIIGDYNIGGDAWSSRILLEEMGLRVIAQ	ATCTTCGACAAGATCTCTCCGGAGGCCAAGCCGACATTCGAACCGACGCCTTACGACGTCGCGATTATCGGCGACTACAATATCGGCGGCGACGCCTGGTCCTCCCGCATCCTGCTCGAGGAGATGGGCCTGCGCGTGATTGCGCAG	Bradyrhizobium sp. S23321
D194	NifD	IKEGAERVIAKYQQLMDAVIARYRPRLEGKTVMLFVGGLRPRHVIGAYEDLGMEVVGTGYEFGHNDDYQRTAQHYVKDGTLIY	AGATCAAGGAAGGCGCCGAGCGCGTCATCGCCAAGTACCAGCAGCTGATGGATGCGGTGATCGCACGATACCGGCCGCGCCTCGAAGGCAAGACGGTGATGCTGTTCGTCGGGGGACTTCGGCCGCGCCACGTGATCGGCGCCTATGAAGATCTCGGCATGGAAGTGGTCGGCACCGGCTATGAGTTCGGCCACAACGACGACTATCAGCGCACCGCCCAGCACTACGTCAAGGATGGCACGCTGATCTAT	Rhizobium etli CFN
D197	NifD	EKDIVFGGDKKLAKIIDEIQELFPLNHGITIQSECPIGLIGDDIEAVSKVKSKEYEGKTIVPVRCEGFRGVSQSLGHHI	GCGATGTGGTGACCGAGCGACTGCGAGACGCCACGGAAGCCCTCGCAGCGCACCGGCACTATGGTCTTGCCTTCATACTCCTTCGACTTAACCTTCGAGACCGCCTCGATGTCGTCGCCGATCAGGCCGATCGGGCATTCCGACTGGATGGTGATGCCGTGGTTGAGCGGGAACAGCTCCTGGATCTCGTCGATGATCTTGGCGAGCTTCTTGTCGCCACCGAACACGATGTCCTTCTC	Azoarcus sp. KH32C
D198	NifD	RKIAGFFDDKIKEGAERVIAKYQPLMDAVIARYRPRLEGKTVMLFVGGLRPRHVIGAYEDLGMEVVGTGYEFGHNDDYQRTAQ	GCGCAAGATCGCCGGCTTCTTTGACGACAAGATCAAGGAAGGCGCCGAGCGCGTTATCGCCAAGTATCAGCCGCTGATGGATGCGGTGATCGCAAGATACCGGCCGCGTCTCGAAGGCAAGACCGTGATGCTATTCGTCGGAGGGCTTCGGCCGCGACACGTGATCGGCGCTTATGAGGACCTCGGCATGGAAGTGGTCGGCACCGGCTATGAATTCGGCCACAACGACGACTATCAGCGCACCGCCCAG	Bradyrhizobium sp. S23321
D199	NifD	GSFLDDKLKEGAERGIAKYQPLMDAVIARYRPRLEGKTVMLFVGGLRPRHVIGAYEDLGMEVVGTGYEFGHNDDYQRTAQHY	ACGTAATGCTGGGCGGTGCGCTGATAGTCGTCGTTGTGGCCGAATTCATAGCCGGTGCCGACCACTTCCATGCCGAGGTCCTCATAAGCGCCGATCACGTGTCGCGGCCGAAGCCCTCCGACGAATAGCATCACGGTCTTGCCTTCGAGACGCGGCCGGTATCTTGCGATCACCGCATCCATCAGCGGCTGATACTTGGCGATACCGCGCTCGGCGCCTTCCTTGAGCTTGTCGTCAAGGAAGCTGCCGA	Bradyrhizobium sp. S23321
D201	NifD	KMGVPFRQMHSWDYSGPYHGYDGFAIFARDMDMAINSPVWKMAKAPWKQAPKPLLQAAE	CTATTTTCCTGTGTCGATCAGGGAGCGCTGGCTCTCCGCCGAAGGAGAGCCAGGCCGTGGGTGGTGGTGTTACTCGGCAGCCTGCAGCAAGGGCTTCGGCGCCTGCTTCCAGGGTGCCTTGGCCATCTTCCAGACCGGCGAGTTGATGGCCATGTCCATGTCGCGGGCGAAGATCGCGAACCCGTCATAGCCATGATAGGGACCCGAATAGTCCCAGGAATGCATCTGGCGGAACGGCACGCCCATCTT	Bradyrhizobium oligotrophicum S58
D202	NifD	AYEDLGMEVVGAGYEFGHNDDYQRTAQHYVKDGTLIYDDVTGYEFEKFVEKVQPDLVGSGIKEKYVFQKMGVPFRQMHSWDYS	GCGCCTACGAGGATCTCGGCATGGAAGTCGTCGGCGCCGGCTACGAGTTCGGCCACAACGACGACTATCAGCGCACTGCCCAGCATTACGTCAAGGACGGCACGCTGATCTATGACGACGTGACCGGCTACGAGTTCGAGAAGTTCGTCGAGAAGGTGCAGCCGGACCTGGTCGGATCTGGCATCAAGGAAAAGTACGTGTTCCAGAAGATGGGCGTGCCGTTCCGCCAGATGCATTCCTGGGACTATTCG	Bradyrhizobium oligotrophicum S58
D203	NifD	LRVIAQWSGDGSLAELEATPKAKLNVLHCYRSMNYISRHMEEK	CTTCTCCTCCATGTGACGGGAAATGTAGTTCATCGAGCGGTAGCAGTGCAGGACGTTGAGCTTGGCCTTGGGGGTGGCTTCGAGCTCGGCGAGGCTGCCGTCGCCGGACCACTGTGCGATCACGCGCAGGC	Azoarcus sp. KH32C
D204	NifD	LRVIAQWSGDGSLAELEATPKAKLNVLHCYRSMNYISRHMEEK	GCCTGCGCGTGATCGCACAGTGGTCCGGCGACGGCAGCCTCGCCGAGCTCGAAGCCACCCCCAAGGCCAAGCTCAACGTCCTGCACTGCTACCGCTCGATGAACTACATTTCCCGTCACATGGAGGAGAAG	Azoarcus sp. KH32C
D205	NifD	VMLFVGGLRPRHVIGAYEDLGMEVVGTGYEFGHNDDYQRTAQHYVKDGTLIYDDVTGYEFEKFVEKVQPDLVGSGIKAKYVFQ	CCGTGATGCTGTTCGTCGGCGGCCTGCGTCCGCGCCACGTGATCGGCGCCTACGAGGATCTTGGCATGGAAGTCGTCGGCACCGGCTACGAGTTCGGCCACAACGACGACTATCAGCGCACCGCCCAGCACTACGTCAAGGACGGCACGCTGATCTATGACGACGTGACCGGCTACGAGTTCGAGAAGTTCGTCGAGAAGGTCCAGCCGGATCTGGTCGGCTCGGGCATCAAGGCAAAGTACGTATTCCAG	Bradyrhizobium oligotrophicum S58
D208	NifD	EATPKAKLNVLHCYRSMNYISRHMEEKFGIPWCEYNFFGPAKIAESLRKIASFFDDKIKEGAERVIAKYQPLMDAVIAKY	GTACTTGGCGATCACCGCATCCATCAGCGGCTGATACTTGGCGATGACGCGCTCGGCACCTTCCTTGATCTTGTCGTCGAAGAAGCTTGCGATCTTGCGCAGCGATTCGGCGATCTTGGCGGGGCCGAAGAAGTTGTATTCGCACCACGGAATGCCGAACTTCTCCTCCATGTGACGGGAGATGTAGTTCATAGAGCGGTAGCAGTGCAGGACGTTGAGCTTGGCCTTGGGCGTGGCTTCGAGCTCGGGTG	Bradyrhizobium sp. S23321
D209	NifD	IKARNKQLIDEVLKVYPEKTAKRRAKHLNVHEAGKSDCGVKSNLKSIPGVMTIRGCAYAGSNGVVCEQIISLIHISEGTV	AGATCAAGGCGCGCAACAAGCAGCTGATCGATGAGGTCTTGAAGGTCTATCCGGAGAAGACCGCTAAGCGTCGCGCCAAGCATCTCAACGTGCACGAGGCCGGCAAGTCGGATTGCGGCGTCAAGTCCAATCTGAAATCCATCCCGGGCGTGATGACGATCCGCGGCTGCGCCTATGCCGGTTCCAATGGAGTGGTGTGTGAGCAGATCATATCCCTGATACACATCAGCGAAGGCACAGTAGTCTTCGG	Bradyrhizobium sp. S23321
D211	NifD	IHISHGPVGCGQYSWAARRNYYIGTTGIDTFVTMQFTSDFQEKDIVFGGDKKLAKIIDEIQELFPLNHGITIQSECPIGLIGD	GATCCATATCAGCCACGGCCCGGTCGGCTGCGGCCAGTATTCCTGGGCCGCGCGGCGCAACTACTATATCGGCACGACGGGCATCGACACCTTCGTGACCATGCAGTTCACCTCCGACTTCCAGGAGAAGGACATCGTGTTCGGCGGCGACAAGAAGCTCGCCAAGATCATCGACGAAATCCAGGAGTTGTTCCCCCTCAACCACGGCATCACCATCCAGTCGGAATGCCCGATCGGCCTGATCGGCGACG	Bradyrhizobium sp. ztm3
D212	NifD	VHISHGPVGCGQYSWGSRRNYYVGTTGIDSFVTLQFTSDFQEKDIVFGGDKKLDKILDEIQELFPLNNGITIQSECPVGLIGD	GGTTCATATCAGCCATGGCCCGGTTGGCTGCGGCCAATATTCATGGGGCTCGCGGCGCAACTATTACGTTGGCACCACGGGCATCGATAGCTTCGTGACTCTGCAGTTCACCTCCGACTTCCAGGAAAAGGATATCGTATTTGGCGGCGACAAGAAACTGGACAAAATCCTTGATGAAATCCAAGAGCTGTTTCCACTCAACAACGGCATTACGATACAATCAGAGTGCCCGGTAGGGTTGATCGGTGACG	Bradyrhizobium diazoefficiens USDA 122
D213	NifD	GCGQYSWGSRRNYYVGTTGIDSFVTLQFTSDFQEKDIVFGGDKKLDKILDEIQELFPLNNGITIQSECPVGLIGDDIEAVSR	GCCCTTGACACCGCCTCGATATCGTCACCGATCAACCCTACCGGGCACTCTGATTGTATCGTAATGCCGTTGTTGAGTGGAAACAGCTCTTGGATTTCATCAAGGATTTTGTCCAGTTTCTTGTCGCCGCCAAATACGATATCCTTTTCCTGGAAGTCGGAGGTGAACTGCAGAGTCACGAAGCTATCGATGCCCGTGGTGCCAACGTAATAGTTGCGCCGCGAGCCCCATGAATATTGGCCGCAGCCAA	Bradyrhizobium diazoefficiens USDA 122
D214	NifD	NDAYQRTAQHYVKDGTLIYDDVTGYEFEKFVEKVQPDLVGSGIKEKYGFQKMGVPFRQMHSWDYSGPYHGYDGFAIFARDMDM	GACATGTCCATGTCGCGGGCGAAGATCGCGAACCCGTCATAGCCATGATAGGGACCCGAATAGTCCCAGGAGTGCATCTGGCGGAACGGCACGCCCATCTTCTGGAATCCGTACTTTTCCTTGATGCCCGAGCCGACCAGATCCGGCTGGACCTTCTCGACGAACTTCTCGAACTCGTAGCCGGTCACGTCGTCATAGATCAGCGTGCCGTCCTTGACGTAGTGCTGGGCGGTGCGCTGATAGGCGTCGTT	Bradyrhizobium sp. ORS278
D215	NifD	PVGCGQYSWAARRNYYIGTTGIDTFVTMQFTSDFQEKDIVFGGDKKLAKIMDEIQELFPLNRGITVQSECPIGLIGDDIEA	GGCCTCGATGTCGTCGCCGATCAGGCCGATCGGGCATTCCGACTGCACCGTGATGCCCCGGTTGAGCGGGAACAGCTCCTGGATCTCGTCCATGATCTTGGCAAGCTTCTTGTCGCCGCCGAAGACGATGTCCTTCTCCTGGAAATCGGAGGTGAACTGCATGGTCACAAAAGTGTCGATGCCGGTCGTGCCGATGTAGTAGTTGCGCCGCGCCGCCCAGGAATATTGGCCGCATCCGACCGGGC	Bradyrhizobium sp. psr4
D216	NifD	PVGCGQYSWAARRNYYIGTTGIDTFVTMQFTSDFQEKDIVFGGDKKLAKIMDEIQELFPLNRGITVQSECPIGLIGDDIRA	GCCCGGTCGGATGCGGCCAATATTCCTGGGCGGCGCGGCGCAACTACTACATCGGCACGACCGGCATCGACACTTTTGTGACCATGCAGTTCACCTCCGATTTCCAGGAGAAGGACATCGTCTTCGGCGGCGACAAGAAGCTTGCCAAGATCATGGACGAGATCCAGGAGCTGTTCCCGCTCAACCGGGGCATCACGGTGCAGTCGGAATGCCCGATCGGCCTGATCGGCGACGACATCCGGGCC	Bradyrhizobium sp. psr4
D227	NifD	DYDRTLPDLKEGTLLFDDASSYELEAFVKALKPDLIGSGIKEKYIFQKMGVPFRQMHSWDYSGPYHGYDGFAIFARDMDMTLN	GATTACGACCGCACCCTGCCGGACCTGAAAGAGGGCACCCTGCTGTTTGACGATGCCAGCAGCTATGAGCTGGAGGCCTTCGTCAAAGCGCTGAAACCTGACCTCATCGGCTCCGGGATCAAAGAGAAATATATCTTCCAGAAAATGGGGGTGCCGTTCCGCCAGATGCACTCCTGGGACTATTCCGGCCCCTATCACGGCTATGACGGCTTCGCCATCTTTGCCCGCGATATGGATATGACCCTGAACAA	Klebsiella variicola GJ3
D228	NifD	HISHGPVGCGQYSWAARRNYYIGTTGIDTFVTMQFTADFQEKDIVFGGDKKPAKIIDEIQELFPLNHGITIQSECPIGLIGDD	TGTCGTCGCCGATCAGGCCGATCGGGCATTCCGACTGGATGGTGATGCCGTGGTTGAGCGGGAACAGCTCCTGGATCTCGTCGATGATCTTGGCGGGCTTCTTGTCGCCACCGAACACGATGTCCTTCTCCTGGAAATCGGCGGTGAACTGCATGGTCACGAAGGTGTCGATGCCGGTCGTGCCGATGTAGTAGTTGCGGCGCGCCGCCCAGGAATACTGACCGCAGCCGACCGGGCCGTGGCTGATATGG	Bradyrhizobium sp. S23321
D230	NifD	FVTMQFTSDFQEKDIVFGGDKKLAKIIDEIQELFPLNHGITIQSECPIGLTGDDIEAV	GTTCGTGACCATGCAGTTCACCTCCGACTTCCAGGAGAAGGACATCGTGTTCGGCGGCGACAAGAAGCTCGCCAAGATCATCGACGAGATCCAGGAGTTGTTTCCCCTCAACCACGGCATCACCATCCAGTCGGAATGCCCGATCGGCCTGACTGGCGACGACATAGAGGCGGTGTCGAAGGGTAAATCCAAGGGGTATGAGTGAAAGTACACGTGCCCGCGGGGCTGGCCATGATCGCGTGGGGGTTAG	Bradyrhizobium sp. ztm3
D231	NifD	QHYVKDGTLIYDDVTGYEFEKFVEKIQPDLVGSGIKEKYVFQKMGVPFRQMHSWDYSGPYHGYDGFAIFARDMDMAINSPIWK	CTTCCAGATCGGCGAGTTGATCGCCATGTCCATGTCGCGCGCGAAGATCGCGAATCCGTCATAGCCGTGGTAGGGACCGGAATAATCCCAGGAGTGCATCTGCCGGAACGGCACACCCATCTTCTGGAAGACGTACTTCTCCTTGATGCCCGAGCCGACCAGATCGGGCTGGATCTTCTCGACGAATTTTTCGAACTCGTATCCGGTCACGTCGTCATAGATCAGCGTGCCGTCCTTGACGTAATGCTGGG	Bradyrhizobium sp. ORS278
D232	NifD	VLHCYRSMNYISRHMEEKYGIPWCEYNFFGPSKIAESLRKIASYFDDKIKEGAERVIAKYQPLMDAVIAKYRPRLEGKTVMLY	CGTACAGCATCACCGTCTTGCCTTCGAGACGCGGGCGGTACTTGGCGATCACCGCATCCATCAGAGGCTGGTACTTGGCGATAACGCGCTCAGCGCCTTCCTTGATCTTGTCGTCGAAATAGCTGGCGATCTTGCGCAGCGACTCGGCAATCTTGCTCGGCCCGAAGAAGTTATATTCGCACCACGGAATACCGTACTTCTCTTCCATGTGACGCGAGATGTAGTTCATCGAGCGATAGCAGTGCAGCACA	Bradyrhizobium sp. ORS278
D233	NifD	VGGLRPRHVIGAYEDLGMEVVGTGYEFGHNDDYQRTAQHYVKDGTLIYDDVSGYEFEKFVEKIQPDLVGSGIKVTYVFQK	CGTCGGCGGACTTCGGCCGCGCCACGTGATCGGCGCCTATGAAGATCTTGGCATGGAGGTGGTCGGCACCGGCTACGAGTTCGGCCACAACGACGACTACCAACGGACCGCCCAGCATTACGTCAAGGACGGCACGCTGATCTATGACGACGTGAGCGGATACGAGTTCGAAAAATTCGTCGAGAAGATCCAGCCCGATCTGGTCGGCTCGGGCATCAAGGTGACGTACGTCTTCCAGAAGATGGGTGGG	Bradyrhizobium sp. ORS278
D234	NifD	HNDDYQRTAQHYVKDGTLIYDDVTGYEFERFVEKIQPDLVGSGIKEKYVFQKMGVPFRQMHSWDYSGPYHGYDGFAIFARDMD	TGTCCATGTCGCGCGCGAAGATCGCGAACCCGTCATAGCCGTGATACGGACCCGAATAGTCCCAGGAATGCATCTGACGGAACGGCACGCCCATTTTCTGGAAGACGTACTTCTCCTTGATGCCGGAGCCGACGAGGTCGGGCTGGATCTTCTCGACGAAGCGCTCGAACTCGTAGCCGGTGACGTCGTCATAGATCAGCGTACCGTCCTTGACGTAATGCTGGGCGGTGCGCTGGTAGTCGTCGTTGTGG	Bradyrhizobium sp. S23321
D235	NifD	DAVRDWIFDKISPEAKPTFEPTPYDVAIIGDYNIGGDAWSSRILLEEMGLRVIAQWSGDGSLAELEATPKAKLN	ACGACGCCGTGCGCGACTGGATCTTCGACAAGATCTCTCCGGAGGCCAAGCCGACATTCGAGCCGACGCCCTACGACGTCGCGATCATCGGCGACTACAATATCGGTGGCGATGCCTGGTCCTCCCGCATCCTGCTCGAGGAGATGGGCCTGCGCGTGATTGCGCAGTGGTCCGGCGACGGCAGCCTCGCCGAGCTCGAAGCCACGCCCAAGGCCAAGCTCAACGT	Bradyrhizobium sp. S23321
D236	NifD	DAVRDWIFDKISPEAKPTFEPTPYDVAIIGDYNIGGDAWSSRILLEEMGLRVIAQWSGDGSLAELEATPKAKLN	ACGTTGAGCTTGGCCTTGGGCGTGGCTTCGAGCTCGGCGAGGCTGCCGTCGCCGGACCACTGCGCAATCACGCGCAGGCCCATCTCCTCGAGCAGGATGCGGGAGGACCAGGCATCGCCACCGATATTGTAGTCGCCGATGATCGCGACGTCGTAGGGCGTCGGCTCGAATGTCGGCTTGGCCTCCGGAGAGATCTTGTCGAAGATCCAGTCGCGCACGGCGTCGG	Bradyrhizobium sp. S23321
D237	NifD	GSGHSSWAARRNYYIGTTGIDTFVTMQFTSDFQEKDIVFGGDKKLAKIMDEIQELFPLNNGITVQSECPIGLIGDDIEAVSK	ACCTTGGAGACCGCCTCGATGTCGTCGCCGATCAGGCCGATCGGGCATTCCGACTGCACGGTGATGCCGTTGTTGAGCGGGAACAGCTCCTGGATCTCGTCCATGATCTTGGCGAGCTTCTTGTCGCCGCCGAACACGATGTCCTTCTCCTGGAAGTCGGAGGTGAACTGCATCGTCACGAAGGTGTCGATGCCGGTCGTTCCGATGTAGTAGTTGCGGCGGGCTGCCCAGGAGGAGTGGCCGGAGCCGG	Bradyrhizobium sp. ORS278
D238	NifD	VLKVYPEKTAKRRAKHLNVHENGKSDCGVKSNIKSIPGVMTIRGCAYAGSKGVVWGPIKDMIHISHGPVGCGQYSWAARRNYY	GTCCTGAAGGTCTATCCGGAAAAGACCGCCAAGCGCCGCGCCAAGCATCTCAACGTGCATGAGAACGGAAAGTCGGACTGCGGCGTCAAGTCGAACATCAAGTCGATTCCGGGCGTCATGACCATTCGCGGTTGCGCCTACGCCGGCTCCAAGGGCGTGGTGTGGGGCCCGATCAAGGACATGATCCATATCAGCCACGGCCCGGTCGGCTGCGGCCAGTACTCCTGGGCAGCCCGCCGCAACTACTACAT	Bradyrhizobium oligotrophicum S58
D239	NifD	MSVIEKQSVAEIKARNKELIAEVLKVYPEKTAKRRAKHLNVHENGKSDCGVKSNIKSIPGVMTIRGCAYAGSKGVV	CACCACGCCCTTGGAGCCGGCGTAGGCGCAACCGCGGATGGTCATGACGCCCGGAATCGACTTGATGTTCGACTTGACGCCGCAGTCCGACTTGCCGTTCTCATGCACGTTGAGATGCTTGGCGCGGCGCTTGGCGGTCTTTTCCGGGTAGACCTTCAGGACCTCGGCGATCAGTTCCTTGTTGCGCGCCTTGATCTCGGCAACGCTTTGTTTCTCGATGACGCTCATCTGGCTTTCCTCGATGATCGGTT	Bradyrhizobium oligotrophicum S58
D240	NifD	MSVIEKQSVAEIKARNKELIAEVLKVYPDKT	TGCTCATGGAGCACGGCATCATGAAGGCCGTCGACGAGACCCAGATCGGAAAGACTGCCGCCGATCTCGCCGCAACGGCGTAACTGCCACCGGCGATCCGGCCCTTCATCTTCAAGGGCCGGATCACCTCCGCAACCGATCATCGAGGAAAGCCAGATGAGCGTCATCGAGAAACAAAGCGTTGCCGAGATCAAGGCGCGCAACAAGGAACTGATCGCCGAGGTCCTGAAGGTCTACCCGGACAAGACCG	Bradyrhizobium oligotrophicum S58
D241	NifD	MEEKHQIPWMEYNFFGPTKIAESLRKIADQFDDTIRANAEAVIAKYEGQMAAIIAKYRPRLEGRKVLLYMGGLRPRHVIGAYE	ATATGGAGGAGAAACATCAGATCCCGTGGATGGAATATAACTTCTTCGGCCCGACCAAAATCGCCGAATCGCTGCGCAAGATCGCCGATCAATTTGATGACACCATTCGCGCCAATGCGGAAGCGGTGATCGCCAAATATGAGGGGCAGATGGCGGCCATCATCGCCAAATATCGCCCGCGGCTGGAGGGGCGCAAAGTGCTGCTGTACATGGGGGGGCTGCGACCGCGCCACGTCATCGGCGCCTATGAG	Klebsiella pneumoniae KP5-1
D243	NifD	PYDVAIIGDYNIGGDAWSSRILLEEMGLRVIAQWSGDGSLAELEATPKAKLNVLHCYRSMNYIS	GGAGATGTAGTTCATCGAGCGGTAGCAGTGCAGGACGTTGAGCTTCGCCTTGGGTGTCGCTTCCAGCTCCGCGAGGCTGCCGTCACCCGACCATTGCGCGATCACGCGCAAGCCCATTTCCTCGAGCAGGATGCGCGAGGACCATGCGTCACCACCGATGTTGTAGTCGCCGATGATCGCGACGTCATAGGG	Bradyrhizobium sp. Soph313
D244	NifD	PYDVAIIGDYNIGGDAWSSRILLEEMGLRVIAQWSGDGSLAELEATPKAKLNVLHCYRSMNYIS	CCCTATGACGTCGCGATCATCGGCGACTACAACATCGGTGGTGACGCATGGTCCTCGCGCATCCTGCTCGAGGAAATGGGCTTGCGCGTGATCGCGCAATGGTCGGGTGACGGCAGCCTCGCGGAGCTGGAAGCGACACCCAAGGCGAAGCTCAACGTCCTGCACTGCTACCGCTCGATGAACTACATCTCC	Bradyrhizobium sp. Soph313
D246	NifD	IGAYEDLGMDVIGTGYEFGHNDDYQRTAQHYVKDSTLIYDDVNGYEFERFVEKLQPDLVGSGIKEKYVFQKMGVPFRQMHSWD	AGTCCCACGAATGCATCTGCCGGAACGGCACCCCCATCTTTTGGAAAACGTACTTTTCCTTGATGCCTGAGCCGACAAGATCAGGCTGGAGTTTTTCGACGAAGCGCTCGAACTCATAGCCATTGACGTCATCATAGATGAGGGTGCTGTCTTTCACGTAGTGCTGAGCTGTGCGCTGATAGTCGTCGTTGTGACCGAACTCGTAGCCAGTGCCAATGACGTCCATCCCGAGGTCCTCGTACGCGCCAAT	Bradyrhizobium diazoefficiens
D247	NifD	PWCEYNFFGPSKIADSLRRIAGYFDDKIKEGAERVIEKYQPLVDAVIAKYRPRLEGKTVMLYVGGLRPRHVIGAYEDLGVDVI	CCCTTGGTGCGAGTACAACTTCTTCGGACCTTCAAAGATCGCGGACTCACTGCGCAGGATTGCGGGTTATTTTGACGACAAGATCAAGGAAGGCGCCGAGCGAGTGATCGAGAAGTATCAGCCGCTGGTGGACGCCGTGATTGCAAAATATCGCCCGCGCCTCGAGGGCAAGACGGTGATGCTGTACGTCGGCGGCCTTCGTCCGCGTCATGTGATTGGCGCGTACGAGGACCTCGGGGTGGACGTCATTG	Bradyrhizobium japonicum J5
D248	NifD	EEKQQIPWMEYNFFGPTKIAESLRKIADQFDDTIRANAEAVIAKYEGQMAAIIAKYRPRLEGRKVLLYMGGLRPRHVIGAYED	ATCCTCATAGGCGCCGATGACGTGGCGCGGTCGCAGCCCCCCCATGTACAGCAGCACTTTGCGCCCCTCCAGCCGCGGGCGATATTTGGCGATGATGGCCGCCATCTGCCCCTCATATTTGGCGATCACCGCTTCCGCATTGGCGCGAATGGTGTCATCAAATTGATCGGCGATCTTGCGCAGCGATTCGGCGATTTTGGTCGGGCCGAAGAAGTTATATTCCATCCACGGGATCTGTTGTTTCTCCTCCA	Klebsiella pneumoniae KP5-1
D249	NifD	ISRHMEEKFGIPWCEYNFFGPSKIADSLRRIAGYFDDKIKEGAERVIEKYQPLVDAVIAKYRPRLEGKTVMLYVGGLRPRHVI	TATCTCACGCCACATGGAAGAGAAGTTCGGCATCCCTTGGTGCGAGTACAACTTCTTCGGACCTTCAAAGATCGCGGACTCACTGCGCAGGATTGCGGGTTATTTTGACGACAAGATCAAGGAAGGCGCCGAGCGAGTGATCGAGAAGTATCAGCCGCTGGTGGACGCCGTGATTGCAAAATATCGCCCGCGCCTCGAGGGCAAGACGGTGATGCTGTACGTCGGCGGCCTTCGTCCGCGTCATGTGATTG	Bradyrhizobium japonicum J5
D250	NifD	SKYRPRREGKTVMLYGGGLRPRHVIGAYEDLGMDVIGTGYEFGHNDDYQRTAQHYVKDSTLIYDDVNGYEFERFVEKLQPDLV	GACAAGATCAGGCTGGAGTTTTTCGACGAAGCGCTCGAACTCATAGCCATTGACGTCATCATAGATGAGGGTGCTGTCTTTCACGTAGTGCTGAGCTGTGCGCTGATAGTCGTCGTTGTGACCGAACTCGTAGCCAGTGCCAATGACGTCCATCCCGAGGTCCTCGTACGCGCCAATCACATGACGCGGACGAAGGCCGCCGCCGTACAGCATCACCGTCTTGCCCTCTCGCCGCGGGCGATATTTTGAAA	Bradyrhizobium diazoefficiens USDA 122
D251	NifD	MSSLRQIAFYGKGGIGKSTTSQNTLAALAEMGHKILIVGCDPKADSTRLILHAKAQDTILSLAAN	GATCATGAGAGAGCGCACGCCGGGCGATCAGCATCGGCTGAAGGAGAAGCAACATGTCTTCACTGAGACAAATCGCGTTTTACGGCAAGGGCGGTATCGGCAAGTCGACGACGTCGCAGAACACGCTGGCTGCGCTGGCGGAGATGGGCCACAAGATCCTGATCGTCGGCTGCGATCCCAAGGCGGACTCGACCCGCCTGATCCTGCACGCCAAGGCGCAGGACACCATCCTCAGCCTGGCAGCAAATGC	Bradyrhizobium sp. S23321
D301	NifD	NDAVRDWIFDKISPEAKPTFESSPYDVAIIGDYNIGGYAWSSRILLEEMGLRVIAQWSGAGRLAELEASPKAKLNCLYC	CCAACGACGCGGTGCGCGACTGGATTTTCGACAAGATCTCCCCCGAGGCCAAGCCGACGTTCGAGTCTTCGCCTTACGACGTCGCGATCATCGGCGACTACAATATCGGCGGCTATGCCTGGTCCTCCCGCATCCTGCTGGAGGAGATGGGCCTGCGCGTGATCGCACAGTGGTCCGGCGCCGGCAGACTCGCCGAGCTCGAAGCCAGCCCCAAGGCTAAGCTCAACTGCCTGTACTGCGACCCACTCACG	Bradyrhizobium sp. ztm3
D302	NifD	LHVTSEFVQKDSVFGGNKKMENICREITEVFPLSKGISIQSECPVGLIGDDIEAVGKKMTKELQLPVIPVRCEGFRGVSQSL	CCCAAGGACTGGCTGACGCCCCGGAAGCCTTCGCAGCGTACCGGAATGACCGGCAGCTGGAGCTCCTTGGTCATCTTCTTGCCTACGGCTTCGATATCGTCGCCGATCAGACCGACCGGACACTCGGATTGGATCGAGATGCCCTTCGACAACGGGAATACTTCCGTGATCTCCCGGCAGATGTTCTCCATCTTCTTGTTGCCGCCGAAGACGCTGTCCTTCTGTACGAACTCGCTGGTGACATGCAGCC	Paenibacillus durus DSM 1735
D303	NifD	DDIEAVSKSKSKEYDGKTIVPVRCEGFRGVSQSLGHHIANDAIRDWVFDKIPADAAPRFEPSPYDVAIIGDYNIGGDAWSSRI	GAATACGCGACGACCACGCGTCGCCACCGATGTTGTAGTCGCCGATGATCGCGACGTCGTATGGCGACGGCTCAAAGCGCGGCGCTGCATCGGCTGGAATCTTGTCGAACACCCAGTCGCGGATTGCGTCGTTCGCGATGTGGTGACCGAGCGACTGCGACACGCCGCGGAAGCCTTCGCAGCGAACCGGAACAATCGTCTTGCCGTCGTATTCCTTCGACTTGCTCTTGGAGACCGCTTCGATGTCGTC	Bradyrhizobium sp. ORS 285
D304	NifD	YEGKTIVPVRCEGFRGVSQSLGHHIANDSIRDWVFDKIAPDAPPKFESTPYDVAIIGDYNIGGDAWSSRILLEEMGLRVIAQW	ATACGAAGGCAAGACCATCGTTCCGGTCCGCTGCGAGGGCTTTCGCGGCGTGTCGCAGTCGCTTGGCCACCACATCGCCAACGACTCGATCCGTGACTGGGTGTTCGACAAGATTGCGCCGGATGCACCGCCGAAGTTCGAGTCCACGCCTTATGATGTCGCCATCATCGGCGACTACAACATCGGTGGCGATGCTTGGTCGTCCCGCATCCTGCTCGAAGAGATGGGCCTGCGTGTGATCGCCCAGTGGT	Immundisolibacter cernigliae TR3.2
D305	NifD	DQVATDAAPKFEYTHYDVASIGDYNIGGDAWASRILLEEMGLRVIAQWSGDGSLAELEATPKAKLNVLHCYRSMNYISRHMEE	CTCTTCCATGTGCCGCGAGATGTAGTTCATCGAACGGTAGCAATGGAGTACGTTGAGCTTGGCCTTGGGGGTCGCTTCCAACTCGGCGAGAGAGCCGTCGCCAGACCACTGGGCGATCACACGCAGGCCCATCTCTTCGAGCAGGATGCGGGACGCCCAAGCATCGCCACCGATGTTGTAGTCGCCGATGCTGGCGACATCATAATGCGTGTACTCGAACTTCGGCGCTGCATCCGTCGCCACCTGGTCGA	Azorhizobium caulinodans ORS 571 DNA
D306	NifD	AKQMVVNDPDTPPEIGANTRTIPGIITQRGCTYAGCRGVVMGPIYDLLQITHGPIGCGYYAWLTRRNLTRPTEGRPNFLQYAM	GCGCAAAGCAGATGGTCGTGAACGATCCCGATACGCCGCCGGAGATCGGCGCGAACACCCGCACGATTCCCGGCATCATCACCCAGCGCGGCTGCACGTATGCGGGTTGCCGCGGCGTCGTCATGGGGCCGATCTACGATCTGTTGCAGATCACGCACGGCCCGATCGGCTGCGGCTACTACGCGTGGCTCACACGCCGCAACCTCACGCGTCCGACGGAAGGCCGCCCGAATTTTCTCCAATACGCGATG	Opitutaceae bacterium TAV5
D307	NifD	GPLDVNVIGDYNIGGDAWASRLLLEEMGLRVIGNWSGDATLAEIERAPKAQLNLIHCYRSMNYICRHMEEKYGVAWMEYNFFG	GGCCCGCTCGATGTCAACGTGATCGGCGACTACAACATCGGCGGCGACGCCTGGGCCTCGCGGCTGCTGCTGGAGGAAATGGGGCTGCGCGTCATCGGCAACTGGTCCGGCGACGCGACGCTGGCCGAGATCGAGCGGGCGCCGAAGGCGCAGCTCAACCTCATTCATTGCTATCGGTCGATGAACTACATCTGCCGGCATATGGAGGAAAAATACGGCGTCGCCTGGATGGAGTACAACTTCTTCGGAC	Methylobacterium sp. 4-46
D308	NifD	RASVDSGRAQYKPRPQGKTVMLYVGGLGPRHVITAYEDLGMEIVGTGYEFGHNDDYQRTGHYVKKGTLIYDDVTGYELEK	CTTCTCCAACTCATAGCCGGTGACGTCGTCGTAGATCAGCGTGCCCTTCTTCACGTAGTGCCCGGTGCGCTGATAGTCGTCGTTGTGGCCGAACTCATAGCCGGTGCCGACGATCTCCATGCCGAGATCCTCATAGGCCGTGATCACATGGCGCGGGCCCAGGCCGCCGACATAGAGCATCACCGTCTTGCCCTGCGGACGCGGCTTGTATTGTGCGCGGCCGCTGTCTACGCTCGCCCGTTATATGGCAT	Mesorhizobium chacoense LMG 19008
D309	NifD	YEGMMSEMRKGDLVIDDISHHEMEKLIEIYKPDIIGSGIKDKFVVEKMGLPCKQLHSYDYGGPYAAFTGAANFYQEVDRMVNT	CTACGAGGGCATGATGAGCGAGATGCGCAAGGGCGACCTCGTGATCGACGACATCAGCCATCACGAGATGGAGAAGCTCATCGAGATCTACAAGCCCGACATCATCGGCTCCGGCATCAAGGACAAGTTCGTCGTCGAGAAGATGGGCCTGCCGTGCAAGCAGCTCCACAGCTACGACTACGGCGGCCCCTACGCGGCCTTCACCGGCGCGGCGAATTTCTACCAGGAAGTCGATCGCATGGTGAACACGA	Chlorobium luteolum DSM 273
D310	NifD	DISHHEMEKLIEIYKPDIIGSGIKDKFVVEKMGLPCKQLHSYDYGGPYAAFTGAANFYQEVDRMVNTKVWKYATPPWEKNP	AGCTGCGGGTTTTTCTCCCAGGGCGGCGTGGCGTATTTCCAGACCTTCGTGTTCACCATGCGATCGACTTCCTGGTAGAAATTCGCCGCGCCGGTGAAGGCCGCGTAGGGGCCGCCGTAGTCGTAGCTGTGGAGCTGCTTGCACGGCAGGCCCATCTTCTCGACGACGAACTTGTCCTTGATGCCGGAGCCGATGATGTCGGGCTTGTAGATCTCGATGAGCTTCTCCATCTCGTGGTGGCTGATGTCGT	Chlorobium luteolum DSM 273
D311	NifD	AAREEMLKIYPPKTRKKRAKQMVVNDPDTPPEIGANTRTIPGIITQRGCTYAGCRGVVMGPMHDVLHITHGPIGCSF	TAGTAGCCGCAGCCGATCGGGCCGTGCGTGATCTGCAACAGATCGTAGATCGGCCCCATGACGACGCCGCGGCAACCCGCATACGTGCAGCCGCGCTGGGTGATGATGCCGGGAATCGTGCGGGTGTTCGCGCCGATCTCCGGCGGCGTATCGGGATCGTTCACGACCATCTGCTTTGCGCGCTTCTTGCGCGTCTTCGGCGGATAAATCTTGAGCATTTCCTCGCGGGCGGCTTCGGCCGCGTCGGCGAG	Opitutaceae bacterium TAV5
D312	NifD	AAREEMLKIYPPKTRKKRAKQMVVNDPDTPPEIGANTRTIPGIITQRGCTHAGCRGVVMGPLYDLLQITHGPTG	CTCGCCGACGCGGCCGAAGCCGCCCGCGAGGAAATGCTCAAGATTTATCCGCCGAAGACGCGCAAGAAGCGCGCAAAGCAGATGGTCGTGAACGATCCCGATACGCCGCCGGAGATCGGCGCGAACACCCGCACGATTCCCGGCATCATCACCCAGCGCGGCTGCACGCATGCGGGGTGCCGCGGCGTCGTCATGGGGCCGCTCTACGATCTGTTGCAGATCACCCACGGCCCCACCGGCTGGGGCTCCTA	Opitutaceae bacterium TAV5
D313	NifD	GMMSEMRKGDLVIDDISHHEMEKLIEIYKPDIIGSGIKDKFVVEKMGLPCKQLHSYDYGGPYAAFTGAANFYQEVDRM	GGCATGATGAGCGAGATGCGCAAGGGCGACCTCGTGATCGACGACATCAGCCATCACGAGATGGAGAAGCTCATCGAGATCTACAAGCCCGACATCATCGGCTCCGGCATCAAGGACAAGTTCGTCGTCGAGAAGATGGGCCTGCCGTGCAAGCAGCTCCACAGCTACGACTACGGAGGCCCCTACGCGGCCTTCACCGGCGCGGCGAATTTCTACCAGGAAGTAGATCGCATGGGGACACCGTAGGT	Chlorobium tepidum TLS
D314	NifD	TLSGDVSYDQVKRAHTVQLNTVMCHRSINYIAEMMEVKYGIPWIKVNFIGAESTAKSLRKIAQYFESKKLSDRVEEVIAQEMA	CGGCCATCTCCTGCGCGATGACTTCCTCGACGCGGTCGCTGAGCTTCTTGCTCTCGAAATACTGCGCGATCTTGCGCAGCGACTTCGCCGTGGACTCGGCGCCGATGAAGTTCACCTTGATCCACGGGATGCCGTATTTCACCTCCATCATCTCGGCGATGTAGTTGATCGAGCGGTGGCACATCACGGTGTTCAGCTGCACGGTGTGCGCGCGCTTCACCTGGTCGTAGCTCACGTCGCCGGAGAGCGTG	Desulfovibrio vulgaris str. 'Miyazaki F'
D315	NifD	FKDYEGMMSEMRKGDLVIDDISHHEMEKLIEIYKPDIIGSGIKDKFVVEKMGLPCKQLHSYDYGGPYAAFTGAANFYQEVDRM	TTCAAGGACTACGAGGGCATGATGAGCGAGATGCGCAAGGGCGACCTCGTGATCGACGACATCAGCCATCACGAGATGGAGAAGCTCATCGAGATCTACAAGCCCGACATCATCGGCTCCGGCATCAAGGACAAGTTCGTCGTCGAGAAGATGGGCCTGCCGTGCAAGCAGCTCCACAGCTACGACTACGGCGGCCCCTACGCGGCCTTCACCGGCGCGGCGAATTTCTACCAGGAAGTCGATCGCATGGG	Chlorobium luteolum DSM 273
D316	NifD	RNYYIGRTGVDTFVTMQFTSDFQERDIVFGGDKKLEKIIDEVNDLFPLAKGITIQSECPIGLIGDDIEAVSKKKHRESGKTIV	CACGATGGTCTTGCCGCTCTCGCGGTGCTTCTTCTTCGAGACCGCTTCGATATCGTCTCCGATGAGGCCGATCGGGCATTCCGACTGAATCGTGATTCCCTTGGCCAGCGGAAACAGATCGTTGACCTCGTCGATGATCTTCTCGAGCTTCTTGTCACCGCCGAAGACGATGTCACGCTCTTGGAAGTCGGAGGTGAACTGCATCGTCACGAAGGTGTCGACGCCGGTGCGGCCGATATAGTAATTGCGC	Leptothrix cholodnii SP-6
D317	NifD	GLNPLGLSARSKGESPSAGLHIAKNGVLKHMIGLDDTPDEAEFSINILGEYNIGGDAWEIYTLLRKCGIHVTATLSGDVS	GTCGGAGCTCACGTCGCCGGAGAGCGTGGCCGTGACGTGGATGCCGCACTTGCGCAGCAGCGTGTAGATCTCCCACGCGTCGCCGCCGATGTTGTATTCGCCGAGGATGTTGATGCTGAACTCCGCCTCGTCCGGTGTGTCGTCCAGGCCGATCATGTGCTTGAGCACGCCGTTTTTCGCGATGTGGAGTCCGGCGGACGGGCTCTCGCCCTTGGAGCGCGCTCATGAGAGGCCCAGGGGGTTGAGGCCGA	Opitutaceae bacterium TAV5
D318	NifD	GHHIAIAACRDGNCDKISPESKPAFEAPPYDVAIIGDYNIGGDAWSSCILLEEMGLRVIAQWSGDGSLAELEATPKAKLNVL	GCAGGACGTTGAGCTTCGCCTTGGGTGTGGCTTCGAGCTCGGCGAGGCTGCCGTCGCCGGACCACTGTGCGATCACGCGCAGGCCCATCTCCTCCAGTAGGATGCAGGAGGACCAGGCATCGCCGCCGATATTGTAGTCGCCGATGATCGCGACGTCGTAGGGCGGTGCCTCGAATGCCGGTTTGGACTCCGGCGAGATCTTGTCGCAGTTCCCGTCGCGACACGCGGCGATGGCGATGTGGTGGCCTGGG	Bradyrhizobium sp. ztm3
D319	NifD	YGIPWIKVNFIGAESTAKSLRKIAQYFESKKLSDRVEEVIAQEMAALRPIKDAITARCKGKKAALFV	ATACGGCATCCCGTGGATCAAGGTGAACTTCATCGGCGCCGAGTCCACGGCGAAGTCGCTGCGCAAGATCGCGCAGTATTTCGAGAGCAAGAAGCTCAGCGACCGCGTCGAGGAAGTCATCGCGCAGGAGATGGCCGCGCTGCGCCCGATCAAGGACGCGATCACCGCGCGTTGCAAGGGCAAGAAGGCCGCGCTCTTCGTG	Desulfovibrio vulgaris str. 'Miyazaki F'
D320	NifD	YGIPWIKVNFIGAESTAKSLRKIAQYFESKKLSDRVEEVIAQEMAALRPIKDAITARCKGKKAALFV	CACGAAGAGCGCGGCCTTCTTGCCCTTGCAACGCGCGGTGATCGCGTCCTTGATCGGGCGCAGCGCGGCCATCTCCTGCGCGATGACTTCCTCGACGCGGTCGCTGAGCTTCTTGCTCTCGAAATACTGCGCGATCTTGCGCAGCGACTTCGCCGTGGACTCGGCGCCGATGAAGTTCACCTTGATCCACGGGATGCCGTAT	Desulfovibrio vulgaris str. 'Miyazaki F'
D321	NifD	IVPVRCEGFRGVSQSLGHHIANDSIRDWVFDKIAPDAAPRFEPTPYDVAIIGDYNIGGDAWSSRILLEEMGLRVIAQWSGDGS	AGAGAGCCGTCGCCGGACCACTGCGCGATCACCCGCAGCCCCATCTCCTCGAGCAGGATGCGGGACGACCAGGCATCGCCGCCGATGTTGTAGTCGCCGATGATGGCGACGTCATAGGGCGTCGGTTCGAACCTCGGAGCTGCGTCCGGCGCGATCTTGTCGAACACCCAATCCCGGATCGAGTCGTTGGCGATGTGGTGGCCGAGCGACTGCGACACGCCGCGGAAGCCTTCGCAGCGCACGGGCACGAT	Bradyrhizobium sp. Aec12.3
D322	NifD	DYEGMMSEMRKGDLVIDDISHHEMEKLIEIYKPDIIGSGIKDKFVVEKMGLRCKQLHSYDYGGPYAAFTVTASCDQDVHCM	GACTACGAGGGCATGATGAGCGAGATGCGCAAGGGCGACCTCGTGATCGACGACATCAGCCATCACGAGATGGAGAAGCTCATCGAGATCTACAAGCCCGACATCATCGGCTCCGGCATCAAGGACAAGTTCGTCGTCGAGAAGATGGGCCTGCGGTGCAAGCAGCTCCACAGCTACGACTACGGAGGCCCCTACGCGGCCTTCACCGTCACGGCGAGTTGCGACCAGGACGTGCACTGCATGGGATACA	Chlorobium luteolum DSM 273
D323	NifD	HFINAYEDLGMENASTGHEFAHNDDYQRTGDYAKPGTLIYDDVTGYELEKFVEKIQPDLVGSGIKEKYPVQKMGIPFRQMHSW	TCCCAGGAGTGCATCTGACGGAAGGGAATGCCCATCTTCTGCACCGGGTACTTTTCCTTGATTCCGGAACCAACGAGATCCGGCTGGATCTTCTCGACGAACTTCTCGAGCTCATAGCCGGTGACGTCGTCGTAGATCAGCGTGCCCGGCTTGGCGTAGTCACCGGTGCGCTGGTAGTCGTCGTTGTGGGCGAACTCATGGCCGGTGCTGGCGTTCTCCATGCCGAGATCCTCGTAGGCGTTAATGAAGTG	Methylobacterium sp. 4-46
D324	NifD	VFKHMIGLDDTPDEAEFSINILGEYNIGGDAWEIDTLLRKCGIHVTATLSGDVSYDQVKRAHTVQLNTVMCHRSINYIAEMME	CCTCCATCATCTCGGCGATGTAGTTGATCGAGCGGTGGCACATCACGGTGTTCAGCTGCACGGTGTGCGCGCGCTTCACCTGGTCGTAGCTCACGTCGCCGGAGAGCGTGGCCGTGACGTGGATGCCGCACTTGCGCAGCAGCGTGTCGATCTCCCACGCGTCGCCGCCGATGTTGTATTCGCCGAGGATGTTGATGCTGAACTCCGCCTCGTCCGGTGTGTCGTCCAGGCCGATCATGTGTTTGAACAC	Opitutaceae bacterium TAV5
D325	NifD	MSLAKTQSVAEIKARNKELIEEVLKVYPEKTAKRRAKHLNVHEAGKSDCGVKSNIKSVPGVMTIRGC	GCGCAGCCGCGGATCGTCATCACGCCGGGAACAGACTTGATGTTCGACTTCACGCCGCAGTCGGACTTACCGGCTTCATGTACGTTCAAGTGCTTGGCGCGGCGCTTGGCGGTCTTTTCCGGATAGACCTTCAATACTTCTTCGATCAGTTCCTTGTTGCGAGCCTTGATCTCGGCAACGCTCTGCGTCTTGGCTAAACTCATTTTGGCTTTCCTCGCGTTATCCAATTGCGC	Bradyrhizobium oligotrophicum S58
D326	NifD	EKYVFQKRGGPLRQMHSWDYSGPYHGYDGFAIFARDMDMAINSPIWKKAKAPWKAAPKPTLMAAE	ATCCTTGGCTCGCCGGCCCTCCCCGGTCGGGGAGAGCCAGCGTGGGCCGATTACTCCGCCGCCATCAATGTGGGCTTCGGCGCAGCCTTCCACGGCGCCTTGGCCTTCTTCCAGATCGGCGAGTTGATGGCCATGTCCATGTCGCGCGCGAAGATCGCGAACCCGTCATAGCCATGGTAGGGGCCGGAGTAGTCCCAGGAGTGCATCTGCCGTAACGGACCACCCCTCTTCTGGAATACGTACTTCTCC	Bradyrhizobium sp. BTAi1
D327	NifD	HHEMEKLIEIYKPDIIGSGIKDKFVVEKMGLPCKQLHSYDYGGPYAAFTGAANFYQEVDRMVNTKVWKYATPPWEKNPQLRAS	GCCATCACGAGATGGAGAAGCTCATCGAGATCTACAAGCCCGACATCATCGGCTCCGGCATCAAGGACAAGTTCGTCGTCGAGAAGATGGGCCTGCCGTGCAAGCAGCTCCACAGCTACGACTACGGCGGCCCCTACGCGGCCTTCACCGGCGCGGCGAATTTCTACCAGGAAGTCGATCGCATGGTGAACACGAAGGTCTGGAAATACGCCACGCCGCCCTGGGAGAAAAACCCGCAGCTCCGCGCCTCG	Chlorobium luteolum DSM 273
D328	NifD	LHVDADPEKYRARKTPEQIKALEDGGFTFKDYEGMMSEMRKGDLVIDDISHHEMEKLIEIYKPDIIGSGIKDKFVVEKMGLPC	CTCCACGTCGATGCCGACCCTGAGAAATACAGGGCGCGCAAGACACCCGAGCAGATCAAGGCGCTTGAGGACGGCGGGTTCACGTTCAAGGACTACGAGGGCATGATGAGCGAGATGCGCAAGGGCGACCTCGTGATCGACGACATCAGCCATCACGAGATGGAGAAGCTCATCGAGATCTACAAGCCCGACATCATCGGCTCCGGCATCAAGGACAAGTTCGTCGTCGAGAAGATGGGCCTGCCGTGCAA	Chlorobium luteolum DSM 273
D329	NifD	EGMMSEMRKGDLVIDDISHHEMEKLIEIYKPDIIGSGIKDKFVVEKMGLPCKQLHSYDYGGPYAAFTGAANFYQEVDRMVNTK	CCTTCGTGTTCACCATGCGATCGACTTCCTGGTAGAAATTCGCCGCGCCGGTGAAGGCCGCGTAGGGGCCGCCGTAGTCGTAGCTGTGGAGCTGCTTGCACGGCAGGCCCATCTTCTCGACGACGAACTTGTCCTTGATGCCGGAGCCGATGATGTCGGGCTTGTAGATCTCGATGAGCTTCTCCATCTCGTGATGGCTGATGTCGTCGATCACGAGGTCGCCCTTGCGCATCTCGCTCATCATGCCCTCG	Chlorobium luteolum DSM 273
D330	NifD	KYGLPWIKVNFIGADSTAKSLRKIAHYFESKKLKDRVEDDIAQELAGTLPIGAATASSHVTQVSLFVVASRQHPLYDDFR	GATCAAGTACGGGCTCCCGTGGATCAAGGTGAACTTCATCGGCGCGGACTCCACGGCGAAATCCCTCCGGAAGATCGCCCACTATTTCGAGAGCAAAAAGCTGAAGGACCGCGTGGAAGACGACATCGCCCAGGAACTGGCGGGAACACTGCCCATTGGGTAAGCCGCCACCGCCAGCTCCCACGTGACACAAGTCTCCCTCTTCGTGGTGGCGTCGCGGCAGCACCCGCTCTACGATGACTTTCGATAC	Desulfovibrio vulgaris str. 'Miyazaki F'
D331	NifD	AKAKSKEYEGKTIVPVRCEGFRGVSQSLGHHIANDAVRDWIFDKISPEAKPKFESSPYDVAIIGDYNIGGDAWSSRILLEEMG	GGCCCATCTCCTCCAGCAGGATGCGGGAGGACCAGGCATCGCCGCCGATATTGTAGTCGCCGATGATCGCGACGTCGTAAGGCGAGGACTCGAATTTCGGCTTCGCCTCGGGGGAGATCTTGTCGAAGATCCAGTCGCGCACCGCGTCGTTGGCGATGTGGTGGCCGAGCGACTGCGAAACGCCGCGGAAGCCTTCGCACCGCACCGGGACGATGGTCTTGCCCTCATACTCCTTGGACTTCGCCTTCGC	Bradyrhizobium sp. ztm3
D332	NifD	GHHIANDAIRDWVYDKIAPDDPARFETSPYDVAIIGDYNIGGDAWSSRILLLEMVLRVIAQWSCDGSLAELEATPQAKLN	GGTCACCACATCGCCAACGACGCCATCCGCGACTGGGTCTACGACAAGATCGCTCCGGACGATCCGGCGCGCTTCGAGACGTCCCCTTACGACGTTGCCATCATCGGTGACTACAATATCGGTGGCGACGCTTGGTCGTCGCGCATCCTGCTCTTGGAGATGGTTCTGCGCGTCATCGCCCAGTGGTCGTGCGACGGCAGCTTGGCCGAGCTCGAGGCGACTCCGCAAGCAAAGCTCAATGCTCAGCA	Bradyrhizobium sp. S23321
D333	NifD	SKAKSKEYEGKTIVPVRCEGFRGVSQSLGHHIANDAVRDWIFDKISPEAKPTFESSPYDVAIIGDYNIGGDAWSSRILLEEMG	GGCCCATCTCCTCCAGCAGGATGCGGGAGGACCAGGCATCGCCGCCGATATTGTAGTCGCCGATGATCGCGACGTCGTAAGGCGAAGACTCGAACGTCGGCTTGGCCTCGGGGGAGATCTTGTCGAAAATCCAGTCGCGCACCGCGTCGTTGGCGATGTGGTGGCCGAGCGACTGCGAAACGCCGCGGAAGCCTTCGCAGCGCACCGGGACGATGGTCTTGCCCTCATACTCCTTGGACTTCGCCTTCGA	Bradyrhizobium sp. ztm3
D334	NifD	DWIFDKVSPDAKPAFESTPYDVAIIGDYNIGGDALSSRILLEEMGLRVIAQWSGHGSLAELEATTKAKLNVRHRRSMNNHTR	GGACTGGATCTTCGACAAGGTCTCCCCGGACGCGAAGCCGGCGTTCGAGTCCACGCCCTATGACGTCGCGATCATCGGCGATTACAACATCGGCGGCGATGCGTTGTCCTCGCGCATCCTGCTCGAGGAGATGGGCCTGCGGGTGATTGCGCAATGGTCCGGGCACGGCAGCCTCGCCGAGCTGGAAGCAACGACCAAGGCGAAGCTCAACGTCCGGCACCGCTAACGATCGATGAACAACCACACCCGA	Bradyrhizobium sp. Soph313
K101	NifK	GRDHAPKGISEQLRDGKAGTAPKLERKPNEKINFIGGFDGYTVGNIREMKRIFELMGIEYTILADNSDVFDTPTDGEFRMYDG	GCCATCATACATGCGGAACTCGCCGTCAGTCGGGGTATCGAACACGTCGCTGTTGTCGGCGAGAATTGTGTACTCGATCCCCATCAGCTCGAAGATGCGCTTCATCTCGCGGATGTTGCCGACGGTGTAGCCGTCGAAACCGCCGATGAAGTTGATCTTTTCGTTCGGCTTGCGCTCGAGCTTCGGCGCCGTGCCGGCCTTTCCGTCCCGGAGTTGCTCGCTGATTCCTTTCGGCGCGTGGTCACGGCCGG	Bradyrhizobium sp. S23321
K103	NifK	IPVPYAHTPSFIGSHVTGWENMFEGFARTFTADYSGQPGKLPRINLVSGFETYLGNFRVLKRMMEQMEVPCSLLSDPSEVLDT	GGGGTATCCAGCACTTCAGAGGGATCGGAAAGCAGGCTGCACGGCACCTCCATTTGCTCCATCATGCGTTTCAGCACGCGGAAATTGCCGAGATAGGTTTCAAATCCGCTGACCAGGTTGATACGCGGTAACTTGCCCGGTTGCCCGCTGTAATCGGCGGTAAAGGTACGGGCAAAGCCCTCAAACATATTTTCCCAGCCGGTGACATGGCTGCCGATAAAGCTCGGCGTATGCGCGTAAGGCACTGGGAT	Kosakonia oryzae Ola 51
K104	NifK	SLGFANTLPYVHGSQGCVAYFRTYFNRHFKEPIACVSDSMTEDAAVFGGNNNLNTGLQNASAIYKHEIIAVSTTCMAVAIGAD	TCGCTGGGCTTTGCCAATACCCTGCCGTATGTTCACGGCTCCCAGGGGTGCGTGGCCTATTTCCGCACCTATTTTAACCGTCACTTTAAAGAGCCGATTGCCTGTGTTTCCGACTCAATGACGGAAGATGCGGCAGTATTCGGCGGCAACAACAACCTGAACACCGGGTTGCAGAACGCCAGCGCTATTTACAAACACGAAATCATTGCCGTCTCCACCACCTGTATGGCGGTGGCCATCGGCGCAGAT	Kosakonia radicincitans DSM 16656
K105	NifK	KNCHVYPGKDLWHMRSLLFTEPVDFLIGNTYGKYLERDTGTPLIRIGFPIFDRHHKHRYPVWGYQGGLNVLVTILDKIFDEID	GGTCGATCTCGTCGAAGATCTTGTCCAGGATCGTGACCAGCACGTTGAGGCCGCCCTGATAGCCCCACACCGGATAACGATGCTTGTGGTGGCGATCGAAGATCGGGAAGCCGATGCGGATCAGCGGCGTGCCGGTGTCGCGCTCCAGATACTTGCCGTAGGTGTTGCCGATCAGGAAGTCGACCGGCTCGGTGAACAGCAGCGAGCGCATGTGCCAGAGATCCTTGCCGGGATACACGTGGCAGTTCTTG	Bradyrhizobium sp. ORS278
K106	NifK	AHIHGKKFAIYGDPDLCLGLAAFLLELGAEPTHVLATNGNKHWAEKVQAVFDSTPFCKNLHGEPGMGSWAQRRALVTGSGEF	GCGCACATCCATGGCAAGAAGTTCGCAATCTACGGCGATCCGGATCTCTGCCTCGGCCTCGCCGCGTTCCTGCTGGAGCTGGGCGCCGAGCCGACCCATGTGCTCGCCACCAACGGCAACAAGCACTGGGCCGAGAAGGTGCAGGCGGTGTTCGACAGCACGCCATTCTGCAAGAACTTGCACGGGGAACCAGGCATGGGTTCATGGGCACAGCGCCGCGCTCTGGTTACCGGCTCGGGTGAATTCCCG	Bradyrhizobium oligotrophicum S58
K107	NifK	MPQSAEHVLDHVELFRGPEYQQMLAKKKIFENPRDPA	GCCAAGCTCCAAGCTGCAGAATAACGCAACTCGTCTCGCTCTCCGGGAAAGCCCGGGCGATTCCAATCTGATAGTGAAGGATTTCACCGATGCCGCAGAGTGCCGAACACGTGCTCGATCATGTCGAACTGTTCCGCGGTCCAGAATACCAGCAAATGCTGGCGAAGAAGAAGATATTCGAGAATCCGCGCGATCCTGCCG	Bradyrhizobium diazoefficiens USDA 122
K108	NifK	MPQSAEHVLDHVELFRGPEYQQMLAKKKIFENPRDPA	CGGCAGGATCGCGCGGATTCTCGAATATCTTCTTCTTCGCCAGCATTTGCTGGTATTCTGGACCGCGGAACAGTTCGACATGATCGAGCACGTGTTCGGCACTCTGCGGCATCGGTGAAATCCTTCACTATCAGATTGGAATCGCCCGGGCTTTCCCGGAGAGCGAGACGAGTTGCGTTATTCTGCAGCTTGGAGCTTGGC	Bradyrhizobium diazoefficiens USDA 122
K109	NifK	SFNYPVGLSATDDFIVALSRISGKEIPEQLARERGRLVDAIADSSAHVHGKKFAIYG	GCCATAGATCGCGAACTTTTTGCCATGAACATGAGCGCTTGAGTCGGCAATGGCATCAACCAAGCGGCCACGTTCTCGCGCGAGTTGCTCCGGAATCTCCTTGCCGCTGATGCGTGACAGCGCGACGATAAAGTCATCCGTTGCTGATAAGCCTACCGGGTAGTTGAAGGA	Bradyrhizobium diazoefficiens USDA 122
K110	NifK	SFNYPVGLSATDDFIVALSRISGKEIPEQLARERGRLVDAIADSSAHVHGKKFAIYG	TCCTTCAACTACCCGGTAGGCTTATCAGCAACGGATGACTTTATCGTCGCGCTGTCACGCATCAGCGGCAAGGAGATTCCGGAGCAACTCGCGCGAGAACGTGGCCGCTTGGTTGATGCCATTGCCGACTCAAGCGCTCATGTTCATGGCAAAAAGTTCGCGATCTATGGC	Bradyrhizobium diazoefficiens USDA 122
K111	NifK	LARVALVLNPAKDCQPLGVVFAAAGFERTMSFVHGSQGCVAYYRSHLSRHFKEPCSAVSSSMTEDAAVFGGLNNMVDGLANTY	AGTAGGTGTTGGCGAGCCCGTCAACCATGTTGTTGAGGCCGCCGAAAACTGCCGCATCCTCGGTCATCGACGAGGAAACAGCGCTGCACGGCTCCTTGAAATGGCGCGAGAGATGCGAGCGGTAATAGGCGACGCAGCCCTGGCTGCCATGCACGAAGCTCATTGTCCGCTCGAAGCCGGCGGCGGCGAAGACGACGCCGAGCGGCTGGCAGTCCTTGGCGGGATTGAGGACGAGCGCCACACGTGCGAGG	Sinorhizobium americanum CCGM7
K112	NifK	CHAYAGKDLWHMRSLLFTEPVDFLIGNTYGKYLERDTGTPLIRIGFPVFDRHHHHRYPVWGYQGGMNVLVKILDKIFDEIDRN	TGCCACGCCTACGCGGGCAAGGATCTCTGGCACATGCGCTCGCTGCTGTTCACCGAGCCGGTCGATTTCCTGATCGGCAACACCTACGGCAAGTACCTCGAGCGCGATACCGGCACGCCGCTGATCCGCATCGGCTTCCCGGTATTCGACCGCCATCACCACCACCGCTATCCGGTGTGGGGTTATCAGGGCGGCATGAACGTGCTGGTGAAGATCCTCGACAAGATCTTCGATGAAATCGACAGGAACA	Bradyrhizobium sp. S23321
K113	NifK	DSLSGNPCGKCRDRETGPPRYRIGFQVFDRHHPHRYPVWGYQGGMNVLVKILDKIFDEIDRNTNVPAKTDYSFDIIR	GCACGTCTCCGTGCAATCAGCGGATGATGTCGAAGCTATAGTCGGTCTTGGCCGGCACGTTGGTGTTCCTGTCGATTTCATCGAAGATCTTGTCGAGGATCTTCACCAGCACGTTCATGCCGCCCTGATAACCCCACACCGGATAGCGGTGGGGGTGATGGCGGTCGAATACCTGGAAGCCGATGCGGTACCGCGGCGGGCCTGTTTCGCGGTCTCGGCACTTGCCGCAGGGGTTGCCGCTCAGGGAATCG	Azorhizobium caulinodans ORS 571
K114	NifK	LDPFELFRGPEYQQMLANKKKIFENPRDPAEVERIREWAKTPEYREKNFAREALTVNPAKACQPLGAVFVAVGFEGTMPFVHG	GCCGTGCACGAACGGCATCGTGCCTTCGAATCCGACCGCGACGAACACGGCGCCGAGCGGCTGGCAGGCCTTGGCCGGATTGACGGTCAGAGCCTCGCGGGCGAAATTCTTCTCGCGATATTCGGGCGTCTTGGCCCATTCGCGGATGCGCTCGACCTCGGCGGGATCGCGCGGGTTCTCGAAAATCTTCTTCTTGTTGGCCAGCATCTGCTGGTATTCGGGACCCCGGAAAAGCTCGAAGGGATCGAGC	Bradyrhizobium oligotrophicum S58
K115	NifK	AEHVLDHFELFRGPEYQQMLANKKKMFENPRDPAEVERIREWAKTPEYREKNFAREALTVNPAKACQPLGAVFVAVGLDGTMP	GCCGAACATGTGCTCGATCACTTCGAGCTTTTCCGTGGTCCCGAATACCAGCAGATGCTGGCCAACAAGAAGAAGATGTTCGAGAACCCGCGCGATCCCGCCGAGGTCGAGCGCATCCGCGAATGGGCCAAGACGCCCGAATATCGCGAGAAGAATTTCGCCCGCGAGGCTCTGACCGTCAATCCGGCCAAGGCCTGCCAGCCGCTCGGCGCCGTGTTCGTCGCGGTCGGATTAGATGGCACGATGCCGTT	Bradyrhizobium oligotrophicum S58
K116	NifK	LNAFIKTSKEKGSVPAEFDVPFAHTPAFVGSHVTGYDNALKGIIEHFWDGKAGTAPKLERKPNEKINFIGGLAGDTL	CCTAAATGCCTTCATCAAGACGTCCAAGGAAAAGGGCTCGGTTCCCGCCGAGTTCGACGTTCCCTTCGCCCACACGCCCGCGTTCGTCGGCAGCCATGTCACCGGCTATGACAACGCGCTGAAGGGAATCATCGAGCACTTCTGGGACGGAAAGGCCGGCACGGCGCCGAAGCTCGAGCGCAAGCCGAACGAAAAGATCAACTTCATCGGCGGTTTGGCAGGGGACACCCTCCGCGACCACCACGCGAGCG	Bradyrhizobium sp. S23321
K117	NifK	IYGDPDLIISITSFLLEMGAEPVHILCNNGDEAFKKEMEAILAASPFGKEAKVWIQKDLWHFRSLLFTEPVDFFVGNSYGKYL	ATCTACGGCGATCCCGACTTGATCATCTCCATCACCAGCTTCTTGTTAGAAATGGGTGCTGAACCAGTACACATCCTCTGCAACAATGGCGATGAAGCTTTCAAGAAAGAAATGGAAGCTATCCTCGCTGCTAGCCCCTTCGGTAAAGAAGCTAAAGTCTGGATTCAAAAAGACTTATGGCACTTCCGCAGCTTGTTGTTCACAGAACCCGTAGACTTCTTCGTTGGTAACTCCTACGGTAAGTACCTGTG	Anabaena sp. CA
K118	NifK	STLTECAAAHGSLSNMMDGLAHPYNWHMPKSIAVSTTCMAEVIGDDLNAFIKTSKDKGSVPAEYDVPFAHTPAFVGSHVTGYD	GTCGTAGCCGGTGACATGGCTGCCGACGAACGCGGGCGTATGCGCGAACGGGACGTCGTATTCGGCCGGAACCGAACCCTTATCCTTCGACGTCTTGATGAAGGCGTTGAGGTCGTCGCCGATCACTTCCGCCATGCAGGTGGTAGAGACCGCGATACTCTTCGGCATGTGCCAGTTGTAGGGGTGGGCGAGGCCGTCCATCATGTTGCTGAGGCTGCCGTGCGCAGCTGCGCACTCCGTCAGCGTCGACG	Bradyrhizobium oligotrophicum S58
K119	NifK	ITQSAEHVLDHFELIRGPEYQQMLPQKKKMFQNPRDPAEVERIREWAKTPEHREKNFAREALPVNPAKACQP	CGGCTGGCAGGCCTTGGCCGGATTGACGGGTAGTGCCTCGCGGGCGAAATTCTTCTCGCGATGTTCGGGCGTCTTGGCCCATTCACGGATGCGCTCGACCTCGGCAGGATCGCGCGGGTTTTGGAACATCTTCTTCTTTTGCGGCAGCATCTGCTGGTATTCGGGTCCACGGATAAGTTCGAAGTGATCGAGCACATGTTCGGCACTCTGCGTTATGGGCTAATCTCGGCTATTTTCCCGTGTCGATCAGG	Bradyrhizobium sp. BTAi1
K120	NifK	NKKKMFENPRDPAEVERVREWAKTPEYREKNFAREALTVNPAKACQPLGAVFVAVGFEGTLPFVHGSQGCVAYYRSHLSRHFK	CCTTGAAATGACGCGACAGATGGCTGCGGTAGTACGCGACGCAGCCCTGCGAGCCATGGACGAAGGGCAGCGTGCCTTCGAACCCGACCGCGACGAACACCGCGCCGAGCGGCTGGCAGGCCTTGGCCGGATTGACGGTCAGCGCCTCGCGCGCAAAGTTCTTCTCACGATATTCCGGCGTCTTGGCCCATTCGCGCACCCGCTCCACCTCGGCAGGATCACGCGGATTTTCGAACATCTTCTTCTTGTT	Bradyrhizobium oligotrophicum S58
K121	NifK	KKEMEAILAASPFCKEAKVWIQKDLWLFRSLLFTEPVDFFVGNSYGKYLWRDTNIPMVRIGYPIFDRHHLHRYATLGYQGGLN	TGTTTAGACCACCTTGGTAGCCGAGGGTAGCGTAGCGGTGTAAGTGATGGCGATCGAAGATAGGATAACCAATCCGCACCATTGGGATATTGGTATCGCGCCACAGGTACTTACCGTAGGAGTTACCAACGAAGAAGTCTACGGGTTCTGTGAACAACAAGCTGCGGAAGAGCCATAAGTCTTTTTGAATCCAGACTTTAGCTTCTTTACAGAAGGGGCTAGCAGCGAGGATAGCTTCCATTTCTTTCTTT	Nostoc sp. NIES-2111
K122	NifK	QSHGQEVAAFNHPIGVSATDDFLMTLSRIAGKPIAKALEQERGRLLDAMADSSAHIHGKKFAIYGDPDLCY	GCTCGGCACCGAGCTCGAGCAGGAACGCCGCCAGGCCGTAGCAGAGGTCCGGATCGCCATAGATCGCGAACTTCTTGCCATGGATATGCGCACTGGAGTCCGCCATGGCGTCGAGCAGGCGACCACGCTCCTGCTCGAGCGCCTTCGCAATCGGCTTGCCCGCGATGCGCGACAGCGTCATCAGGAAGTCGTCGGTAGCGCTGACGCCGATCGGATGGTTGAAGGCCGCGACTTCCTGGCCGTGGCTCTGG	Bradyrhizobium sp. S23321
K123	NifK	QQYCTEKTLPLIQSHGQEVAAFNHPIGVSATDDFLMTLSRIAGKPIAKALEQERGRLLDAMADSRAHIHGKKFAIYGDPDLCY	CAGCAATACTGCACCGAGAAGACGCTGCCTCTTATCCAGAGCCACGGCCAGGAAGTCGCGGCCTTCAACCATCCGATCGGCGTCAGCGCTACCGACGACTTCCTGATGACGCTGTCGCGCATCGCGGGCAAGCCGATTGCGAAGGCGCTCGAGCAGGAGCGTGGTCGCCTGCTCGACGCCATGGCGGACTCCAGGGCGCATATCCATGGCAAGAAGTTCGCGATCTATGGCGATCCGGACCTCTGCTACGG	Bradyrhizobium sp. S23321
K124	NifK	RKPNGKINFIGGFDGYTVGNIREIKRIFELMGIEYTILADNSDVFDTPTDGEFRMYDGGTTLEDAANAIHAAATISMQQYCTE	TCTCTGTGCAATATTGCTGCATGGAGATGGTGGCAGCGGCGTGGATCGCATTCGCCGCGTCCTCCAACGTGGTGCCGCCGTCATACATGCGGAACTCGCCGTCGGTCGGGGTATCGAACACGTCGCTGTTGTCGGCGAGGATCGTGTATTCGATGCCCATCAGCTCGAAGATGCGCTTGATCTCGCGGATGTTACCGACGGTGTAGCCGTCGAAGCCACCGATGAAGTTGATCTTGCCGTTCGGCTTGCG	Bradyrhizobium sp. S23321
K125	NifK	CMAEVIGDDLNAFIKTAKEKGSVPAEYDVPFAHTPAFVGSHVTGYDNALKGILEHFWHGKAGTAPKLERKPNGKTNFLGGFD	CTTGTATGGCGGAGGTCATCGGCGATGACCTCAACGCCTTTATCAAGACGGCCAAGGAGAAGGGCTCGGTTCCGGCGGAGTACGATGTTCCCTTCGCCCACACGCCGGCCTTCGTCGGCAGCCACGTCACCGGATATGATAACGCGCTGAAGGGCATTCTGGAGCACTTCTGGCACGGCAAGGCCGGCACCGCGCCAAAGCTTGAGCGCAAGCCGAACGGCAAGACCAACTTCCTCGGGGGCTTCGACGG	Azorhizobium caulinodans ORS 571
K126	NifK	SRISGKEIPEQLARERGRLVDAIADSSAHVHGKKFAIYGDPDLCYGLAAFLLELGAEPTHVLSTNGNKAWQEKMQALLASSPF	GTCACGCATCAGCGGCAAGGAGATTCCGGAGCAACTCGCGCGAGAACGTGGCCGCTTGGTTGATGCCATTGCCGACTCAAGCGCTCATGTTCATGGCAAAAAGTTCGCGATCTATGGCGATCCGGATCTTTGCTATGGATTGGCTGCGTTTCTGCTCGAACTCGGCGCCGAGCCGACCCATGTGCTGTCCACCAATGGCAACAAAGCGTGGCAGGAGAAAATGCAGGCGCTGCTTGCAAGCTCGCCATTTG	Bradyrhizobium diazoefficiens USDA 122
K127	NifK	EKMQTFLACAPFVQGFHVYPGADLCHIRSLLFTEPVDFLIGNTYGKYLERDTATPLIRIGFPIFDRHHHHRSPI	ATATGGGGGAGCGGTGATGGTGATGCCGGTCGAAAATCGGAAAGCCGATGCGGATCAGTGGCGTTGCGGTATCACGCTCCAGATACTTCCCATAGGTGTTGCCAATAAGAAAATCGACCGGCTCGGTGAACAAGAGTGAACGGATGTGACAGAGATCCGCCCCCGGATAGACATGGAAGCCCTGTACAAATGGCGCGCATGCAAGAAACGTCTGCATTTTCTCCGTCTCAGATTACTTGCAATAGGGGGG	Bradyrhizobium diazoefficiens USDA 122
K128	NifK	GDPDMCLGLAAFLLELGAEPTHVLATNGNKAWAAKMQELFDSSPFGANCHVYPGKDLWHMRSL	GCAGCGAGCGCATGTGCCACAGATCCTTGCCGGGATAGACGTGGCAGTTGGCGCCGAAGGGCGAGCTGTCGAACAGCTCTTGCATCTTCGCCGCCCAGGCCTTGTTGCCGTTGGTGGCGAGCACATGGGTGGGTTCCGCACCCAGCTCCAGCAGGAAGGCGGCAAGGCCGAGGCACATGTCCGGATCGCCAT	Azorhizobium caulinodans ORS 571
K129	NifK	GDPDMCLGLAAFLLELGAEPTHVIATNGNKAWAAKMQELVDSSHFGANCHVYPGKDLWHMRSL	ATGGCGATCCGGACATGTGCCTCGGCCTTGCCGCCTTCCTGCTGGAGCTGGGTGCGGAACCCACCCATGTGATAGCCACCAACGGCAACAAGGCCTGGGCGGCGAAGATGCAAGAGCTGGTCGACAGCTCGCACTTCGGCGCCAACTGCCACGTCTATCCCGGCAAGGATCTGTGGCACATGCGCTCGCTGC	Azorhizobium caulinodans ORS 571
K130	NifK	IPQDFPVPFAHTPSFVGSHVTGYDNMMKGILSNLTEGKKKATSNGKINFIPGFDTYVGNNRELKRMLGVMDVDYTILSDSSDY	AAGTAGTCGCTGCTATCAGAGAGGATGGTGTAGTCAACATCCATTACACCCAGCATCCGCTTCAATTCACGGTTGTTACCTACATAGGTATCAAAACCAGGAATGAAGTTAATTTTACCGTTGCTGGTAGCTTTCTTCTTACCTTCTGTCAAATTAGACAGAATACCCTTCATCATGTTGTCGTAACCAGTTACGTGAGAACCAACGAAACTGGGGGTGTGAGCGAAGGGAACGGGGAAGTCTTGAGGAAT	Nostoc sp. NIES-2111
K131	NifK	NGNKGWAEKMEGLFASSPFGKNCHAYAGKDLWHMRSLLFTEPVDFLIGNTYGKYLERDTGTPLIRIGFPVFDRHHHHRYPVWG	GCCCCACACCGGATAGCGATGGTGGTGATGGCGATCGAACACCGGGAAGCCGATGCGGATCAGCGGCGTGCCGGTGTCGCGCTCCAGGTACTTGCCGTAGGTGTTACCGATCAGGAAGTCGACCGGCTCGGTGAACAGCAGCGAGCGCATGTGCCAGAGATCCTTGCCGGCATAAGCGTGGCAGTTCTTGCCGAACGGAGAACTCGCGAACAGCCCCTCCATCTTCTCGGCCCAGCCCTTGTTGCCGTTGG	Bradyrhizobium sp. S23321
K132	NifK	AFNHPVGVSATDEFLMTLSRITGKAIPKALEQERGRLVDAMADSSAHIHGKKFAIYGDPDLCYGLAAFLLELGAEPTHVLSTT	GCCTTTAACCATCCGGTTGGCGTCAGCGCCACTGACGAATTCCTGATGACGCTGTCGCGGATCACCGGCAAGGCGATCCCGAAGGCGCTGGAGCAGGAGCGCGGCCGCCTGGTCGACGCCATGGCCGACTCCAGCGCGCATATCCACGGCAAGAAGTTCGCGATCTACGGCGATCCGGACCTCTGCTACGGTCTCGCGGCGTTCCTGCTCGAGCTCGGTGCCGAGCCGACCCACGTGCTCTCGACCACCGG	Bradyrhizobium oligotrophicum S58
K133	NifK	AVFGGLNNMVEGMQVAYQLYKPKMIAVCTTCMAEVIGDDLGAFITNSKNAGSIPQDFPVPFAHTHSFVVSNVTGYDNMMKGI	GCAGTATTCGGTGGCTTGAACAACATGGTTGAAGGTATGCAAGTTGCGTACCAACTGTACAAGCCCAAGATGATTGCTGTTTGCACCACCTGTATGGCTGAGGTAATTGGTGACGACTTAGGCGCGTTCATCACCAACTCTAAGAATGCTGGTTCCATTCCTCAAGACTTCCCCGTTCCCTTCGCTCACACCCACAGTTTCGTTGTTTCTAACGTAACTGGTTACGACAACATGATGAAGGGTATT	Nostoc sp. NIES-2111
K134	NifK	YTVGNLREIKRILELMGIQHTVLADNSEVFDTPTDGEFRMYDGGTTLKDAANAIHAKATISMQQWCTEKTLSFAAEHG	GGCCATGCTCTGCCGCAAATGACAGCGTTTTTTCCGTGCACCATTGCTGCATGGAGATGGTCGCCTTGGCGTGAATCGCGTTCGCCGCATCCTTCAGCGTCGTACCACCGTCATACATCCGGAATTCGCCGTCTGTCGGAGTGTCGAACACTTCAGAATTGTCGGCGAGAACTGTGTGCTGGATGCCCATCAATTCCAAGATGCGCTTAATCTCGCGAAGGTTCCCGACGGTATAT	Bradyrhizobium diazoefficiens USDA 122
K135	NifK	YTVGNLREIKRILELMGIQHTVLADNSEVFDTPTDGEFRMYDGGTTLKDAANAIHAKATISMQQWCTEKTLSFAAEHG	ATATACCGTCGGGAACCTTCGCGAGATTAAGCGCATCTTGGAATTGATGGGCATCCAGCACACAGTTCTCGCCGACAATTCTGAAGTGTTCGACACTCCGACAGACGGCGAATTCCGGATGTATGACGGTGGTACGACGCTGAAGGATGCGGCGAACGCGATTCACGCCAAGGCGACCATCTCCATGCAGCAATGGTGCACGGAAAAAACGCTGTCATTTGCGGCAGAGCATGGCC	Bradyrhizobium diazoefficiens USDA 122
K136	NifK	MTQSAEHVLDHFELFRGPEYQQMLANKKKMFENPRDPAEVERIREWAKTPEYREKNFA	CCCACGGCCTGGCTCTCCTTCGGCGGAGAGCCGGCGCTCCCTGATCGACACAGGACAATAGAGAGGGTTATCCCATGACGCAGAGTGCCGAACATGTGCTCGATCACTTCGAGCTTTTCCGTGGTCCCGAATACCAGCAGATGCTGGCGAACAAGAAGAAGATGTTCGAGAACCCGCGCGATCCCGCCGAGGTCGAGCGCATCCGCGAATGGGCCAAGACGCCCGAATATCGCGAGAAGAATTTCGCCCG	Bradyrhizobium oligotrophicum S58
K137	NifK	DALTLERGRLVDMMLDSHTWLHGKKFGLYGDPDFVMGLTRFLLELGCEPTVILSHNANKRWQKAMKKMLDASPYGQESEVFI	CCGACGCTCTGACCCTGGAGCGCGGCCGGCTGGTCGACATGATGCTGGATTCCCACACCTGGCTGCATGGCAAAAAATTCGGCCTCTACGGCGATCCGGATTTCGTAATGGGGCTGACGCGCTTCCTGCTGGAGCTGGGCTGCGAGCCGACGGTGATCCTCAGCCATAACGCCAATAAACGCTGGCAAAAAGCGATGAAGAAAATGCTCGATGCCTCGCCGTACGGTCAGGAAAGCGAAGTGTTCATCAA	Klebsiella variicola At-22
K138	NifK	SNNRWQKCRNKMMDASPNSTEREVFINCGLWHFWSLMFTRRLDFMIGTSYGKFIQRDTLAKGKAFEVPLIVLGLPMLHRHHLH	GTGCAGATGATGGCGGTGCAACATCGGCAAACCCAGAACGATCAGCGGCACTTCGAAGGCTTTGCCCTTTGCCAAGGTATCGCGCTGGATAAACTTGCCGTAGGAGGTACCGATCATAAAGTCCAGTCTACGGGTGAACATCAGCGACCAGAAATGCCACAAGCCGCAGTTGATGAACACTTCCCTCTCCGTACTGTTCGGCGAGGCATCCATCATTTTATTCCTGCACTTTTGCCAGCGGTTATTGGAGT	Klebsiella variicola GJ3
K139	NifK	DYTILADTSDGFDTPSDGEFRMYDGGTTLEDAANAIHAKATISVQHYSTEKTLPLIAGHGKETVESNHPFVVTATADLTMT	CGACTACACCATCCTCGCCGACACCAGCGACGGCTTCGACACCCCGTCCGACGGCGAGTTCCGCATGTATGACGGCGGCACCACGCTGGAGGATGCCGCCAACGCGATCCACGCCAAGGCGACGATCTCGGTGCAGCATTATTCCACCGAGAAGACGTTGCCGCTCATCGCCGGCCACGGCAAGGAAACGGTAGAGTCCAATCATCCGTTCGTCGTCACTGCCACCGCCGATTTAACTATGACATCTGAT	Sphingomonas hengshuiensis WHSC-8
K140	NifK	HFELFRGPEYQQMLANKKALFENPHDPAEVERIREWAKTPEYREKNFAREALTVNPAKACQPLGAVFVAVGFEGTLPFVHGSQ	CACTTCGAGCTGTTCCGGGGTCCGGAATACCAGCAGATGCTGGCCAACAAGAAAGCCCTCTTCGAGAATCCGCATGATCCCGCGGAGGTCGAGCGCATCCGCGAATGGGCCAAGACGCCCGAATACCGGGAGAAGAACTTTGCCCGCGAAGCGCTGACCGTCAACCCCGCCAAGGCCTGCCAGCCTCTCGGCGCGGTGTTCGTCGCGGTCGGCTTCGAGGGCACGCTGCCCTTCGTGCACGGCTCGCAGGG	Bradyrhizobium sp. S23321
K141	NifK	SRGGVAYYRSLLSRPFKAPSSCVSSSMTEDAAVFGGLNNMIDGLANTYNMYKPKMIAVSTTCMAEVIGDDLNAFIKTSKEK	CTTCTCCTTCGACGTCTTGATGAAGGCGTTGAGGTCGTCGCCGATCACTTCCGCCATGCAGGTGGTGGAGACCGCGATCATCTTCGGCTTGTACATGTTGTAGGTGTTGGCAAGCCCGTCGATCATGTTGTTCAAGCCGCCGAACACGGCCGCGTCTTCCGTCATCGAGGAGGAGACGCAGGAGCTCGGCGCCTTGAATGGCCGCGACAGAAGGCTGCGGTAATAGGCGACGCCGCCCCTCGAGCAGCTA	Bradyrhizobium sp. S23321
K142	NifK	TLPFVHGSQGCVAYYRSHLSRHFKEPSSCVSSSMTEDAAVFGGLNNMIDGLANTYNMYKPKMIAVSTTCMAEVIGDDLNAFIK	ACGCTACCCTTCGTCCACGGCTCGCAGGGCTGCGTCGCCTATTATCGCAGTCATCTGTCTCGGCACTTCAAGGAGCCGAGCTCCTGCGTCTCTTCGTCGATGACGGAAGACGCGGCGGTATTCGGCGGCCTGAACAACATGATCGACGGCCTCGCCAACACCTACAACATGTACAAGCCGAAGATGATCGCCGTCTCCACCACCTGCATGGCAGAGGTGATCGGCGACGACCTCAACGCCTTCATCAAGC	Bradyrhizobium sp. S23321
K143	NifK	VAFYRSHLSRHFKEPSSCVSSSMTEDAAVFGGLNNMIDGLANTYNMYKPKMIAVSTTCMAEVIGDDLNAFIKTAKEKGSVPNE	CTCGTTGGGAACGGAGCCCTTTTCCTTGGCTGTCTTGATGAAGGCGTTGAGGTCGTCGCCGATCACCTCTGCCATGCAGGTGGTGGAGACGGCGATCATCTTCGGCTTGTACATGTTGTAGGTGTTGGCGAGGCCGTCGATCATGTTGTTCAGGCCGCCGAATACCGCCGCGTCTTCCGTCATCGACGAAGAGACGCAGGAGCTCGGCTCCTTGAAGTGCCGAGACAGGTGACTGCGATAAAAGGCGACG	Bradyrhizobium sp. S23321
K144	NifK	FIQRDTLAKGEQFEVPLIRLGFPLFDRHHLHRQTTWGYEGAMSMLTTLVNAVLEKVDRETIKLGKTDYGFDLIR	AATTCATCCAGCGCGACACCCTCGCCAAAGGCGAGCAATTCGAAGTGCCGCTGATTCGCCTCGGATTCCCGCTGTTTGATCGCCATCACCTGCATCGCCAGACCACCTGGGGTTACGAAGGGGCGATGAGCATGCTGACCACGCTGGTGAACGCGGTGCTGGAAAAAGTGGACAGAGAAACCATCAAACTCGGCAAAACCGATTACGGCTTCGACCTTATCCGTTAACCAACACAGGCCCCGCC	Kosakonia radicincitans DSM 16656
K145	NifK	EFIQRDTLAKGEQFEVPLIRLGFPLFDRHHLHRQTTWGYEGAMSMLTTLVNAVLEKVDRETIKLGKTDYGFDLIR	GGCGGGGCCTGTGTTGGTTAACGGATAAGGTCGAAGCCGTAATCGGTTTTGCCGAGTTTGATGGTTTCTCTGTCCACTTTTTCCAGCACCGCGTTCACCAGCGTGGTCAGCATGCTCATCGCCCCTTCGTAACCCCAGGTGGTCTGGCGATGCAGGTGATGGCGATCAAACAGCGGGAATCCGAGGCGAATCAGCGGCACTTCGAATTGCTCGCCTTTGGCGAGGGTGTCGCGCTGGATGAATTCTTTCT	Kosakonia radicincitans DSM 16656
K146	NifK	MGIEYTILADNSDVFDTPTDGEFRMYDGGTTLEDAANAIHAKATISMQQYCTEKTLPFIGGHGQEVRAFYPPHLAAANAHILM	GATGGGGATCGAGTACACGATTCTCGCCGACAACAGCGACGTGTTCGATACCCCGACGGACGGCGAGTTCCGCATGTATGATGGCGGCACCACGCTGGAGGATGCCGCCAACGCGATCCATGCCAAGGCCACCATCTCCATGCAGCAATATTGCACGGAGAAGACGCTGCCCTTCATCGGCGGTCATGGGCAGGAGGTCCGCGCCTTCTACCCACCGCACCTCGCCGCGGCAAACGCCCACATTCTGATGA	Bradyrhizobium sp. S23321
K147	NifK	GGTGLEFVSFNHPNCVGATDVLLMTLSRIAGKPIAKALEQERGRLLDAMADSSAHIHGKKFAIYGDPDLCY	GCTCGGCGCCGAGTTCGAGCAGGAACGCCGCCAGGCCATAGCAGAGGTCGGGATCGCCATAGATCGCGAATTTCTTGCCATGGATATGCGCACTGGAATCCGCCATGGCGTCGAGCAGACGGCCGCGCTCCTGCTCGAGCGCCTTCGCGATCGGTTTGCCCGCGATGCGCGAGAGCGTCATCAGAAGCACGTCGGTGGCGCCGACGCAGTTCGGGTGGTTGAAGGAGACGAACTCCAGCCCCGTACCGCCG	Bradyrhizobium sp. S23321
K149	NifK	FWDGKAGTAPKLERTENDKINFIGGFDGYTVGNMREVKRIFGLMGIDYTILADNSEVFDTPTDGEFRMYDGGTTLEEAAAAIN	CTTCTGGGACGGCAAGGCCGGCACGGCGCCCAAGCTCGAACGCACCGAGAATGACAAGATCAACTTCATTGGCGGATTCGACGGCTATACGGTCGGCAATATGCGCGAGGTCAAGCGCATCTTCGGCTTGATGGGCATCGACTACACAATCCTCGCCGACAACAGCGAAGTCTTCGACACGCCGACCGACGGCGAGTTCCGCATGTATGACGGCGGCACGACTCTGGAAGAAGCCGCGGCAGCGATCAACG	Methylocystis sp. SC2
K150	NifK	KINFSGGFAGYTCTNIREVKRVLGLMGLDYTILPDSSEVFDTPTDGEFRMYDGGTTLEEAAAAINAKATISMQEYCTEKTLPL	CAGCGGGAGCGTCTTCTCGGTGCAATATTCCTGCATCGAGATCGTCGCCTTGGCGTTGATCGCTGCCGCGGCTTCTTCCAGCGTCGTGCCGCCGTCATACATGCGGAACTCGCCGTCTGTGGGCGTGTCGAAGACTTCGCTGCTGTCGGGGAGGATTGTGTAGTCGAGGCCCATCAAGCCGAGGACGCGCTTTACCTCTCGTATATTGGTGCACGTATAGCCGGCGAATCCGCCACTGAAGTTGATCTTAT	Methylocystis sp. SC2
K151	NifK	SFFDDNIKEGAERVIAKYQPLMDAVIAKYRPRLEGKTVMLFVGGLRPRHVIGAYEDLGMEVVGTGYEFGHNDDYQRTAQHYVK	CCTTGACGTAGTGCTGTGCAGTGCGCTGATAGTCGTCGTTGTGGCCAAACTCATAGCCGGTTCCGACAACCTCCATGCCAAGATCCTCATAGGCGCCGATCACATGGCGGGGACGCAAGCCGCCGACGAACAGCATCACGGTCTTGCCTTCCAGCCGAGGCCGGTACTTGGCGATCACCGCATCCATCAGCGGCTGATACTTGGCGATGACGCGCTCGGCACCTTCCTTGATATTGTCGTCGAAGAAGCTT	Bradyrhizobium oligotrophicum S58
K152	NifK	PYGRDSEVFINCDLWHFRSLMFTRQPDFMIGNSYAKFIQRDTLAKGEQFEVPLIRLGFPLFDRHHLHHQTTWGYEGAMSMLTT	AGCGTGGTCAGCATGCTCATCGCCCCTTCGTAACCCCAGGTGGTCTGGTGATGCAGGTGATGGCGATCAAACAGCGGGAATCCGAGGCGAATCAGCGGCACTTCGAATTGCTCGCCTTTGGCGAGGGTGTCGCGCTGGATGAATTTGGCGTAGGAGTTACCGATCATAAAGTCCGGCTGGCGGGTAAACATCAGGGAACGGAAATGCCACAAATCACAGTTGATAAAGACTTCGCTGTCCCTGCCATAAGG	Pantoea sp. At-9b
K153	NifK	MPQSAEHVLDHVELFRGPEYQQMLAKKKIFENPRDPAEVERIKEWTKTAEYREKNFAREALAV	TTTACCGCCAGCGCCTCCCGCGCGAAGTTTTTTTCGCGATATTCGGCCGTTTTGGTCCATTCCTTGATACGTTCGACCTCGGCAGGATCGCGCGGATTCTCGAATATCTTCTTCTTCGCCAGCATTTGCTGGTATTCTGGACCGCGGAACAGTTCGACATGATCGAGCACGTGTTCGGCACTCTGCGGCATCGGTGAAATCCTTCACTATCAGATTGGAATCGCCCGGGCTTTCCCGGAGAGCGAGACGAG	Bradyrhizobium diazoefficiens USDA 122
K154	NifK	KEWTKTA*VRGKNFAREALAVNPAKACQPIGAVFASVGFERTLPFVHGSQGCVAYYRSHLSRHFKEPSSCVSSSMAEDAAVFG	GCCGAATACGGCAGCATCTTCCGCCATTGATGAAGAGACACAGGAGCTAGGCTCCTTGAAGTGCCGCGACAAATGACTGCGGTAATAGGCCACACAGCCTTGGCTGCCGTGGACGAAGGGCAGCGTGCGCTCAAAGCCGACAGAGGCGAATACGGCGCCAATCGGCTGACACGCCTTCGCCGGATTTACCGCCAGCGCCTCCCGCGCGAAGTTTTTTCCGCGAACTTAGGCCGTTTTGGTCCATTCCTTGA	Bradyrhizobium japonicum J5
K155	NifK	IDTFVTMQFTSGFQEKDIVFGGDKKLAKIIDEIQDLFPLNHGITIQSECPIGLIGDDIEAVSKSKSKEYDGKTIVPVRCEGFR	CCGCGGAAACCTTCGCACCGCACCGGCACGATGGTCTTGCCGTCATATTCCTTCGACTTCGACTTCGACACGGCCTCGATGTCGTCGCCGATCAGGCCGATCGGGCATTCCGACTGGATGGTGATGCCGTGATTGAGCGGGAACAGATCCTGGATCTCATCGATGATCTTGGCGAGCTTCTTGTCGCCGCCGAACACGATGTCCTTTTCCTGGAAGCCGGAGGTGAACTGCATGGTCACGAAGGTGTCGAT	Bradyrhizobium sp. ztm3
K156	NifK	WLRL*LFFTEPVDFLIGNTYGKYLERDTATPLIRIGFPIFDRHHHHRSPIWGYQGGLNVLVKILDKIFDEIDNKTNILGKTDY	GTAGTCGGTTTTGCCAAGAATGTTGGTCTTGTTGTCGATCTCGTCGAAGATCTTGTCCAGGATCTTGACCAGCACATTCAGACCGCCCTGATAGCCCCATATGGGGGAGCGGTGATGGTGATGCCGGTCGAAAATCGGAAAGCCGATGCGGATCAGTGGCGTTGCGGTATCACGCTCCAGATACTTCCCATAGGTGTTGCCAATCAGAAAATCGACCGGCTCGGTGAAGAAGAGTTAAAGCCTGAGCCAAA	Bradyrhizobium diazoefficiens USDA 122
K157	NifK	GLSATDDFIVALSRISGKEIPEQLARERGRLVDAIADSSAHVHGKKFEIYGDPDLCYGLAAFLLKFGPVQIHVLPHNGNKG	AGGCTTATCAGCAACGGATGACTTTATCGTCGCGCTGTCACGCATCAGCGGCAAGGAGATTCCGGAGCAACTCGCGCGAGAACGTGGCCGCTTGGTGGATGCCATTGCCGACTCAAGCGCTCATGTTCATGGCAAAAAGTTCGAGATCTATGGCGATCCGGATCTTTGCTATGGATTGGCAGCGTTTCTGCTCAAATTCGGCCCAGTACAGATCCATGTGCTGCCCCACAATGGTAACAAAGGTGGGTAGG	Bradyrhizobium diazoefficiens NK6
K158	NifK	FWDGKAGTAPKLERKENDKINFIGGFDGYTVGNIREMKRIFELMGIEYTLLADNSDVFDTPTDGEFRMYDGGTTLEDAANAIH	CTTCTGGGACGGCAAGGCCGGTACCGCCCCGAAGCTCGAGCGCAAGGAGAATGACAAGATCAACTTCATCGGCGGCTTCGACGGCTACACCGTCGGCAACATCCGCGAGATGAAGCGCATCTTCGAGTTGATGGGGATCGAATACACCCTCCTCGCCGACAACAGCGACGTGTTCGACACCCCGACCGACGGCGAGTTCCGCATGTATGACGGCGGCACCACGCTGGAGGACGCCGCTAACGCGATCCATG	Bradyrhizobium sp. S23321
K159	NifK	LNVLVRILDKIFDEIDKNTNVPAKSDYSFDIIR	GCCTGAATGTCCTGGTGCGCATCCTGGACAAGATTTTTGACGAGATCGACAAGAACACCAACGTGCCGGCGAAGTCGGACTACAGCTTCGACATCATTCGATAGGGAGGGCTTTCCGGCGAGGCGGCTGCCGCCTCGAATCGGGGACACGGTTCACAACAAAACGACTGCGGCCTCCGCTCCGATCACGTCGGACCGGGGGGGTGAAGGAAGCTTCGAGGGATGCAGGGTTCGGGGGATTTCGGTTTCGTT	Bradyrhizobium oligotrophicum S58
K160	NifK	HMEEKHQIPWMEYNFFGQTKIAESLRKIADQFDDTIRANAEAVIAKYEGQMAAIIAKYRPRLEGRKVLLYMGGLRPRPVIGA	CCATATGGAGGAGAAACATCAGATCCCATGGATGGAATATAACTTCTTCGGCCAGACCAAAATCGCCGAATCGCTGCGCAAGATCGCCGATCAATTTGATGACACCATTCGCGCCAATGCGGAAGCGGTGATCGCCAAATATGAGGGGCAGATGGCGGCCATCATCGCCAAATATCGCCCGCGGCTGGAGGGGCGCAAAGTGCTGCTGTACATGGGGGGGCTGCGACCGCGCCCCGTCATCGGCGCCT	Klebsiella pneumoniae KP5-1
K163	NifK	LNAFIKTSKEKGSVPAEFDVPFAHTPAFVGSHVTGYDNALKGILEHFWDGKAGTAPKLERQPNEKVNFIGGFDWYTSGKNRQ	CCTCAACGCCTTCATCAAGACCTCGAAGGAGAAGGGCTCGGTCCCGGCGGAATTCGACGTCCCCTTCGCGCATACGCCCGCCTTCGTGGGCAGCCATGTCACCGGCTACGACAACGCGTTGAAGGGCATTCTCGAGCATTTCTGGGACGGCAAGGCCGGAACGGCGCCGAAGCTCGAGCGCCAGCCCAACGAGAAGGTCAATTTCATCGGCGGCTTTGACTGGTACACCTCCGGCAAGAACCGCCAGAGCA	Bradyrhizobium sp. ORS278
K164	NifK	HHHPRYPVWGYQGGMNVLVWILDKIFDEIDRNTNVPAKTDFSFDIIR	GAACGGCTTGCCAAAACGCCGACGGCGGACCTCGCCTTCGGTAGAGCCGCCCCACCGCCGCTCCCGATATCCGGGAAGGCGGCGAGGCAGTTGTCGCGATCACCCGCTCAGCGGATGATGTCGAAGCTGAAGTCCGTCTTCGCGGGAACGTTGGTGTTCCGGTCGATCTCGTCGAAGATCTTGTCGAGGATCCACACCAGCACGTTCATCCCACCCTGGTAGCCCCAGACCGGATAGCGGGGGTGGTGATG	Bradyrhizobium oligotrophicum S58
K165	NifK	LFTEPVDFLIGNTYGKYLERDTGTPLIRIGFPIFDRHHHHRYPVWGYQGGMNVLVWILDKIFDEIDRNTNVPAKTDFSFDII	CTGTTCACCGAGCCGGTCGATTTCCTGATCGGAAATACCTACGGCAAGTATCTGGAGCGTGATACCGGAACGCCGCTGATCCGGATCGGCTTCCCGATCTTCGATCGCCATCACCACCACCGCTATCCGGTCTGGGGCTACCAGGGTGGGATGAACGTGCTGGTGTGGATCCTCGACAAGATCTTCGACGAGATCGACCGGAACACCAACGTTCCCGCGAAGACGGACTTCAGCTTCGACATCATCCG	Bradyrhizobium sp. ORS278
K166	NifK	MRQNADHVLDHFELFRGPEYQQMLANKKKMFENPRDPAEVERIREWAKTPEYR	CGCGATATTCCGGGGTCTTGGCCCATTCGCGAATGCGCTCGACCTCGGCGGGGTCGCGGGGATTCTCGAACATCTTCTTCTTGTTCGCCAGCATCTGCTGGTATTCCGGGCCGCGGAACAGCTCGAAATGATCGAGCACATGGTCTGCATTCTGCCTCATCGTCGCACCTTTCAAAATGTGTGTGTCGCTCCTGGCTGCCGGCGTTTCCCTGCTCTGGCAGCGCCGGCTTTGAGCCGGGTACTCCGCCGG	Bradyrhizobium icense LMTR 13
K167	NifK	RERGRLVDAIADSSAHVHGKKFAIYGDPDLCYGLAAFLLELGAEPTHVLSTNGNKAWQEKMQALLASSPFGQGCQVYPGRDLW	CGCGAGAACGTGGCCGCTTGGTTGATGCCATTGCCGACTCAAGCGCTCATGTTCATGGCAAAAAGTTCGCGATCTATGGCGATCCGGATCTTTGCTATGGATTGGCTGCGTTTCTGCTCGAACTCGGCGCCGAGCCGACCCATGTGCTGTCCACCAATGGCAACAAAGCGTGGCAGGAGAAAATGCAGGCGCTGCTTGCAAGCTCGCCATTTGGACAGGGCTGCCAAGTCTATCCGGGGCGGGATCTCTGG	Bradyrhizobium diazoefficiens USDA 122
K168	NifK	VPAEFDVPFAHTPAFVGSHVTGYDNALKGIIEHFWDGKAGTAPKLERKPNEKINFIGGFDGYTVGNIREMKRIFELMGIE	CTCGATCCCCATCAGCTCGAAGATGCGCTTCATCTCGCGGATGTTGCCGACGGTGTAGCCGTCGAAACCGCCGATGAAGTTGATCTTTTCGTTCGGCTTGCGCTCGAGCTTCGGCGCCGTACCGGCCTTTCCGTCCCAGAAGTGCTCGATGATTCCCTTCAGCGCGTTGTCATAGCCGGTGACATGGCTGCCGACGAACGCGGGCGTGTGGGCGAAGGGAACGTCGAACTCGGCGGGAACCCAGGCCTGTT	Bradyrhizobium sp. S23321
K169	NifK	GCVAYYRSHLSRHFKEPSSCVSSSMTEDAAVFGGLNNMIDGLANTYNLYKPKMIAASTTCMA*VIGDNLNAFIKPPKSKGSVP	GGGCTGCGTCGCCTATTATCGCAGCCACCTGTCGCGGCACTTCAAAGAGCCGAGTTCCTGCGTCTCGTCGTCGATGACGGAAGATGCGGCCGTGTTCGGCGGCCTGAACAACATGATCGACGGGCTCGCCAACACCTATAACCTGTACAAGCCGAAGATGATCGCGGCATCCACCACCTGCATGGCGTAAGTCATCGGCGACAACCTCAATGCCTTCATCAAGCCTCCCAAGTCAAAGGGCTCGGTCCCC	Bradyrhizobium sp. S23321
K170	NifK	PLIRIGFPVFDRHHHHRYPVWGYQGGMNVLVKILDKIFDEIDKNTNVPAKTDYSFDIIR	CCTCTGATCCGTATCGGCTTCCCGGTGTTCGATCGCCACCATCACCATCGCTACCCGGTGTGGGGCTATCAGGGCGGCATGAACGTGCTCGTGAAGATTCTCGACAAGATCTTCGACGAGATCGACAAGAACACCAACGTGCCTGCCAAAACCGACTACAGCTTCGACATCATTCGCTGACGTCGCGGAGGTCTGCCGCTGCTCCATGAACGGGCAGCGGCGGACGACCAGTCTCGCCAGAGAGAACGAGA	Bradyrhizobium sp. S23321
K171	NifK	NKKTLFENPHDPADVERIREWAKTPEYREKNFAREALTVNPAKACQPLGAVFVAVGFEGTLPFVHGSQGCVAYYRSHLSRHFK	CCTTGAAATGGCGCGACAAATGGCTGCGGTAATAGGCGACGCAACCCTGCGAGCCGTGCACGAAAGGCAGCGTGCCCTCGAAGCCAACCGCCACGAACACGGCGCCCAAAGGCTGGCAGGCCTTGGCTGGATTGACGGTCAGGGCCTCGCGAGCAAAATTCTTTTCGCGATATTCGGGCGTCTTGGCCCATTCGCGGATGCGCTCGACATCCGCCGGGTCGTGCGGATTCTCGAACAGTGTCTTCTTGTT	Bradyrhizobium sp. S23321
K172	NifK	KTSKEKGSVPAEYDVPFAHTPAFVGSHVTGYDNAMKGILEHFWDGKAGTAPKLERVPNEKINFIGGFDGYTVGNLREIKRIFK	GTCTTGAAGATGCGCTTGATCTCCCGGAGGTTGCCGACGGTGTAGCCGTCGAAGCCGCCGATGAAGTTGATCTTCTCGTTAGGGACGCGCTCGAGCTTCGGCGCGGTGCCGGCCTTGCCGTCCCAGAAGTGCTCCAGGATGCCCTTCATCGCGTTGTCGTAGCCGGTGACGTGGCTGCCGACGAAGGCGGGGGTGTGGGCGAAGGGCACGTCGTACTCGGCCGGGACCGAGCCCTTTTCCTTCGACGTCTT	Bradyrhizobium sp. ORS278
K173	NifK	TEDAAVFGGLNNMIDGLANAYNMYKPKMIAVSTTCMAEVIGDDLNAFIKTSKEKGSVPAEYDVPFAHTPAFVGSHVTGYDNPM	ACCGAGGACGCAGCCGTGTTCGGAGGCCTCAACAACATGATCGATGGCCTCGCCAACGCCTACAACATGTACAAGCCGAAGATGATCGCGGTCTCGACCACCTGCATGGCGGAAGTCATCGGCGACGACCTCAACGCCTTCATCAAGACGTCGAAGGAAAAGGGCTCGGTCCCGGCCGAGTACGACGTGCCCTTCGCCCACACCCCCGCCTTCGTCGGCAGCCACGTCACCGGCTACGACAACCCGATGAA	Bradyrhizobium sp. ORS278
K174	NifK	LAAFLLELGAEPTHVLSTNGSKAWAEKMEGLFASSPFGKNCHAYAGKDLWHMRSLLFTEPVDFLIGNTYGKYLERDTGTPLIR	CTCGCGGCCTTCCTGCTCGAGCTCGGCGCCGAACCGACCCATGTCCTGTCGACTAACGGCAGCAAGGCCTGGGCCGAGAAGATGGAAGGGCTGTTCGCGAGCTCGCCGTTCGGCAAGAACTGCCACGCCTACGCGGGCAAGGATCTCTGGCACATGCGCTCGCTGCTGTTCACCGAGCCGGTCGATTTCCTGATCGGCAACACCTACGGCAAGTACCTCGAGCGCGATACCGGCACGCCGCTGATCCGCAT	Bradyrhizobium sp. S23321
K175	NifK	GPPLTRYAFPVFDRHHHHRYPVWGYQGGMNVLVKILDKIFDEIDRNTNVPAKTDYSFDIIR	GACTTGCATTGTGCCGCCGCCCCATTACAGGGCGGCGGCACGTCTCCGTGCAATCAGCGGATGATGTCGAAGCTATAGTCGGTCTTGGCCGGCACGTTGGTGTTCCTGTCGATTTCATCGAAGATCTTGTCGAGGATCTTCACCAGCACGTTCATGCCGCCCTGATAACCCCACACCGGATAGCGGTGGTGGTGATGGCGGTCGAATACCGGGAAGGCGTAGCGGGTCAGCGGGGGGCCGGGATGGGCCCG	Azorhizobium caulinodans ORS 571
K176	NifK	MTQNAEHVLDHFELFRGPEYQQMLANKKTLFENPHDPADVERIREWAKTPEYR	GAATAGCAGAGGCGACGTTCGGCTCTTCCCGATCCCGCGGGAAGAGCCGAAGGATAGGCGATCGAACACGACATCCAACGAAGGTGCCAACATGACACAGAATGCCGAACACGTGCTCGATCATTTCGAGCTGTTCCGTGGTCCCGAATACCAGCAGATGCTGGCGAACAAGAAGACACTGTTCGAGAATCCGCACGACCCGGCGGATGTCGAGCGAATCCGCGAATGGGCCAAGACGCCCGAATATCGCG	Bradyrhizobium sp. S23321
K177	NifK	ALLLHETDDILMGNTHGKYLERDTETPPIRLGLPIFDRHHHHRYPVWGFQGGMNVLVWILDKIFDEIDRNNNVPAKTDF	GAAGTCGGTCTTCGCGGGAACGTTGTTGTTCCGGTCGATCTCGTCGAAGATCTTGTCGAGGATCCACACCAGCACGTTCATCCCACCCTGGAAGCCCCAGACCGGATAGCGGTGATGGTGATGGCGATCAAAGATCGGTAAGCCGAGACGGATCGGCGGCGTTTCGGTGTCGCGCTCCAGATACTTGCCGTGGGTATTTCCCATCAGGATATCGTCTGTCTCGTGTAACAGTAGCGCTGGCCTCAGTCCGA	Bradyrhizobium oligotrophicum S58
K178	NifK	MTVRVTILKKYFEELNKHPTVPAKTDYSFDIIR	CTTGCTGGATCGTGGCCGACAGCGAACTCATTCGTCTCTCCTCACCAGGGACCGGCTCATTCCCGGCAACAAAACCTGCCTTCGGTAGACCCGTCCCGCCGCCCTTTCCCTTGTGAGGGAACGACGGCGGAACGGCATTCGCGCCAGCCTCAGCGGATGATGTCGAAGCTGTAGTCGGTCTTGGCGGGAACGGTGGGGTGTTTGTTGAGCTCTTCAAAATACTTTTTGAGGATCGTCACACGGACGGTCAT	Immundisolibacter cernigliae TR3.2
K179	NifK	PGKDLWHMRSLLFTEPVDFLIGNTYGKYLERDTGTPLIRIGFPIFDRHHHHRYPVWGYQGGMNVLVTILDKIFDEIDKNTNV	ATCCAGGCAAGGATCTCTGGCATATGCGCTCGCTTCTGTTCACCGAGCCGGTCGATTTCCTGATCGGGAACACCTACGGCAAGTATCTGGAGCGCGACACCGGCACGCCGCTGATCCGCATCGGCTTCCCGATCTTCGATCGTCATCACCATCACCGCTATCCGGTCTGGGGATATCAGGGCGGCATGAACGTCCTGGTGACGATCCTCGACAAGATCTTTGACGAGATCGACAAGAACACCAACGTTCC	Bradyrhizobium oligotrophicum S58
K180	NifK	SMADASAHIHGKKFAIYGDPDLCIGLAAFLLELGAEPTHVLATNGTKQWAEKVQAVFDSSPFGQNCHVYAGKDLWHMRSLLF	GTGAACAGCAGCGAGCGCATGTGCCAGAGATCCTTGCCGGCGTAGACGTGACAATTCTGGCCGAACGGCGAGCTGTCGAAAACGGCCTGGACTTTTTCTGCCCATTGCTTGGTACCGTTGGTTGCCAGCACATGCGTGGGCTCAGCGCCGAGTTCAAGCAAGAATGCCGCCAGACCGATGCACAGATCCGGATCTCCATAGATCGCGAATTTCTTGCCGTGGATATGCGCGCTGGCATCCGCCATGGAGT	Bradyrhizobium oligotrophicum S58
K181	NifK	LLFTEPVDFLIGNTYGKYLERDTGTPLIRIGFPIFDRHHKHRYPVWGYQGGLNVLVTILDKIFDEIDRNTKVPSKSDYSFDII	CTGCTGTTCACCGAGCCGGTCGACTTCCTGATCGGCAACACCTACGGCAAGTATCTGGAGCGCGACACCGGCACGCCACTGATCCGCATCGGCTTCCCGATCTTCGATCGCCACCACAAGCACCGCTATCCGGTGTGGGGCTATCAGGGCGGCCTCAACGTGCTGGTCACGATCCTGGACAAGATCTTCGACGAGATCGACCGCAACACCAAAGTGCCGTCCAAGTCGGACTACAGCTTCGACATCATACG	Bradyrhizobium sp. BTAi1
K182	NifK	QMLANKKALFENPHDPAEVERIREWAKTPEYREKNFAREALTVNPAKACQPLGAVFVAVGFEGTLPFVHGSQGCVAYYRSHLS	GCAGATGCTGGCCAACAAGAAAGCGCTGTTCGAGAATCCGCATGATCCCGCGGAAGTCGAACGCATCCGCGAATGGGCGAAGACGCCCGAATATCGCGAGAAGAATTTTGCCCGCGAAGCGCTGACCGTCAACCCCGCCAAGGCGTGCCAGCCATTGGGCGCGGTGTTCGTCGCGGTCGGCTTTGAGGGAACGCTACCCTTCGTGCATGGGTCGCAGGGCTGCGTCGCCTACTACCGCAGTCATTTGTCT	Bradyrhizobium sp. S23321
K183	NifK	IHISHGPVGCGQYSWAARRNYYIGTTGIDTFVTMQFTSDFQEKDIVFGGDKKLAKIIDEIQELFPLNHGITIQSECPIGLIGD	GATCCATATCAGCCACGGCCCGGTCGGCTGCGGCCAGTATTCCTGGGCCGCGCGGCGCAACTACTATATCGGCACGACGGGCATCGACACCTTCGTGACCATGCAGTTCACCTCCGACTTCCAGGAGAAGGACATCGTGTTCGGCGGCGACAAGAAGCTCGCCAAGATCATCGACGAAATCCAGGAGTTGTTCCCCCTCAACCACGGCATCACCATCCAGTCGGAATGCCCGATCGGCCTGATCGGCGACG	Bradyrhizobium sp. ztm3
K184	NifK	AKAKSKEYEGKTIVPVRCEGFRGVSQSLGHHIANDAVRDWIFDKISPEAKPKFESSPYDVAIIGDYNIGGDAWSSRILLEEMG	GGCCCATCTCCTCCAGCAGGATGCGGGAGGACCAGGCATCGCCGCCGATATTGTAGTCGCCGATGATCGCGACGTCGTAAGGCGAGGACTCGAATTTCGGCTTCGCCTCGGGGGAGATCTTGTCGAAGATCCAGTCGCGCACCGCGTCGTTGGCGATGTGGTGGCCGAGCGACTGCGAAACGCCGCGGAAGCCTTCGCACCGCACCGGGACGATGGTCTTGCCCTCATACTCCTTGGACTTCGCCTTCGC	Bradyrhizobium sp. ztm3
K185	NifK	FWDGKAGTAPKLERKPNETINFIGGFDGYTVGNLKEVKHIFEVMGIGYTILGDNSNVFDTPTDGEVRMYDGGTTLEEAANAIH	CTTCTGGGACGGCAAGGCCGGCACGGCGCCGAAGCTGGAGCGCAAGCCGAACGAAACCATCAACTTCATCGGCGGCTTCGACGGCTATACCGTCGGCAACCTGAAGGAGGTCAAGCACATCTTCGAGGTGATGGGGATCGGATACACGATCCTCGGCGACAACAGCAACGTGTTCGATACACCCACCGACGGCGAGGTCCGCATGTATGACGGCGGTACCACGCTGGAAGAGGCGGCCAATGCGATCCACG	Bradyrhizobium sp. ORS278
K186	NifK	GQEVVAFNHPVGVTGPDAFVMALSRITGKELPEQLALERGRLVDAIADSSAHIHGKKFAIYGDPD	GGTCGGCTCCGCACCGAGCTCGAGCAGAAAGGCTGCGAGACCCAGGCAGAGGTCCGGGTCGCCATAGATCGCGAACTTCTTGCCGTGGATGTGGGCGCTGGAGTCGGCGATGGCATCAACCAGGCGGCCGCGTTCGAGCGCGAGTTGCTCGGGAAGCTCCTTGCCGGTGATGCGCGACAGCGCCATCACGAAGGCATCCGGGCCGGTCACGCCAACCGGATGGTTGAACGCGACAACCTCCTGGCCGGGAT	Bradyrhizobium oligotrophicum S58
K187	NifK	HMRSLLFTEPVDFLIGNTYGKYLERDTGTPLIRIGFPIFDRHHHH	CGGTGGTGGTGATGGCGATCGAAGATCGGGAAGCCGATCCGGATCAGCGGCGTTCCGGTATCACGCTCCAGATACTTGCCATAGGTATTCCCGATCAGGAAATCGACCGGCTCGGTGAACAGCAGCGAGCGCATGTGC	Immundisolibacter cernigliae TR3.2
K188	NifK	HMRSLLFTEPVDFLIGNTYGKYLERDTGTPLIRIGFPIFDRHHHH	GCACATGCGCTCGCTGCTGTTCACCGAGCCGGTCGATTTCCTGATCGGGAATACCTATGGCAAGTATCTGGAGCGTGATACCGGAACGCCGCTGATCCGGATCGGCTTCCCGATCTTCGATCGCCATCACCACCACCG	Immundisolibacter cernigliae TR3.2
K189	NifK	LATNGNKHWAEKVQAVFDSSPFGANCHVYAGKDLWHMRSLLFTEPVDFLIGNTYGKYLERDTGTPLIRIGFPIFDRHHKHRY	GGATAACGGTGCTTGTGGTGCCGATCGAAGATCGGGAAGCCGATACGGATCAGGGGCGTGCCGGTATCGCGCTCCAGGTACTTGCCGTAGGTGTTGCCGATCAGGAAATCGACCGGCTCGGTGAACAGCAGCGATCGCATGTGCCAGAGATCCTTGCCGGCATACACATGGCAGTTCGCACCGAATGGCGAGCTATCGAACACCGCCTGAACCTTCTCGGCCCAGTGCTTGTTGCCGTTGGTGGCCAGCA	Bradyrhizobium oligotrophicum S58
K190	NifK	KFAIYGDPDLCLGLAAFLLELGAEPTHVLATNGNKHWAEKVQAVFDSSPFGANCHVYAGKDLLPMSSLLFTEPVGFLIGNPYG	AAGTTTGCGATCTACGGCGATCCGGACCTCTGCCTCGGTCTCGCAGCCTTCCTGCTCGAGCTCGGCGCCGAGCCGACCCATGTGCTGGCCACCAACGGCAACAAGCACTGGGCCGAGAAGGTTCAGGCGGTGTTCGATAGCTCGCCATTCGGTGCGAACTGCCATGTGTATGCCGGCAAGGATCTCCTGCCCATGAGCTCGCTGCTGTTCACCGAGCCGGTCGGTTTCCTGATCGGCAACCCCTACGGCAA	Bradyrhizobium oligotrophicum S58
K191	NifK	GKKFAIYGDPDLCLGLAAFLLELGAEPTHVLATNGNKHWAEKVQAVFDSSPFGKNCHVEPGKELWHIRSLLFNDTDEFLICN	ATGGCAAGAAGTTCGCAATCTACGGCGATCCGGATCTCTGCCTCGGCCTCGCCGCGTTCCTGCTGGAGCTGGGCGCCGAGCCGACCCACGTGCTCGCCACCAACGGCAACAAGCACTGGGCCGAGAAGGTGCAGGCGGTGTTCGACAGCTCGCCGTTCGGCAAGAACTGCCACGTGGAGCCCGGCAAGGAACTCTGGCACATTCGGTCGCTGCTCTTCAACGACACGGACGAGTTCCTGATCTGCAACAC	Bradyrhizobium oligotrophicum S58
K192	NifK	DHCYGLAAFLLQLGAEPTHVLATNGNKTWAEKMEALFASSPFGKNCHVYPGKDLWHMRSLLFTEPVDFLIGNTYGKYLERDTG	TGCCGGTGTCGCGCTCCAGGTACTTGCCGTAGGTGTTCCCGATCAGGAAGTCGACGGGCTCGGTAAACAGCAGCGAGCGCATGTGCCAGAGATCCTTGCCGGGATAGACATGGCAGTTCTTGCCGAACGGCGAGCTCGCGAACAGCGCTTCCATCTTCTCCGCCCAGGTCTTGTTGCCGTTGGTCGCCAGGACATGGGTGGGCTCGGCACCGAGCTGGAGCAGGAACGCCGCCAGGCCGTAGCAGTGGTC	Bradyrhizobium oligotrophicum S58
K193	NifK	TTLEDAANAIHADATISMQQYCTEKTLPFIGGHGQEVVAFNHPVGVSATDDLLMALSRITGKAIPKALEQERGRLVDAMADSS	CGCTGGAGTCCGCCATGGCATCCACCAGGCGGCCGCGCTCCTGCTCCAGGGCCTTCGGGATCGCCTTGCCGGTGATCCGTGACAACGCCATCAGGAGGTCGTCGGTGGCGCTGACGCCGACCGGATGGTTGAAGGCAACGACCTCCTGGCCGTGACCGCCGATGAAGGGCAACGTCTTCTCCGTGCAATATTGCTGCATGGAGATGGTTGCATCGGCATGGATCGCGTTCGCCGCGTCCTCCAGCGTGGTA	Bradyrhizobium sp. S23321
K194	NifK	TTLEDAANAIHADATISMQQYCTEKTLPFIGGHGQEVVAFNHPVGVSATDDLLMALSRITGKAIPKALEQERGRLVDAMADSS	CATCAAGACGTCGAAGGAGAAGGGCTCGGTCCCGGCCGAGTTCGACGTTCCCTTCGCCCACACGCCTGCCTTCGTCGGCAGCCACGTCACCGGCTATGACAACGCGCTGAAGGGCATCCTGGAGCACTTCTGGGACGGCAAGGCCGGCACCGCGCCGAAGCTCGAGCGCAAGCCGAACGGCAAGACCAACTTCATCGGCGGCTTCGACGGCCACACCGTCGGCAAGCTCCGCCGGATGGAGAGCCTCTTCG	Bradyrhizobium sp. S23321
K195	NifK	ATHGTKPWA*KVQAVFDSSRFGKNCHVEPGKDLWHMRSLLFTEPVDFLIGNTYGKYLERDTGTPLIRIGFPIFDRHHKHRY	GGATAACGATGCTTGTGGTGGCGATCGAAGATCGGGAAGCCGATGCGGATCAGCGGCGTGCCGGTGTCGCGCTCCAGATACTTGCCGTAGGTGTTGCCGATCAGGAAGTCGACCGGCTCGGTGAACAGCAGCGACCTCATGTGCCAGAGATCCTTGCCGGGCTCCACGTGACAGTTCTTGCCGAACCGCGAGCTGTCGAACACCGCCTGCACCTTCTAGGCCCAGGGCTTTGTGCCGTGTGTGGCGGGCA	Bradyrhizobium oligotrophicum S58
K196	NifK	TYGKYLERDTATPLIRIGFPIFDRHHHHRSPIWGYQGGLNVLVKILDKIFDEIDNKTHILGKTDYSFDIIR	CACCTATGGGAAGTATCTGGAGCGTGATACCGCAACGCCACTGATCCGCATCGGCTTTCCGATTTTCGACCGGCATCACCATCACCGCTCCCCCATATGGGGCTATCAGGGCGGTCTGAATGTGCTGGTCAAGATCCTGGACAAGATCTTCGACGAGATCGACAACAAGACCCACATTCTTGGCAAAACCGACTACAGCTTCGACATCATTCGTTGATGAGCAACTACACGTGCCATCGTCCAGGACTGGA	Bradyrhizobium diazoefficiens NK6
K197	NifK	MSQTIDKIHSCYPLFEQDEYQTLFQNKKTLEEAHDAQRVQEVFAWTTTAEYEALNFQ	CTGGAAGTTCAGCGCTTCATACTCGGCGGTGGTGGTCCAGGCAAAAACCTCCTGCACACGCTGCGCGTCGTGCGCCTCTTCAAGGGTCTTTTTATTCTGGAACAGGGTCTGGTATTCATCCTGTTCAAACAGCGGATAACAGCTGTGAATTTTATCGATCGTTTGGCTCATGGTGTTTTCCTCCCGCGCCACAAATCGGTGGACTGAAGGGACAGTGAAGGGTCAATCCCGACAACTTCAGCCAATGGGAG	Klebsiella variicola GJ3
K198	NifK	IHARATISMQQYCTEKTLPFIGGHGQEVVAFNHPIGVGATDELLMTLSRIAGKPIAKALEQERGRLLDAMADSSAHI	GGATATGCGCACTGGAATCCGCCATGGCGTCGAGCAGACGGCCGCGCTCCTGCTCAAGCGCCTTCGCGATCGGCTTGCCCGCGATGCGCGAGAGCGTCATCAGAAGCTCGTCGGTGGCGCCGACGCCGATCGGGTGGTTGAAGGCGACGACCTCCTGGCCGTGACCGCCGATGAAGGGCAGCGTCTTCTCCGTGCAATATTGCTGCATGGAGATGGTGGCCCTGGCATGGAT	Bradyrhizobium sp. S23321
K199	NifK	IHARATISMQQYCTEKTLPFIGGPGPGVCAFTPPLRVGAPDGLLMKVLRHPGQPTGEEVCQGGGRALGRPAGVWGHHPG	ATCCATGCCAGGGCCACCATCTCCATGCAGCAATATTGCACGGAGAAGACGCTGCCCTTCATCGGCGGTCCCGGCCCTGGGGTCTGCGCCTTCACCCCCCCCCTCCGCGTCGGGGCCCCCGACGGACTTCTGATGAAGGTCCTCCGCCACCCCGGGCAGCCCACCGGCGAGGAGGTTTGTCAGGGGGGGGGCCGCGCGCTCGGACGCCCGGCGGGTGTCTGGGGGCATCATCCAGGTCTCTCTTCACAAT	Bradyrhizobium sp. S23321
K202	NifK	KEIPEQLARERGRLVDAIADSSAHVHGKKFAIYGDPDLCYGLAAFLLELGAEPTHVLSTNGNKAWQEKMQALLASSPFGQGC	TGGCAGCCCTGTCCAAATGGCGAGCTTGCAAGCAGCGCCTGCATTTTCTCCTGCCACGCTTTGTTGCCATTGGTGGACAGCACATGGGTCGGTTCGGCGCCGAGTTCGAGCAGAAACGCAGCCAATCCATAGCAAAGATCCGGATCGCCATAGATCGCGAACTTTTTGCCATGAACATGAGCGCTTGAGTCGGCAATGGCATCAACCAAGCGGCCACGTTCTCGCGCGAGTTGCTCCGGAATCTCCTTGC	Bradyrhizobium diazoefficiens NK6
K203	NifK	DGTAGTAPKLERKPNGAINIIGGFDGSTGGNPREITRIL*FLGIPPRVLAGTSAVCATPTTVAFSVVDGGNNPKDGGNAIH	GGACGGCACGGCCGGAACAGCGCCGAAGCTGGAGCGCAAACCGAATGGAGCGATCAACATCATTGGCGGCTTTGATGGGTCTACCGGCGGGAACCCTCGCGAGATTACACGCATCTTGTAATTTTTGGGCATTCCGCCGCGCGTTCTCGCCGGTACATCTGCAGTGTGTGCAACTCCTACGACCGTCGCATTCTCGGTGGTTGACGGGGGGAACAATCCTAAGGATGGTGGGAACGCGATCCACTGCGCGG	Bradyrhizobium japonicum
K204	NifK	LMTLSRIAGKPIAKALEQERGRLLDAMADSSAHIHGKKFAIYGDPDLCYGLAAFLLELGAEPTHVLSTNGNKGWAEKMQQLF	TCTGATGACGCTCTCGCGCATCGCGGGCAAGCCGATCGCGAAGGCGCTCGAGCAGGAGCGCGGCCGCCTGCTCGACGCAATGGCGGATTCCAGTGCGCATATCCATGGCAAGAAGTTCGCGATCTATGGCGATCCCGACCTCTGCTATGGCCTGGCGGCCTTTCTGCTCGAACTCGGCGCCGAGCCGACCCATGTGCTGTCGACCAACGGCAACAAGGGTTGGGCTGAGAAGATGCAGCAGCTGTTCGATA	Bradyrhizobium sp. S23321
K205	NifK	RYPVWGYQGGMNVLVRILDKIFDEIDKNTNVPAKTDYSFDIIR	CCGCTATCCAGTGTGGGGATATCAGGGCGGCATGAACGTGCTGGTGCGGATCCTCGACAAGATCTTCGACGAGATCGACAAGAACACCAACGTTCCGGCGAAGACCGATTACAGCTTCGACATCATTCGCTGAGCCGGCATTGAAGACCTTCCGGCCGCCGCCCGCCACTGTGCGGAGCGACGGCCGGGGGGACCAAGACCAAGACAGATTTACGTTCCTCATGCCTGTGCCCGTTCCGTAGGAGAGACGA	Bradyrhizobium sp. S23321
K206	NifK	GTPMIRFEFPWLHRTHHHRCPVWGYQAGMNVLGKIHDKIFNEIYKNTTAPAKTDYSFDIIR	GGCTAGACTGGTCGTCCGCCGCTGCCCGTTCATGGAGCAGCGGCAGACCTCCGCGACGTCAGCGGATGATGTCGAAGCTGTAGTCGGTTTTGGCAGGCGCGGTGGTGTTCTTGTAGATCTCGTTGAAGATCTTGTCGTGAATCTTCCCGAGCACATTCATGCCGGCCTGATAGCCCCACACCGGGCATCGATGGTGGTGGGTGCGATGCAACCACGGGAACTCGAAACGGATCATAGGGGTGCCGGCGGC	Bradyrhizobium sp. S23321
K207	NifK	GKNCHAYAGKDLWHMRSLLFTEPVDFLIGNTYGKYLERDTGTPLIRIGFPVFDRHHHHRYPVWGYQGGMNVLVKILDKIFDEI	GGCAAGAACTGCCACGCCTATGCCGGCAAGGATCTCTGGCACATGCGCTCGCTGCTGTTCACCGAGCCGGTCGATTTCCTGATCGGCAATACCTACGGCAAGTACCTGGAGCGCGACACCGGCACGCCGCTGATCCGCATCGGCTTCCCGGTGTTCGACCGCCACCATCACCATCGCTATCCGGTGTGGGGCTATCAGGGCGGCATGAACGTGCTGGTGAAGATTCTCGACAAGATCTTCGACGAGATCGA	Bradyrhizobium sp. S23321
K301	NifK	PLVRLTFPIFDRHHHHRFPLMGYQGGLRLLTVILDKIFDELDQETMWEGVSYDLTR	CCATTAGTTCGGCTTACGTTTCCGATTTTCGACCGCCATCATCATCATCGCTTTCCTCTGATGGGCTACCAAGGTGGATTGCGTCTTCTGACCGTCATTCTCGACAAGATTTTCGACGAGCTTGATCAGGAGACCATGTGGGAAGGCGTTTCGTACGACCTCACGCGCTAAATGCTTGGCCGGGTGTCGACCGGCCATTCGTCCCTGGATTGGAAGGTCCCGAGATGTCATCGATCGAGACACAAATGCGA	Rhizobium leguminosarum bv. trifolii WSM1325
K303	NifK	DDPRIQALQQQVEYKMEIVANADLWEMEKHIPDGELELDLILGHSKGRFTAIDNQIPMVRVGFPTYDRAGHYRHPVVGYAGAI	AGATAGCACCAGCGTAACCCACCACCGGATGGCGATAGTGCCCGGCGCGGTCGTAGGTGGGAAAGCCCACGCGCACCATCGGGATCTGGTTATCAATGGCGGTAAAACGCCCTTTCGAGTGACCGAGAATCAGATCCAGCTCCAGCTCACCATCCGGAATGTGTTTTTCCATCTCCCACAGGTCGGCGTTGGCAACAATCTCCATCTTGTACTCCACCTGTTGCTGCAACGCCTGAATGCGCGGGTCATCG	Kosakonia oryzae Ola 51
K304	NifK	IYGDPDLIISITSFLLEMGAEPVHILCNNGDEAFKKEMEAILAASPFGKEAKVWIQKDLWHFRSLLFTEPVDFFVGNSYGKYL	ATCTACGGCGATCCCGACTTGATCATCTCCATCACCAGCTTCTTGTTAGAAATGGGTGCTGAACCAGTACACATCCTCTGCAACAATGGCGATGAAGCTTTCAAGAAAGAAATGGAAGCTATCCTCGCTGCTAGCCCCTTCGGTAAAGAAGCTAAAGTCTGGATTCAAAAAGACTTATGGCACTTCCGCAGCTTGTTGTTCACAGAACCCGTAGACTTCTTCGTTGGTAACTCCTACGGTAAGTACCTGTG	Nostoc sp. NIES-2111
K305	NifK	VPAEFDVPFAHTPAFVGSHVTGYDNALKGILEHFWDGKAGTAPKLERQPNEKVNFIGGFDGYTVGNTREIKRILDIMGIEHTI	GAATGGTGTGCTCGATCCCCATGATATCGAGGATTCGCTTGATCTCGCGGGTATTGCCGACGGTGTAACCGTCGAAGCCGCCGATGAAATTGACCTTCTCGTTGGGCTGGCGCTCGAGCTTCGGCGCCGTTCCGGCCTTGCCGTCCCAGAAATGCTCGAGAATGCCCTTCAACGCGTTGTCGTAGCCGGTGACATGGCTGCCCACGAAGGCGGGCGTATGCGCGAAGGGGACGTCGAATTCCGCCGGGAC	Rhodopseudomonas palustris BisB18
K306	NifK	MLNSTPAGSQPREALRIHPAKTCQPIGAMYASLGIHGCMPHSHG	AGCCGTGGCTGTGGGGCATGCAGCCGTGAATGCCTAGCGAGGCATACATGGCGCCGATGGGCTGGCAGGTCTTCGCGGGATGGATGCGAAGCGCCTCGCGCGGCTGACTTCCTGCGGGTGTGGAGTTCAACATGGTTTTTGGGGATTGATTATTGGGTATTGGGGATTGGTTACTTTTTCGTCGAAACCGTTGAGTGCCTCTAAATTCCCGACTGTCAGCTTTCCACTGCTTACGAGCCTCATTCCTCCGT	Pseudodesulfovibrio indicus J2
K307	NifK	PVDLLIGNTYGKYIARAEDVPFVRLGFPVLDRAGHRIAPTVGYRGAMRLIEKITDALLDHKDRTCAEENFELVQ	TCGGTGATCTGGTAGGCCATGGTTATTGGACGAGTTCGAAGTTTTCCTCGGCGCAGGTGCGATCCTTGTGATCGAGCAGCGCGTCGGTAATTTTTTCGATGAGACGCATGGCGCCGCGGTAGCCCACGGTCGGCGCGATCCGGTGGCCGGCACGGTCGAGCACGGGGAAGCCGAGGCGCACGAACGGGACGTCCTCGGCGCGGGCGATGTATTTGCCGTAGGTGTTGCCGATGAGCAGATCGACGGGCTCG	Chlorobaculum limnaeum DSM 1677
K308	NifK	KHAYVITGSHWNHFERKVKEILAEQAPNAFVKQQCDLFELHQLMKNEPVDLLIGNTYGKYIARAEDVPFVRLGFPVLDRAGHR	ATCCGGTGGCCGGCACGGTCGAGCACGGGGAAGCCGAGGCGCACGAACGGGACGTCCTCGGCGCGGGCGATGTATTTGCCGTAGGTGTTGCCGATGAGCAGATCGACGGGCTCGTTCTTCATGAGCTGGTGAAGCTCGAAGAGATCGCACTGTTGCTTCACGAAGGCGTTCGGCGCCTGCTCGGCGAGGATTTCCTTCACCTTGCGCTCGAAGTGATTCCAGTGGGAGCCGGTGATCACGTAGGCGTGCTT	Chlorobaculum parvum NCIB 8327
K309	NifK	PTVILCHNANKRWQKAMKKMLEASPYGRDSEVFINCDLWHFRFLMFTRQPDFFIGNSYAKFIPRDTLATGAQFEMPLIRLGSP	GCCGACGGTCATCCTGTGTCATAACGCCAACAAACGCTGGCAGAAAGCCATGAAGAAAATGCTGGAGGCATCGCCTTATGGCAGGGACAGCGAAGTCTTTATCAACTGTGATTTGTGGCATTTCCGTTTCCTGATGTTTACCCGCCAGCCGGACTTTTTTATCGGGAACTCCTATGCCAAATTCATCCCGCGCGACACCCTCGCCACAGGCGCGCAATTCGAGATGCCCCTGATTCGCCTCGGATCTCCC	Rahnella aquatilis CIP 78.65
K310	NifK	MKPAYVITGSHGNHFERKVKEILAEQAPNAFVKQQCDLFELHQLMKNEPVDLLIGNTYGKYIARAEDVPFVRLGFPVLDR	ACATGAAGCCCGCCTACGTGATCACCGGCTCCCACGGGAATCACTTCGAGCGCAAGGTGAAGGAAATCCTCGCCGAGCAGGCGCCGAACGCCTTCGTGAAGCAACAGTGCGATCTCTTCGAGCTTCACCAGCTCATGAAGAACGAGCCCGTCGATCTGCTCATCGGCAACACCTACGGCAAATACATCGCCCGCGCCGAGGACGTCCCGTTCGTGCGCCTCGGCTTCCCCGTGCTCGACCGTGCCGGCCA	Chlorobaculum parvum NCIB 8327
K311	NifK	VGSVLFSVFFAHPPHSLRGSEVCVVYPPTLYHRHFKEPVACVSDSMTEDAAVFGGNNNMNTGLQNASTLYQPEIIAVSTTCMA	CTGCCATACAGGTGGTGGACACCGCGATGATCTCCGGCTGGTACAGGGTGCTGGCATTTTGCAGCCCGGTATTCATGTTGTTATTGCCGCCAAACACCGCCGCATCCTCGGTCATCGAGTCCGAGACACAGGCCACCGGCTCCTTGAAATGGCGGTGATATAATGTGGGGGGATACACCACACACACCTCCGAGCCGCGGAGAGAGTGTGGGGGATGTGCGAAAAACACCGAGAACAGCACAGACCCCAC	Pantoea sp. At-9b
K312	NifK	AKIWAGKDLWHMRSLMLTEPVDMLIGNSYGKYLERDTGTPLLRLTFPIFDRHHHHRFPLWGYQGGLRVLTAILDKVFDTLD	GCCAAGATCTGGGCCGGCAAGGACCTCTGGCACATGCGCTCGCTGATGCTGACCGAGCCGGTGGACATGCTGATCGGCAATTCCTACGGCAAATATCTGGAGCGCGACACCGGAACGCCACTGCTGCGCTTGACCTTCCCGATCTTCGACCGTCATCATCATCACCGCTTCCCGCTCTGGGGCTATCAGGGCGGTCTGCGGGTGCTGACGGCGATCCTCGACAAGGTGTTCGACACCCTCGACGCGGAGA	Hartmannibacter diazotrophicus E19T
K313	NifK	GQEVVSFNHPIGVTATDEFIMALSRISGKEIPEELARERGRLVDAMADSSAHIHGKKFAIYGDPDLCIGLAAFLLELGAEPTH	TGGCCAGGAAGTGGTGTCGTTCAATCACCCGATCGGGGTGACGGCGACGGACGAATTCATCATGGCGCTGTCGCGGATTTCCGGCAAGGAGATTCCGGAGGAGCTGGCGCGCGAACGCGGACGCCTGGTCGACGCCATGGCGGATTCAAGCGCGCATATCCACGGCAAGAAATTCGCGATCTATGGAGATCCGGATCTGTGCATCGGTCTGGCGGCATTCTTGCTTGAACTCGGCGCTGAGCCCACGCATG	Bradyrhizobium icense LMTR 13
K314	NifK	MLDSTPAEIQPREALRINPAKTCQPIGAMYASLGIHGCMPHSHGSQGCCAYHRSHLTRHFKEPVVATPSPFTEGADVFGG	CCCAAAAACCATGTTGGACTCCACACCCGCAGAAATTCAGCCTCGCGAGGCGCTTCGCATCAATCCCGCGAAGACCTGCCAGCCCATCGGCGCCATGTATGCCTCGCTCGGCATTCACGGCTGCATGCCCCACAGCCACGGCTCGCAAGGGTGCTGCGCCTACCACCGCAGCCACCTCACGAGGCATTTCAAGGAGCCCGTCGTCGCCACGCCTAGTCCGTTCACCGAGGGGGCGGACGTCTTCGGCGGC	Pseudodesulfovibrio indicus J2
K315	NifK	DHVIAMAQMLVELDMKPAYVITGSHGNHFERKVKEILAEQAPNAFVKQQCDLFELHQLMKNEPVDLLIGNTYGKYIARAED	ATCCCGACCACGTCATCGCGATGGCGCAGATGCTCGTCGAGCTCGACATGAAGCCCGCCTACGTGATCACCGGCTCCCACGGGAATCACTTCGAGCGCAAGGTGAAGGAAATCCTCGCCGAGCAGGCGCCGAACGCCTTCGTGAAGCAACAGTGCGATCTCTTCGAGCTTCACCAGCTCATGAAGAACGAGCCCGTCGATCTGCTCATCGGCAACACCTACGGCAAATACATCGCCCGCGCCGAGGACGT	Chlorobaculum limnaeum DSM 1677
K316	NifK	ELDMKPAYVITGSHGNHFERKVKEILAEQAPNAFVKQQCDLFELHQLMKNEPVDLLIGNTYGKYIARAEDVPFVRLGFPVLD	GTCGAGCACGGGGAAGCCGAGGCGCACGAACGGGACGTCCTCGGCGCGGGCGATGTATTTGCCGTAGGTGTTGCCGATGAGCAGATCGACGGGCTCGTTCTTCATGAGCTGGTGAAGCTCGAAGAGATCGCACTGTTGCTTCACGAAGGCGTTCGGCGCCTGCTCGGCGAGGATTTCCTTCACCTTGCGCTCGAAGTGATTCCCGTGGGAGCCGGTGATCACGTAGGCGGGCTTCATGTCGAGCTCGCCGA	Chlorobaculum parvum NCIB 8327

## Sheet: Data Set 2
Data Set 2. Assignment of NifHDK peptides by proteome analysis
Sorghum sample, nitrogenase subunit	Amino acid sequence of peptide detected by proteome analysis	Number of peptide	Assigned database ID
KM1-rep1, NifH	DNIVQSAELR	2	H109
KM1-rep1, NifH	IHKNK	1	H113
KM1-rep1, NifH	MMAMSAANNISKGILKYANSGGVR	1	H124
KM1-rep1, NifH	GGIGKST	1	multi assigned
KM1-rep1, NifH	AQEIYIVMSGEMMAMYAANNISKGILKYAN	1	multi assigned
KM1-rep1, NifH	LGGLNCNIR	1	H147
KM1-rep1, NifH	LGGLNCNSR	1	H147
KM1-rep1, NifH	LGGMVGK	2	H155
KM1-rep1, NifH	LGGMVGKER	1	H155
KM1-rep1, NifH	IYIVMTGEMMAMPAANNISK	1	H172
KM1-rep1, NifH	IYIVMTGEMMAMQAANNISKGILKYANSGGVR	1	H172
KM1-rep1, NifH	MAANTLSK	1	H178
KM1-rep1, NifH	MYAANTLSKGILK	1	H178
KM1-rep1, NifH	ENKAQEIYIVMSGDMMAMYAANNISKGILK	1	H193
KM1-rep1, NifH	LGGLICN	1	multi assigned
KM1-rep1, NifH	IAKGIFK	1	H133
KM1-rep1, NifH	LILNAK	1	H165
KM1-rep1, NifD	NDAYQR	1	D214
KM1-rep1, NifD	IADSLR	2	D247
KM1-rep1, NifD	KRSMNNHTR	1	D334
KM1-rep1, NifD	LNVRHRDR	1	D334
KM1-rep1, NifD	LSDRVEEVIAQEMAALRPIK	1	D319
KM1-rep1, NifD	QMHSSD	1	D170
KM1-rep1, NifD	LNVLHCY	1	multi assigned
KM1-rep1, NifD	HVIGAYE	1	multi assigned
KM1-rep1, NifD	IEEVLAAYPDKTK	1	D173
KM1-rep1, NifK	MYDGGTTLK	1	K134
KM1-rep1, NifK	MIAASTTCMAGVIGDNLNAFIKPPK	1	K169
KM1-rep1, NifK	DLLPMSSLLFTEPVGFLIGNPYG	1	K190
KM1-rep1, NifK	LVDAMADSS	1	multi assigned
KM1-rep1, NifK	ATHGTKPWAPKVQAVFDSSRFGK	1	K195
KM1-rep1, NifK	DLWHMRSLMLTEPVDMLIGNSYGKYLER	1	K312
KM1-rep1, NifK	GRLVDMMLDSHTWLHGKK	1	K137
KM1-rep1, NifK	LEGRK	1	K160
KM1-rep1, NifK	MSQTIDKIHSCYPLFEQDEYQTLFQNK	1	K197
KM1-rep2, NifH	AQEIYIVMSGEMMAMFAANNISKGILKYAN	1	H101
KM1-rep2, NifH	GGIGKST	1	multi assigned
KM1-rep2, NifH	IYIVMTGEMMAMCAANNISK	1	H172
KM1-rep2, NifH	MDAANTLSK	1	H178
KM1-rep2, NifH	MNAANTLSKGILK	1	H178
KM1-rep2, NifH	LGGLICN	1	multi assigned
KM1-rep2, NifD	VKSKEYEGK	2	D135
KM1-rep2, NifD	HLNVHENGKSDCGVK	1	D190
KM1-rep2, NifD	MAKAPWKQAPKPLLQAAE	1	D201
KM1-rep2, NifD	IQANAEK	1	D132
KM1-rep2, NifD	QMHSED	1	D170
KM1-rep2, NifD	IEEVLAAYPDKTK	1	D173
KM1-rep2, NifK	GGVAYYR	1	K141
KM1-rep2, NifK	TARVR	1	K154
KM1-rep2, NifK	VGAPDGLLMKVLR	1	K199
KM1-rep2, NifK	AGHYR	1	multi assigned
KM1-rep2, NifK	HFKEPVVATPSPFTEGADVFGG	1	K314
KM1-rep3, NifH	LMLHSK	1	H149
KM1-rep3, NifH	ELELADALAK	1	H108
KM1-rep3, NifH	DNIVQSAELR	2	H109
KM1-rep3, NifH	LILHAK	1	multi assigned
KM1-rep3, NifH	AQDTILSLAAAAGSVEDLEIEEVMKVGYQNI	1	H131
KM1-rep3, NifH	GGIGKST	2	H140
KM1-rep3, NifH	LGGMVGK	1	H155
KM1-rep3, NifH	IYIVMTGEMMAMGAANNISK	1	H172
KM1-rep3, NifH	IYIVMTGEMMAMHAANNISK	1	H172
KM1-rep3, NifH	MVAANTLSKGILKYANSGGVR	1	H178
KM1-rep3, NifH	EGKAQEIYIVTSGEMMAMYAANNIARGILK	1	H173
KM1-rep3, NifH	RMTVNEYAPDSNQSNEYR	1	H198
KM1-rep3, NifD	SNLKSIP	1	multi assigned
KM1-rep3, NifD	VKSKEYEGK	1	D135
KM1-rep3, NifD	DSWVK	1	D158
KM1-rep3, NifD	LKEGAERGIAK	1	D199
KM1-rep3, NifD	EKYGFQKMGVPFR	1	D214
KM1-rep3, NifD	RNYYIGTTGIDTFVTMQFTADFQEK	1	D228
KM1-rep3, NifD	IGAYEDLGMDVIGTGYEFGHNDDYQR	1	D246
KM1-rep3, NifD	DGNCDK	1	D318
KM1-rep3, NifD	SNIKSVPGVMTIRGCAYAGSK	1	D146
KM1-rep3, NifD	IEEVLAAYPDKTK	1	D173
KM1-rep3, NifK	DPAEVERVR	1	K120
KM1-rep3, NifK	GGVAYYR	1	K141
KM1-rep3, NifK	KENDKINFIGGFDGYTVGNIR	1	K158
KM1-rep3, NifK	AKAKSK	1	K184
KM1-rep3, NifK	NTTAPAK	1	K206
KM1-rep3, NifK	IWAGKDLWHMRSLMLTEPVDMLIGNSYGK	1	K312
KM1-rep3, NifK	FLLELGCEPTVILSHNANK	1	K137
KM2-rep1, NifH	LMLHSK	1	H149
KM2-rep1, NifH	IHNNK	1	H112
KM2-rep1, NifH	ILSVGCDPK	1	H119
KM2-rep1, NifH	IGGCDPKAASTR	1	H135
KM2-rep1, NifH	GVIMSFNLL	1	H145
KM2-rep1, NifH	GIIPTPITMDALEDMLMEHGIMKAVDESVVGK	1	H148
KM2-rep1, NifH	IYIVMTGEMMAMCAANNISK	1	H172
KM2-rep1, NifH	KTVTEFDPEANQAQEYRELGR	1	H106
KM2-rep1, NifD	NDAYQR	1	D214
KM2-rep1, NifD	RIAGYFDDK	1	D247
KM2-rep1, NifD	NPQLR	1	D327
KM2-rep1, NifK	FEFPWLHRTHHHRCPVWGYQAGMNVLGK	1	K206
KM2-rep2, NifH	TAAELAAMSA	1	H103
KM2-rep2, NifH	DNIVQSAELR	1	H109
KM2-rep2, NifH	LADAMAK	1	H109
KM2-rep2, NifH	IHKNK	1	H113
KM2-rep2, NifH	AVDESVVGKT	1	H127
KM2-rep2, NifH	AQEIYIVMSGEMMAMYAANNISTGILKYA	1	H144
KM2-rep2, NifH	IYIVMTGEMMAMMAANNISKGILK	2	H172
KM2-rep2, NifH	IYIVMTGEMMAMTAANNISK	1	H172
KM2-rep2, NifH	MNAANTLSKGILK	1	H178
KM2-rep2, NifH	DNIVQK	5	H106
KM2-rep2, NifH	LILNAK	1	H165
KM2-rep2, NifD	SDCGVKSNLKSIPGVMTIR	1	multi assigned
KM2-rep2, NifD	VKYNM	1	D124
KM2-rep2, NifD	DDIEAVSKVK	1	multi assigned
KM2-rep2, NifD	VIAKYQPLMDAVIAKCRPR	1	D153
KM2-rep2, NifD	DMDMPVNTPIWK	1	D155
KM2-rep2, NifD	NDAYQR	1	D214
KM2-rep2, NifD	IADSLRR	1	D247
KM2-rep2, NifD	IAGYFDDK	1	D247
KM2-rep2, NifD	LNCLYC	1	D301
KM2-rep2, NifD	GRSMNNHTR	1	D334
KM2-rep2, NifD	LNVRHRER	1	D334
KM2-rep2, NifD	LNVRHRGR	1	D334
KM2-rep2, NifD	GLNPLGLSTAR	1	D317
KM2-rep2, NifD	GLNPLGLSVAR	1	D317
KM2-rep2, NifD	KCGIHVTATLSGDVSYDQVK	1	D324
KM2-rep2, NifD	IEEVLAAYPDKTK	1	D173
KM2-rep2, NifK	GRLVDAIADSSAHVHGK	1	K109
KM2-rep2, NifK	GGVAYYR	3	K141
KM2-rep2, NifK	LNVLVR	1	K159
KM2-rep2, NifK	NNNVPAK	1	K177
KM2-rep2, NifK	NTKVPSK	1	K181
KM2-rep2, NifK	LATNGNK	1	K189
KM2-rep2, NifK	VLAGTSAVCATPTTVAFSVVDGGNNPKDGGNAIH	1	K203
KM2-rep2, NifK	ILDKIFDEI	1	multi assigned
KM2-rep2, NifK	IAPTVGYR	1	K307
KM2-rep2, NifK	LEGRK	1	K160
KM2-rep3, NifH	DIRMEHGIKTA	4	H113
KM2-rep3, NifH	LGGLNCNAR	1	H147
KM2-rep3, NifH	MYAANTLSKGILK	1	H178
KM2-rep3, NifH	DNIVQK	9	H106
KM2-rep3, NifD	AAKRR	1	D124
KM2-rep3, NifD	VKYFM	1	D124
KM2-rep3, NifD	GITVQSECPIGLIGDDIR	1	D216
KM2-rep3, NifD	VLHCYRSMNYISR	1	multi assigned
KM2-rep3, NifD	GSGHSSWAAR	1	D237
KM2-rep3, NifD	LNVLHCYRSMNYIS	1	D243
KM2-rep3, NifD	DMDMAINSPIWKKAK	1	D326
KM2-rep3, NifD	SLRKIAHYFESK	1	D330
KM2-rep3, NifD	DGTLIY	1	multi assigned
KM2-rep3, NifD	HVIGAYE	1	multi assigned
KM2-rep3, NifD	ILLEEMGLRVIAQW	1	multi assigned
KM2-rep3, NifD	IEEVLAAYPDKTK	1	D173
KM2-rep3, NifK	NCHVYPGKDLWHMR	1	multi assigned
KM2-rep3, NifK	KKMFQNPR	1	K119
KM2-rep3, NifK	LLDAMADSRAHIHGKK	1	K123
KM2-rep3, NifK	NGNKGWAEK	1	K131
KM2-rep3, NifK	GGVAYYR	2	K141
KM2-rep3, NifK	LNVLVR	4	K159
KM2-rep3, NifK	LGLPIFDR	2	K177
KM2-rep3, NifK	NNNVPAK	1	K177
KM2-rep3, NifK	NNNVPAKTDF	1	K177
KM2-rep3, NifK	ILLEEMG	1	multi assigned
KM2-rep3, NifK	LATNGNK	2	multi assigned
KM2-rep3, NifK	LGFPVLDR	1	K308
KM2-rep3, NifK	SLMLTEPVDMLIGNSYGK	1	K312
KM2-rep3, NifK	SLMLTEPVDMLIGNSYGKYLER	1	K312
KM2-rep3, NifK	LEGRK	3	K160
KM2-rep3, NifK	MMEQMEVPCSLLSDPSEVLDT	1	K103
KM2-rep3, NifK	MYDGGTTLEEAAAAINAK	1	K150
KM2-rep3, NifK	GILSNLTEGK	1	K130
